# Supplementary material for: Functional understanding of secondary cell wall cellulose synthases in Populus trichocarpa via the Cas9/gRNA‐induced gene knockouts
Source: PubMed Central journal article supplement (PMC8362133; doi:10.1111/nph.17338), 2021-06-10
Supplement: NPH-231-1478-s001.pdf [file NPH-231-1478-s001.pdf]

## ***New Phytologist* Supporting Information**

### **Functional understanding of secondary cell wall cellulose synthases in *Populus trichocarpa* via the Cas9/gRNA-induced gene knockouts**

Wenjing Xu, Hao Cheng, Siran Zhu, Jiyao Cheng, Huanhuan Ji, Baocai Zhang, Shenquan Cao, Chong Wang, Guimin Tong, Cheng Zhen, Liqiang Mu, Yihua Zhou, Yuxiang Cheng

Article acceptance date: 02 March 2021

#### **Supplemental Figures**

**Fig. S1** Cas9/gRNA system and stepwise protocol in Nisqually-1.

**Fig. S2** Cas9/gRNA-induced mutations in *PtrCHL11* gene and *PtrCHL11/2* family genes of *Populus trichocarpa*.

**Fig. S3** Cas9/gRNA-induced mutations in *PtrCesA7A*, *PtrCesA7B*, *PtrCesA8A*, and *PtrCesA8B* genes of *Populus trichocarpa*.

**Fig. S4** Production of anti-PtrCesA4, -7A/B, and -8A/B polyclonal antibodies in rabbits.

**Fig. S5** Transcriptional levels of five SCW *PtrCesA* genes in *ptrcesa* mutants using RT-PCR analysis.

**Fig. S6** Characterization of the *ptrcesa4*, *7a/b*, *8a/b*, *7a*, *7b*, *8a*, and *8b* mutants.

**Fig. S7** Observation of stem internodes, mature leaves, and roots of 3-month-old *ptrcesa4*, *7a/b*, and *8a/b* mutants.

**Fig. S8** Anatomic analysis of different stem internodes from WT, *ptrcesa4*, *7a/b*, and *8a/b* mutants.

**Fig. S9** Anatomic analysis of different stem internodes from WT, *ptrcesa7a*, *7b*, *8a*, and *8b* mutants.

**Fig. S10** Observation of pith parenchyma in WT, *ptrcesa4*, *7a/b*, and *8a/b* mutants.

**Fig. S11** Wall thickness of xylem and phloem fibres in the basal stems of 6-month-old WT and *ptrcesa* mutants.

**Fig. S12** Microscopic analysis of the disaggregated xylem fibres and vessels in WT, *ptrcesa4*, *7a/b*, and *8a/b* mutants.

**Fig. S13** Induction of tension wood (TW) in WT and *ptrcesa* mutants under gravi-stimulation.

**Fig. S14** Immunolocalization of crystalline cellulose in tension and opposite wood (TW, OW) sides in WT, *ptrcesa4*, *7ab*, and *8ab* mutants.

**Fig. S15** Immunolocalization of the xylan in tension and opposite wood (TW, OW) sides in WT, *ptrcesa4*, *7ab*, and *8ab* mutants.

**Fig. S16** Immunolocalization of  $\beta$ -(1 $\rightarrow$ 4)-galactan in tension and opposite wood (TW, OW) sides in WT, *ptrcesa4*, *7ab*, and *8ab* mutants.

**Fig. S17** Immunolocalization of the mannan in tension and opposite wood (TW, OW) sides in WT, *ptrcesa4*, *7ab*, and *8ab* mutants.

**Fig. S18** Immunolocalization of crystalline cellulose in phloem fibres of WT, *ptrcesa4*, *7ab*, and *8ab* mutants.

**Fig. S19** Immunolocalization of  $\beta$ -(1 $\rightarrow$ 4)-galactan in phloem fibres of WT, *ptrcesa4*, *7ab* and *8ab* mutants.

**Fig. S20** Immunolocalization of the mannan in phloem fibres of WT, *ptrcesa4*, *7ab*, and *8ab* mutants.

**Fig. S21** Immunolocalization of the xylan in phloem fibres of WT, *ptrcesa4*, *7ab*, and *8ab* mutants.

**Fig. S22** Lignin phloroglucinol staining in WT, *ptrcesa4*, *7ab* and *8ab* mutants.

**Fig. S23** Crystalline cellulose and lignin content in woods of WT, *ptrcesa7a*, *7b*, *8a*, and *8b* mutants.

## Supplemental methods

**Methods S1** Analysis of putative Cas9/gRNA off-target sites.

**Methods S2** RNA extraction and RT-PCR analysis.

**Methods S3** Scanning electron microscopy (SEM) of leaf epidermal cells.

**Methods S4** Wood fibre and vessel cell length analysis.

## Supplemental tables

**Table S1.** Primers used in this study.

**Table S2.** The Cas9/gRNA-targeted mutations in single *PtrCHL11* gene of *Populus trichocarpa*.

**Table S3.** The Cas9/gRNA-targeted mutations in both *PtrCHL11* and 2 genes of *Populus trichocarpa*.

**Table S4.** Analysis of potential off-target sites among the Cas9/gRNA-induced *ptrchli1* mutants.

**Table S5.** The Cas9/gRNA-targeted mutations in *PtrCesA4*, *7A*, *7B*, *8A*, *8B*, *7A/B* and *8A/B* genes of *Populus trichocarpa*.

**Table S6.** Analysis of potential off-target sites among the Cas9/gRNA-induced *ptrcesa* mutants

**Table S7.** Inheritance of the Cas9/gRNA-induced mutations in progeny of *ptrcesa4*, *7a/b* and *8a/b* mutants through asexual propagation methods.

**Table S8.** Inheritance of the Cas9/gRNA-induced mutations in the progeny of the *ptrcesa* lines.

**Fig. S1 Cas9/gRNA system and stepwise protocol in Nisqually-1.** (a) Illustration of the cloning of two gRNA expression cassettes into the Cas9/gRNA binary vector using Golden Gate ligation. *zCas9*, Zea mays codon-optimized Cas9; U6-26p and U6-29p, two *Arabidopsis* U6 gene promoters; U6-26t, U6-26 terminator with the downstream sequence; SpR, spectinomycin resistance gene; Hyg, hygromycin resistance gene. (b) Production of hygromycin-resistant transgenic plantlets using *Agrobacterium*-mediated transformation of Nisqually-1. Scale bars show 1 or 5 cm. (c) Identification of transgenic plantlets by using a genomic DNA PCR analysis of the *zCas* and *Hyg* genes in all 16 transgenic lines (#) and wild-type (WT). *Actin2* was used as an internal control. (d) A flow chart of the Cas9/gRNA-based mutagenesis in Nisqually-1.

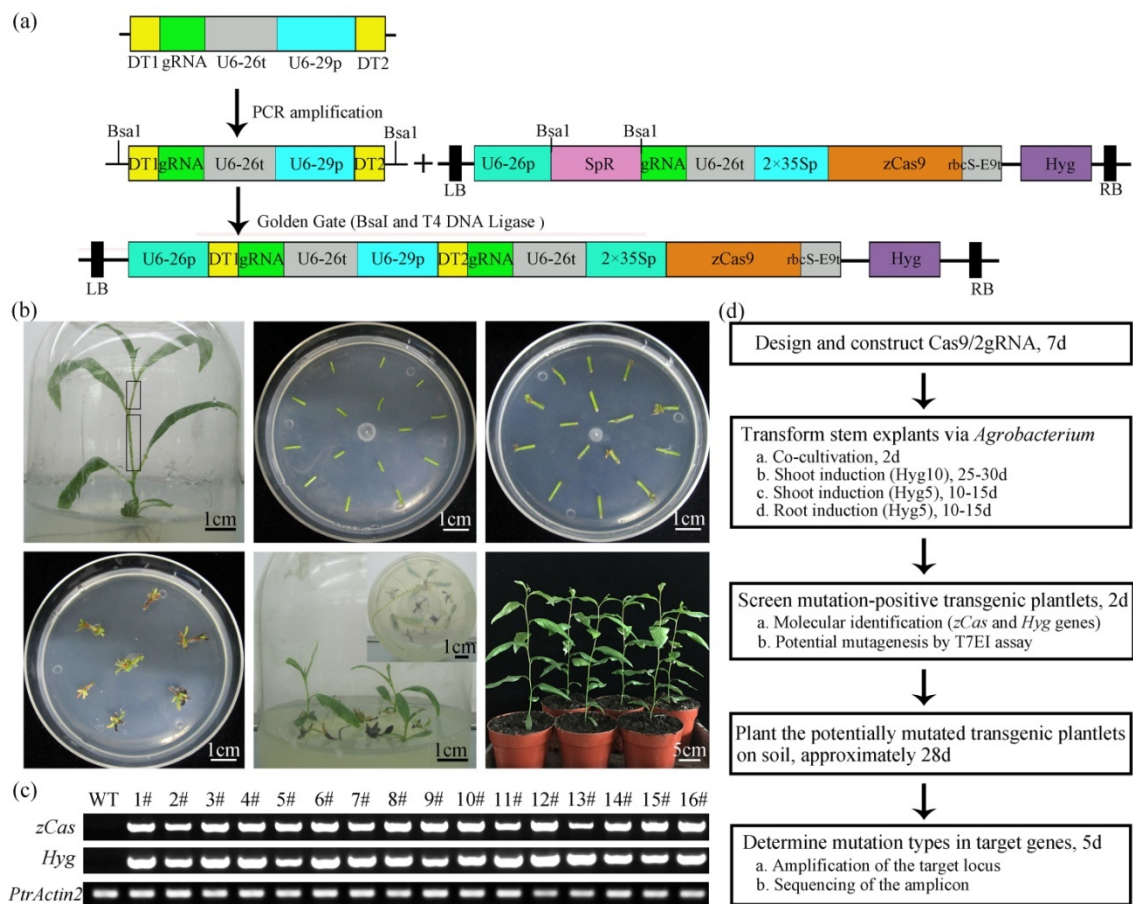



**Fig. S3 Cas9/gRNA-induced mutations in *PtrCesA7A*, *PtrCesA7B*, *PtrCesA8A*, and *PtrCesA8B* genes of *Populus trichocarpa*.** (a) Sixteen gRNAs were designed in *PtrCesA7A*, *PtrCesA7B*, *PtrCesA8A* and *PtrCesA8B* genes. Nucleotides in blue and red represent the target sites. (b) Characterization of the target site mutations in 12 *ptrcesa* mutants (*ptrcesa7a-1#*, -4# and -7#; *ptrcesa7b-2#*, -4# and -5#; *ptrcesa8a-1#*, -3# and -4#; *ptrcesa8b-2#*, -3# and -5#). Dashes and lowercase letters represent the deletion and insertion of nucleotides. Mutation types are indicated on the right. (c) The deduced amino acids of protein-coding regions from the Cas9/gRNA-edited genes in 12 *ptrcesa* mutants (*ptrcesa7a-1#*, -4# and -7#; *ptrcesa7b-2#*, -4# and -5#; *ptrcesa8a-1#*, -3# and -4#; *ptrcesa8b-2#*, -3# and -5#). The scissors indicate protein-coding termination.

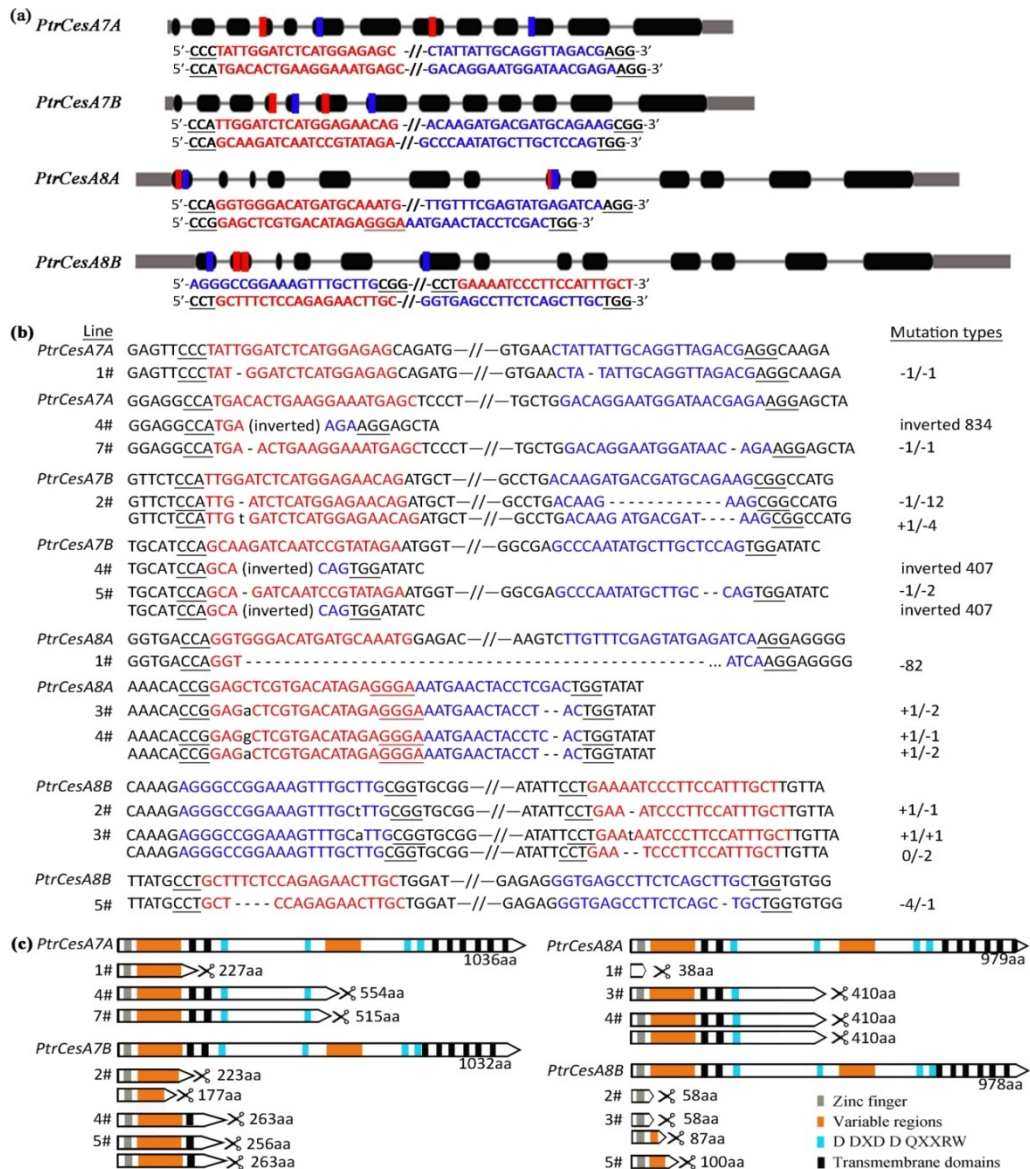



**Fig. S6 Characterization of *ptrcesa4*, *7a/b*, *8a/b*, *7a*, *7b*, *8a*, and *8b* mutants.** (a) Morphology of *ptrcesa7a*, *7b*, *8a*, *8b*, and wild-type (WT) young trees grown for 3 months in a greenhouse. (b) 6-month-old *ptrcesa4*, *7a/b* and *8a/b* mutant trees grown in a greenhouse. (c-d) Brittleness properties in stems of WT and *ptrcesa* mutants. Scale bars: (a-b) 5 cm; (c-d) 1 cm.

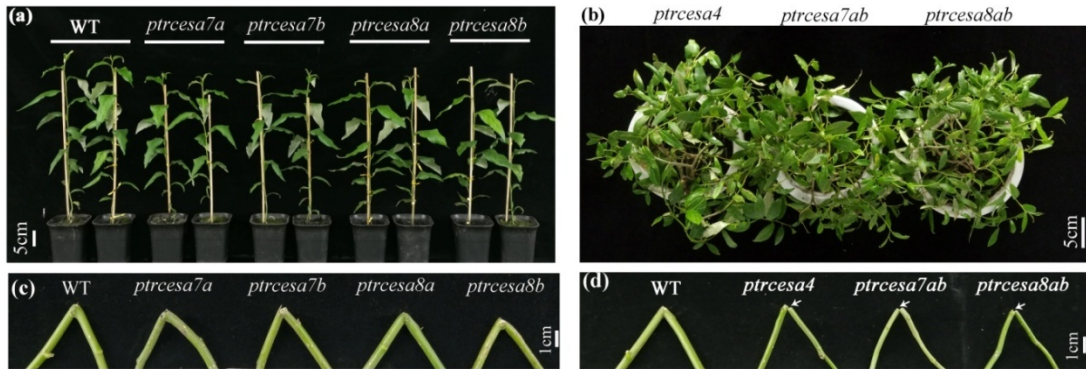



**Fig. S7 Observation of stem internodes, mature leaves, and roots of 3-month-old *ptrcesa4*, *7a/b*, and *8a/b* mutants.** (a-b) Stem diameter and internode length of wild-type (WT) and *ptrcesa* mutants. (c-d) Mature leaves and leaf areas of WT and *ptrcesa* mutants. (e-f) Roots and root biomass of WT and *ptrcesa* mutants. (g) Scanning electron microscopy of leaf epidermal cells in WT and *ptrcesa* mutants. The pavement cells were indicated in red. Scale bars: (c, e) 2 cm; (g) 50  $\mu$ m. Values are means  $\pm$  SD (n = 3). Asterisks denote significant difference from WT by Student's *t*-test: \*\* $P < 0.01$ , \*\*\* $P < 0.001$ .

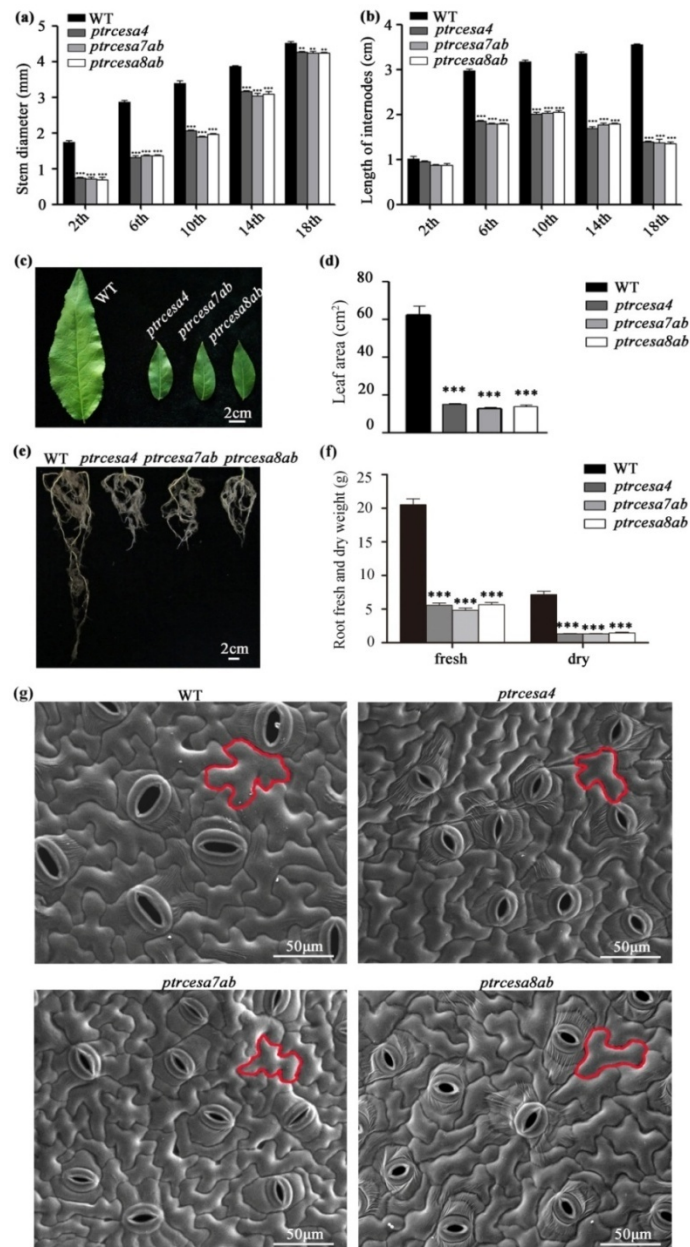

**Fig. S8 Anatomic analysis of different stem internodes from WT, *ptrcesa4*, *7a/b*, and *8a/b* mutants.** Cross-sections from the 2<sup>nd</sup>, 4<sup>th</sup>, 6<sup>th</sup>, 8<sup>th</sup>, 10<sup>th</sup>, 12<sup>th</sup>, 14<sup>th</sup>, 16<sup>th</sup>, and 18<sup>th</sup> stem internodes (IN) were stained with toluidine blue. Scale bars: 200  $\mu$ m.

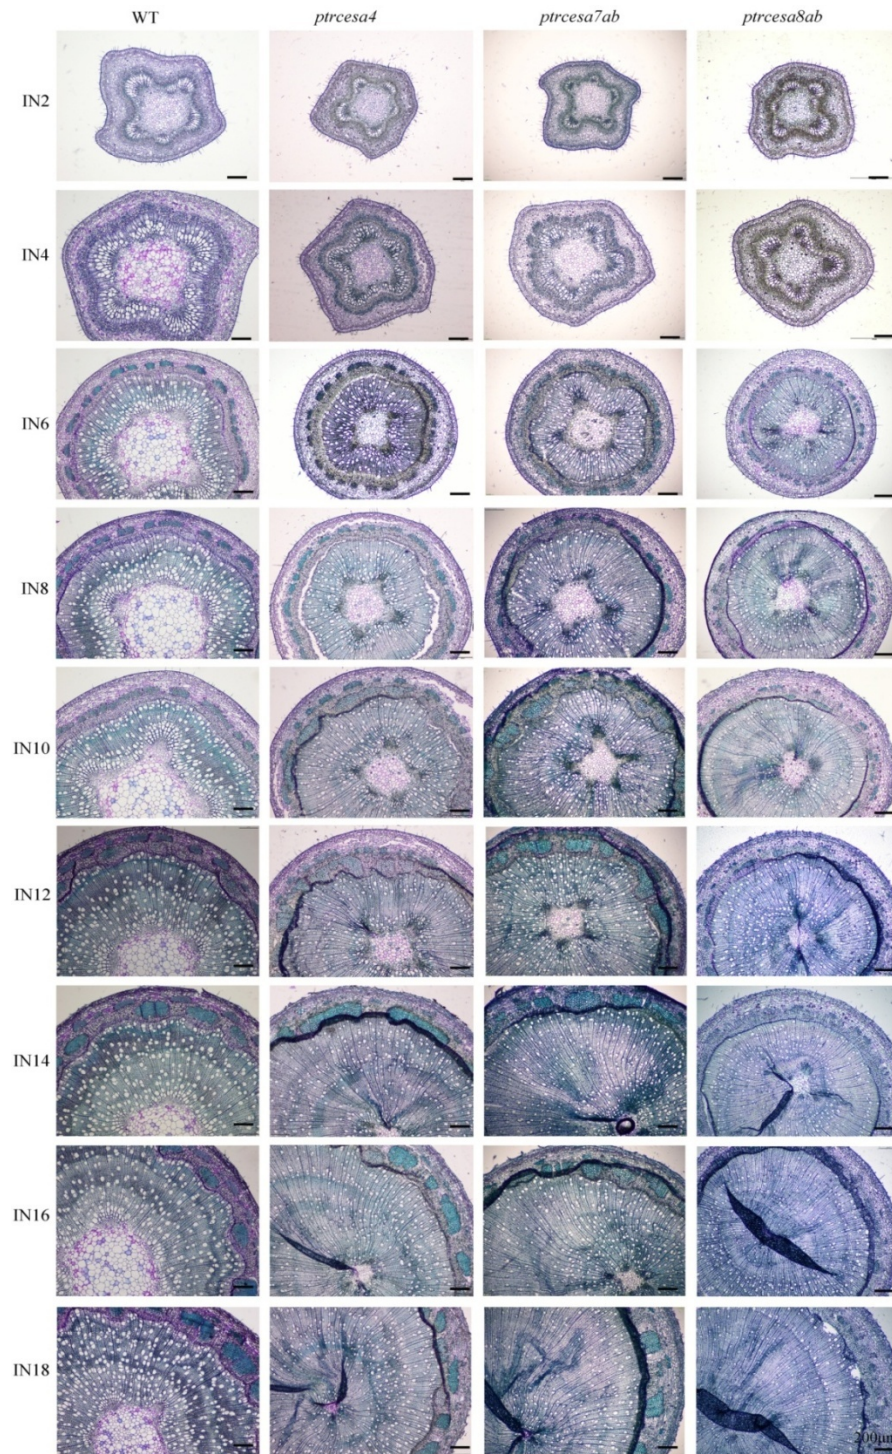

**Fig. S9 Anatomic analysis of different stem internodes from WT, *ptrcesa7a*, *7b*, *8a*, and *8b* mutants.** Cross-sections from the 10<sup>th</sup>, 14<sup>th</sup>, 16<sup>th</sup>, and 18<sup>th</sup> stem internodes (IN) were stained with toluidine blue. Scale bars: 100  $\mu$ m.

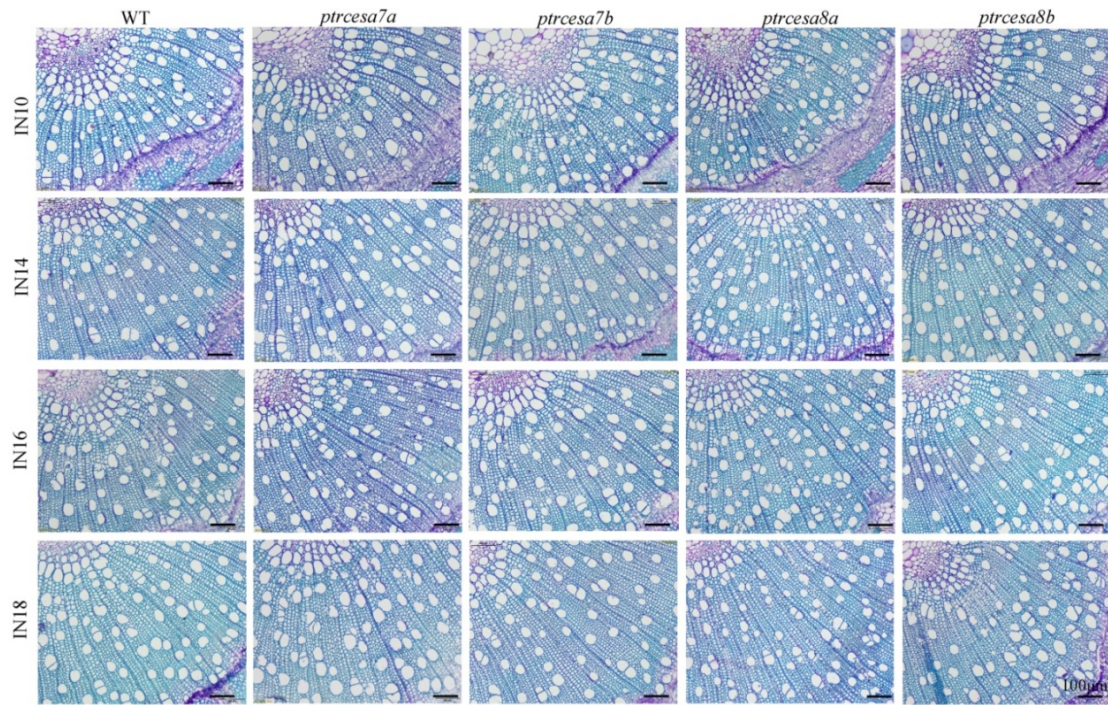

**Fig. S10 Observation of pith parenchyma in WT, *ptrcesa4*, *7a/b*, and *8a/b* mutants.** Scanning electron microscopy images of pith parenchyma in basal stem cross-sections of *ptrcesa* mutant and wild-type (WT) young trees. Upper and lower panels were from 2-month-old and 3-month-old *ptrcesa* mutant and WT trees, respectively. Scale bars: 20  $\mu$ m.

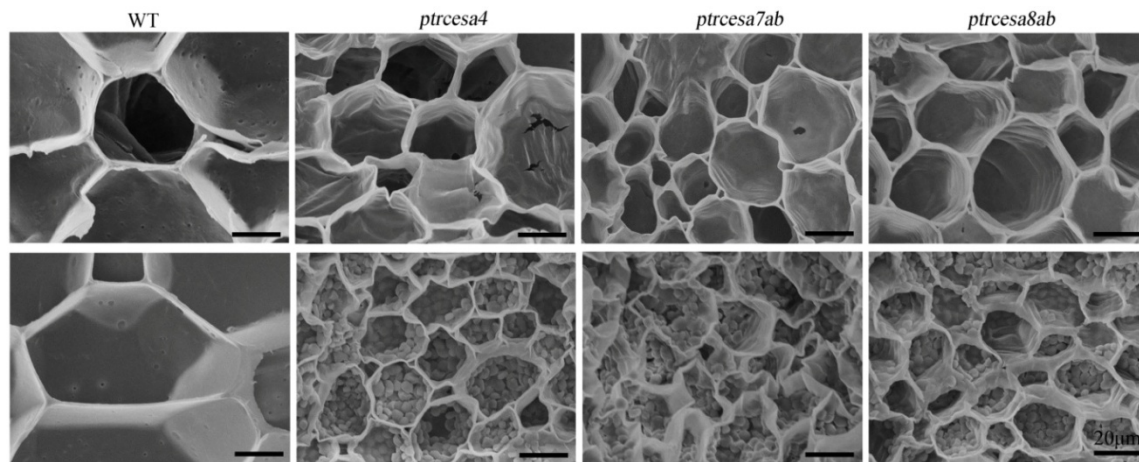

**Fig. S11 Wall thickness of xylem and phloem fibres in the basal stems of 6-month-old WT and *ptrcesa* mutants.** Xylem-I and -II indicated the developing and mature xylem, respectively. Values are means  $\pm$  SD of three replicates. Each replicate contained  $\sim$ 100 measurements. Asterisks denote a significant difference from WT by Student's *t*-test: \*\*\* $P < 0.001$ .

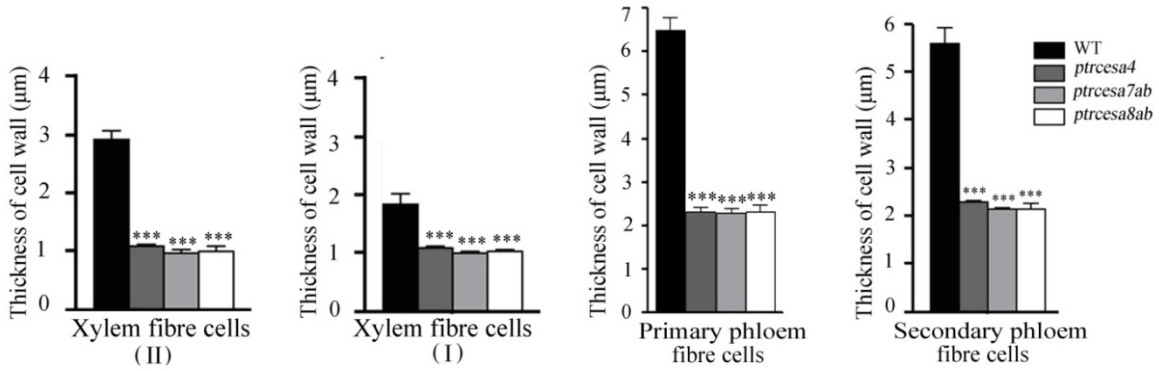

**Fig. S12 Microscopic analysis of the disaggregated xylem fibres and vessels in WT, *ptrcesa4*, *7a/b*, and *8a/b* mutants.** (a-b) Microscopic images of xylem fibers and vessels in the 20<sup>th</sup> stem internodes of the WT and *ptrcesa* mutants. Scale bars: 100  $\mu\text{m}$ . (c) The length of xylem fibers and vessels in WT and *ptrcesa* mutants. Values are means  $\pm$  SD of three replicates. Each replicate contained  $\sim$ 100 measurements. Asterisks denote significant difference from WT by Student's *t*-test: \*\*\* $P < 0.001$ .

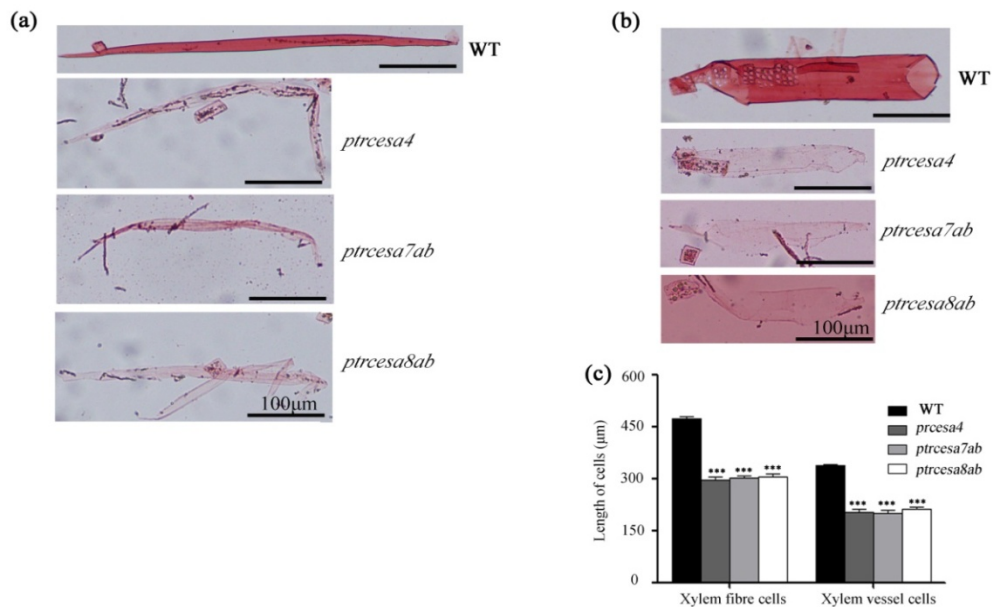

**Fig. S13 Induction of tension wood (TW) in WT and *ptrcesa* mutants under gravi-stimulation.** (a-f) WT, *ptrcesa8a*, *ptrcesa8b*, *ptrces8ab*, *ptrces7ab*, and *ptrcesa4* mutants straight grown for 4 months in a greenhouse were inclined by a 45° angle from the vertical direction to induce TW for 10 days. Scanning electron microscopy images were taken from the cross-sections of the 16<sup>th</sup> internode of each sample. Scale bars: 1mm.

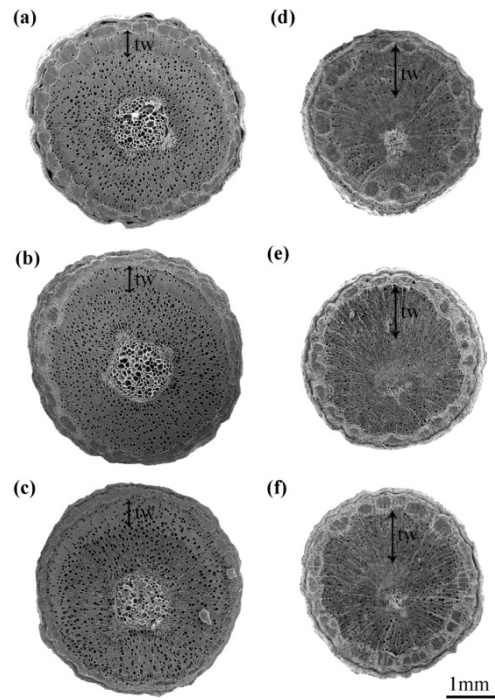

**Fig. S14 Immunolocalization of crystalline cellulose in tension and opposite wood (TW, OW) sides in WT, *ptrcesa4*, *7ab*, and *8ab* mutants.** The 8 $\mu$ m transverse cross-sections of the 16<sup>th</sup> internode from each sample were incubated with CBM3a-6 $\times$ His protein and anti-His antibody. CBM3a binds crystalline cellulose in plant cell wall. Signals (red) were detected with Alexa Fluor 633 goat anti-rat IgG. Arrowheads indicate G-layers of TW fibers in the WT. Scale bars: 10  $\mu$ m.

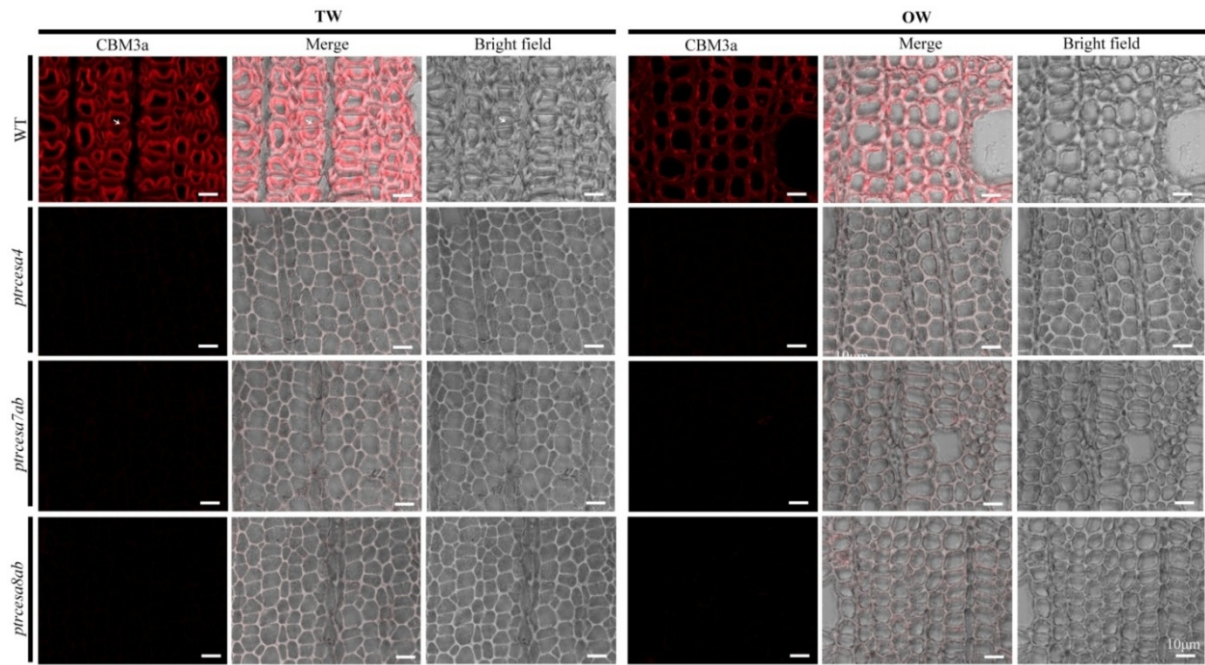

**Fig. S15 Immunolocalization of the xylan in tension and opposite wood (TW, OW) sides in WT, *ptrcesa4*, *7ab*, and *8ab* mutants.** The 8 $\mu$ m transverse cross-sections of the 16<sup>th</sup> internode from each sample were incubated with the LM10 antibody. LM10 binds the xylan in plant cell wall. Signals (red) were detected with Alexa Fluor 633 goat anti-rat IgG. Scale bars: 10  $\mu$ m.

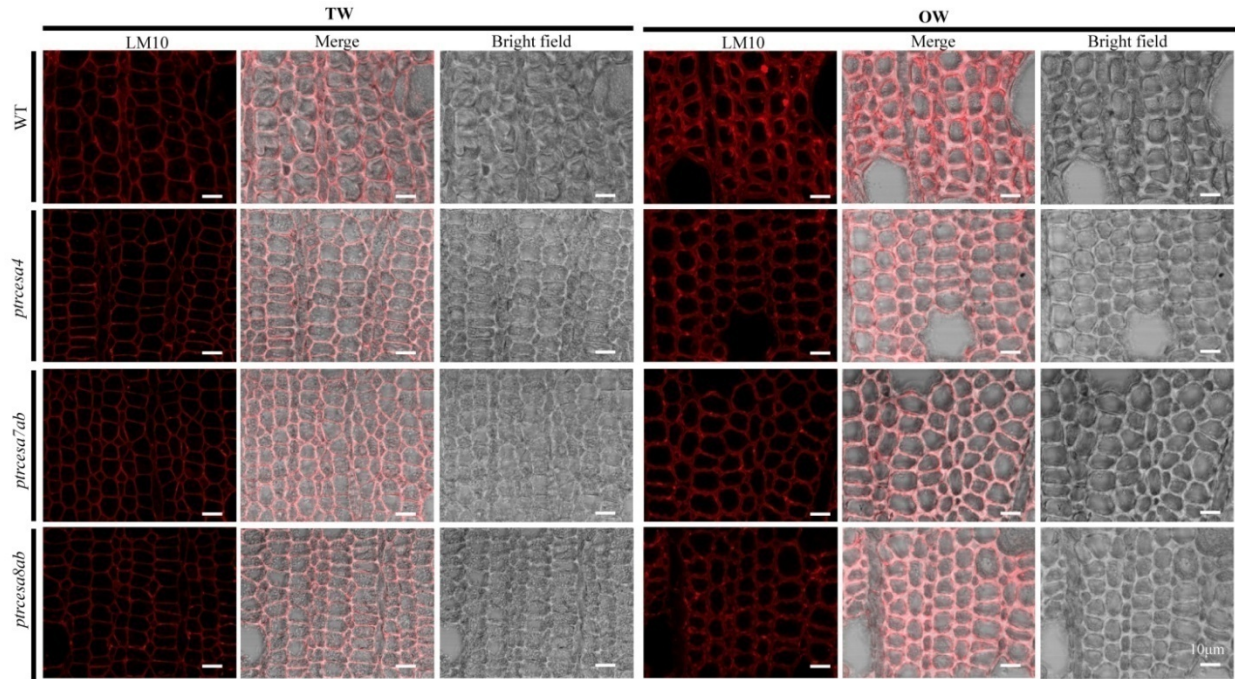

**Fig. S16 Immunolocalization of  $\beta$ -(1 $\rightarrow$ 4)-galactan in tension and opposite wood (TW, OW) sides in WT, *ptrcesa4*, *7ab*, and *8ab* mutants.** The 8 $\mu$ m transverse cross-sections of the 16<sup>th</sup> internode from each sample were incubated with the LM5 antibody. LM5 bind  $\beta$ -(1 $\rightarrow$ 4)-galactan in plant cell wall. Signals (red) were detected with Alexa Fluor 633 goat anti-rat IgG. The fibres of OW side showed no fluorescence in WT and mutants. Arrowheads indicate G-layers. Scale bars: 10  $\mu$ m.

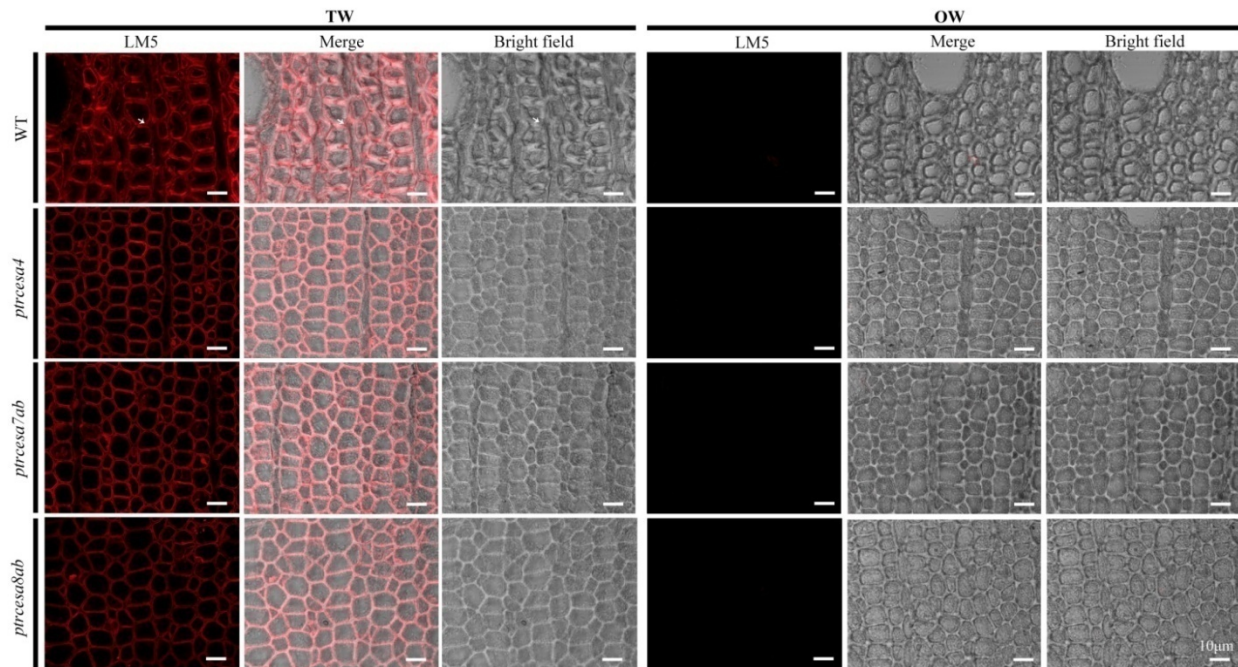



**Fig. S17 Immunolocalization of the mannan in tension and opposite wood (TW, OW) sides in WT, *ptrcesa4*, *7ab*, and *8ab* mutants.** The 8 $\mu$ m transverse cross-sections of the 16<sup>th</sup> internode from each sample were incubated with the LM21 antibody. LM21 binds the mannan in plant cell wall. Signals (red) were detected with Alexa Fluor 633 goat anti-rat IgG. Scale bars: 10  $\mu$ m.

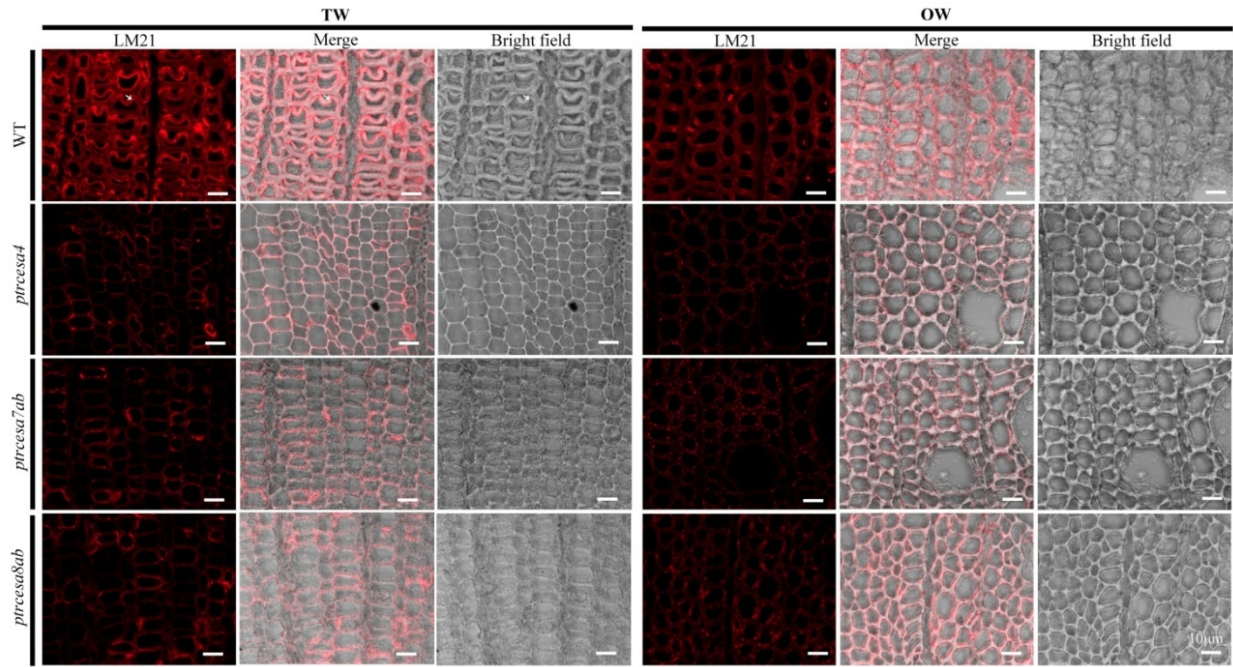

**Fig. S18 Immunolocalization of crystalline cellulose in phloem fibres of WT, *ptrcesa4*, *7ab*, and *8ab* mutants.** Primary and secondary phloem fibers (PPF, SPF) in the 8 $\mu$ m transverse cross-sections of the 20<sup>th</sup> internode from each sample were incubated with CBM3a-6 $\times$ His protein and anti-His antibody. Signals (red) were detected with Alexa Fluor 633 goat anti-rat IgG. CBM3a binds crystalline cellulose in plant cell wall. Scale bars: 10  $\mu$ m.

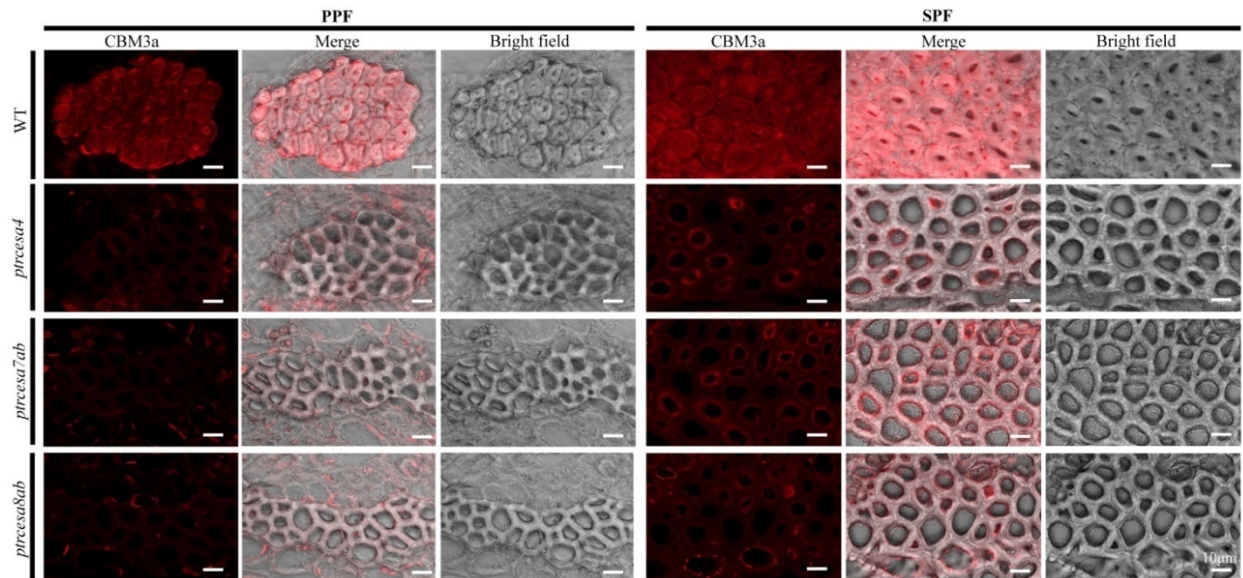

**Fig. S19 Immunolocalization of  $\beta$ -(1 $\rightarrow$ 4)-galactan in phloem fibres of WT, *ptrcesa4*, *7ab*, and *8ab* mutants.** Primary and secondary phloem fibers (PPF, SPF) in the 8 $\mu$ m transverse cross-sections of the 20<sup>th</sup> internode from each sample were incubated with LM5 antibody. Signals (red) were detected with Alexa Fluor 633 goat anti-rat IgG. LM5 binds  $\beta$ -(1 $\rightarrow$ 4)-galactan in plant cell wall. Scale bars: 10  $\mu$ m.

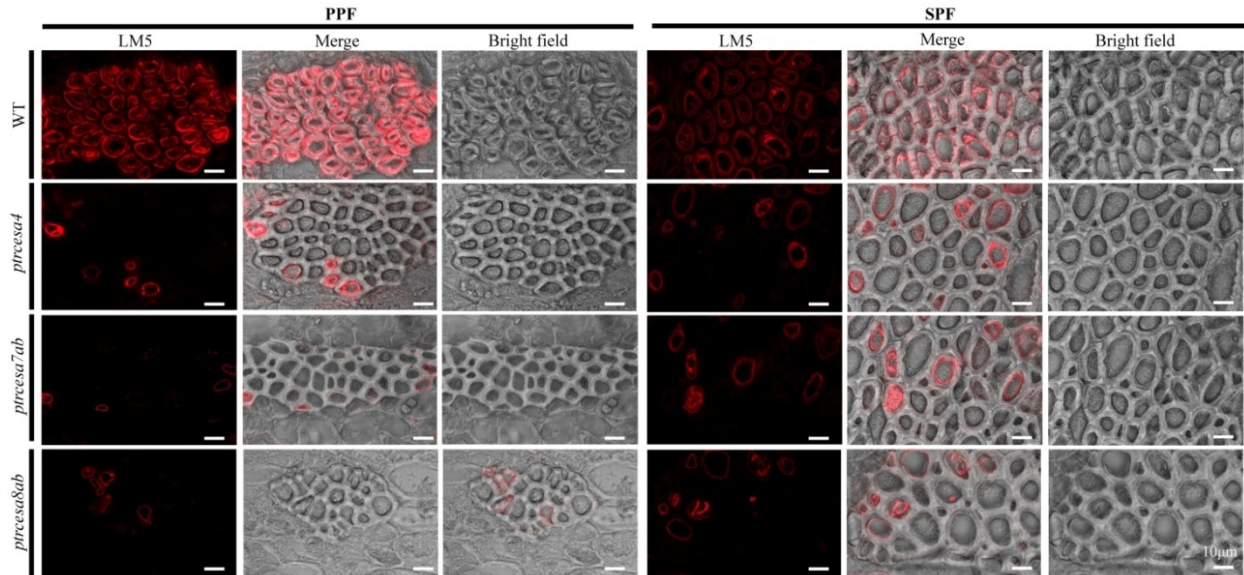

**Fig. S20 Immunolocalization of the mannan in phloem fibres of WT, *ptrcesa4*, *7ab*, and *8ab* mutants.** Primary and secondary phloem fibers (PPF, SPF) in the 8  $\mu\text{m}$  transverse cross-sections of the 20<sup>th</sup> internode from each sample were incubated with LM5 antibody. Signals (red) were detected with Alexa Fluor 633 goat anti-rat IgG. LM21 binds the mannan in the plant cell wall. Scale bars: 10  $\mu\text{m}$ .

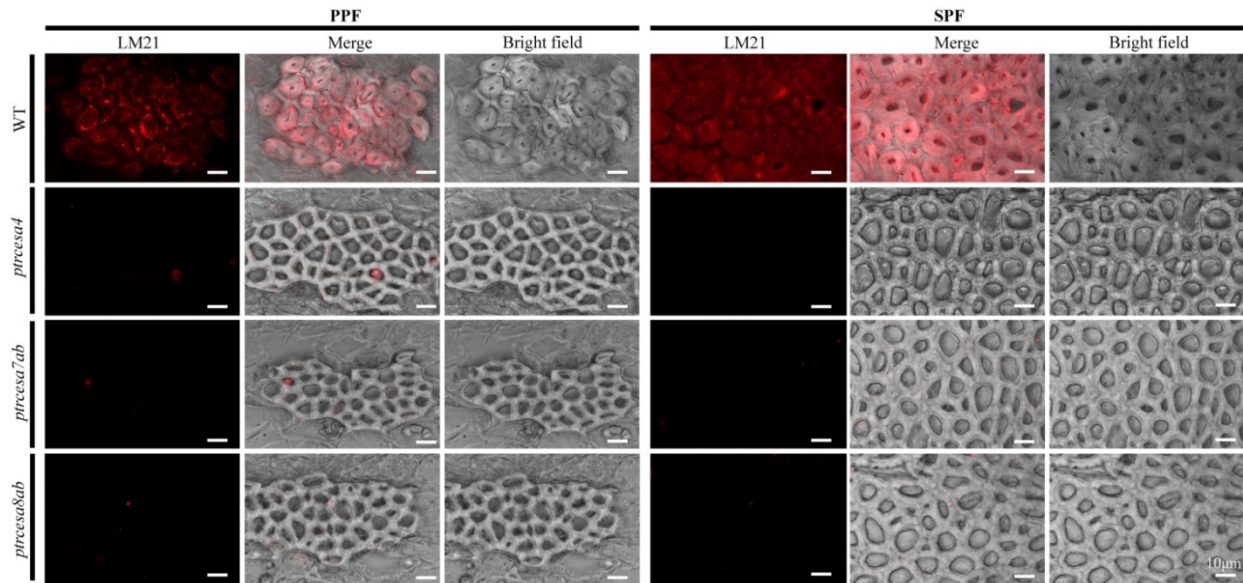

**Fig. S21 Immunolocalization of the xylan in phloem fibres of WT, *ptrcesa4*, *7ab*, and *8ab* mutants.** Primary and secondary phloem fibers (PPF, SPF) in the 8  $\mu\text{m}$  transverse cross-sections of the 20<sup>th</sup> internode from each sample were incubated with LM5 antibody. Signals (red) were detected with Alexa Fluor 633 goat anti-rat IgG. LM10 binds the xylan in plant cell wall. Scale bars: 10  $\mu\text{m}$ .

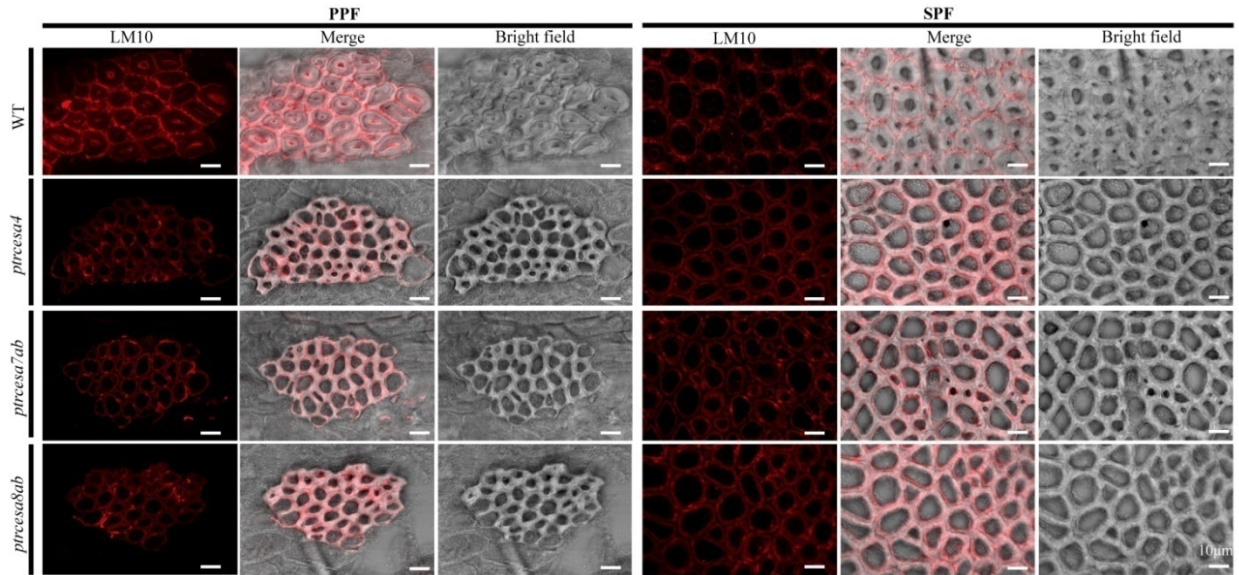

**Fig. S22 Lignin phloroglucinol staining in WT, *ptrcesa4*, *7ab*, and *8ab* mutants.** (a-b) Cross-sections of the 10<sup>th</sup> stem internodes. (c) Cross-sections of the 8<sup>th</sup> leaf petioles (from apical bud) from WT and *ptrcesa* mutants. Scale bars: (a) 500  $\mu\text{m}$ ; (b) 200  $\mu\text{m}$ ; (c) 100  $\mu\text{m}$ .

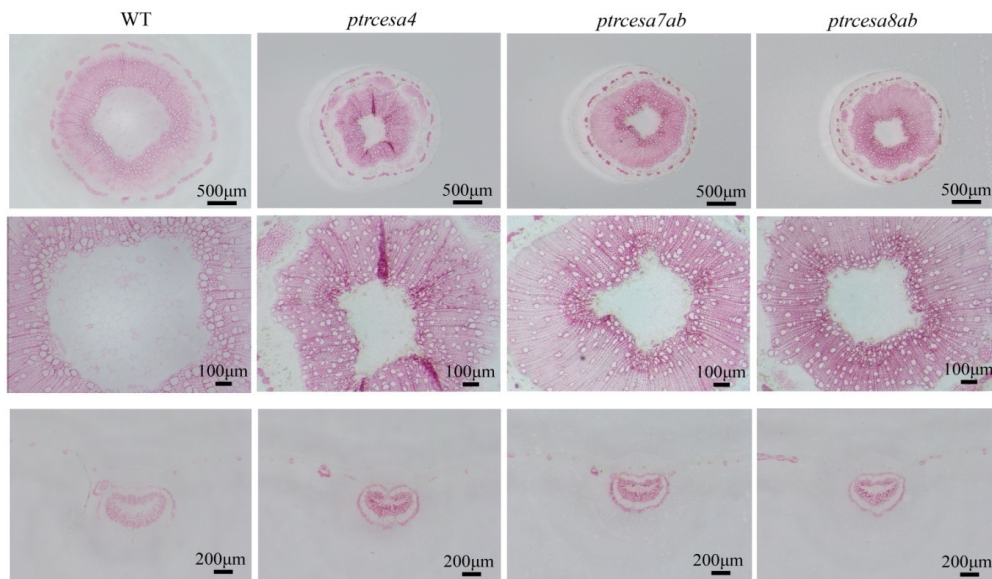

**Fig. S23 Crystalline cellulose and lignin content in woods of WT, *ptrcesa7a*, *7b*, *8a*, and *8b* mutants.** Values are means  $\pm$  SD (n = 3). Asterisks denote significantly different from WT by Student's *t*-test: \**P* < 0.05, \*\**P* < 0.01, \*\*\**P* < 0.001.

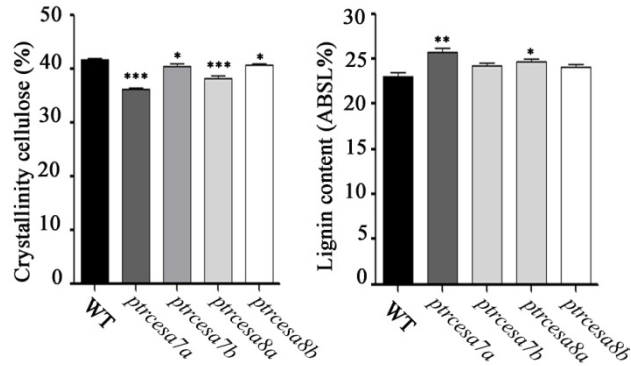

**Methods S1 Analysis of putative Cas9/gRNA off-target sites.** Putative gRNA off-target sites were identified by a BLASTN search using a target sequence in the *P. trichocarpa* genome. The final off-target sites were selected according to the following criteria: two to three mismatches in the PAM-proximal region, four to five mismatches within the PAM-proximal region, or one to two mismatches in the PAM. Specific primers (Table S1) flanking the off-target sites were used to amplify the corresponding loci, and the PCR amplicons were sequenced as described above. Eventually, 8 potential off-target sites for gCHLI1-a and gCHLI1-b were analyzed in 6 arbitrarily chosen *ptrchli1* mutants, and 25 potential off-target sites were evaluated in *ptrcesa4-1#*, *4-2#* and *4-6#*, *ptrcesa7ab-3#*, *7ab-7#* and *7ab-13#*, and *ptrcesa8ab-1#*, *8ab-4#* and *8ab-8#*. These 9 knockout mutants were used for the subsequent phenotypic analysis.

**Methods S2 RNA extraction and RT-PCR analysis.** Total RNA was isolated using the pBIOZOL Plant Total RNA Extraction Reagent (Bio-Flux, China). First-strand cDNA synthesis was performed with 2  $\mu$ g RNA using the PrimeScript RT Reagent Kit with gDNA Eraser (TaKaRa, China) according to the manufacturer's procedure. Reverse transcription PCR (RT-PCR) was employed to analyze the expression of *PtrCesA4*, *7A*, *7B*, *8A* and *8B* genes in the *ptrcesa* mutants. RT-PCR analysis was performed for three biological replicates each sample. The *PtrActin2* gene was used as a reference control. The PCR conditions were set as follows: 3 min at 95°C; 28 cycles of 30 s at 95°C, 30 s at 62°C and 30 s at 72°C; and 7 min at 72°C.

**Methods S3 Scanning electron microscopy (SEM) of leaf epidermal cells.** Fresh 6<sup>th</sup> leaves below the terminal buds of 3-month-old mutant and wild-type young trees were immediately frozen in liquid nitrogen and stored until observation. These samples were laid on a copper sheet (1.5 cm × 2 cm), transferred to an SEM chamber and scanned to produce micrographs. These images were used to determine the shapes and sizes of the epidermal cells.

**Methods S4 Wood fibre and vessel cell length analysis.** The lengths of the wood fibres and vessel cells were determined according to the previously described method (Lautner *et al.*, 2007) with minor modifications. The 20<sup>th</sup> stem internodes of 6-month-old wild-type and mutant trees were peeled, cut into small pieces, and incubated in a maceration solution (10% HNO<sub>3</sub> and 10% CrO<sub>3</sub> in v/v, 1:1) for 2-4 h at 60 °C. Thereafter, each stem internode was rinsed lightly with water, and the libriform fibres and vessel cells were disaggregated into the water by oscillation. After staining with 0.1% acid magenta, images were taken under a light microscope (Olympus, BX43). The lengths of the wood fibres and vessel cells were measured using ImageJ software.

#### **References**

**Lautner S, Ehlting B, Windeisen E, Rennenberg H, Matyssek R, Fromm J. 2007.** Calcium nutrition has a significant influence on wood formation in poplar. *New Phytologist* **173**: 743-752.

**Table S1** Primers used in this study.

| Purpose                                            | Primer Name          | Sequence (5'-3')                             |
|----------------------------------------------------|----------------------|----------------------------------------------|
| <b>Primers for CRISPR/Cas9 vector construction</b> |                      |                                              |
| <b>Cas9/gRNA-PtrCHLI1</b>                          | DT1-BsF/PtrCHLI1     | ATATATGGTCTCGATTGTTACTTCCAGAAATTAAGGGTT      |
|                                                    | DT1-F0/PtrCHLI1      | TGTTACTTCCAGAAATTAAGGGTTTATAGAGCTAGAAATAGC   |
|                                                    | DT2-R0/PtrCHLI1      | AACGAAAGTCCACCACTGTTAGCAATCTCTTAGTCGACTCTAC  |
|                                                    | DT2-BsR/PtrCHLI1     | ATTATTGGTCTCTAAACGAAAGTCCACCACTGTTAGC        |
| <b>Cas9/gRNA-PtrCHLI1/2-1</b>                      | DT1-BsF/PtrCHLI1/2-1 | ATATATGGTCTCGATTGTTCTTGCTAAAGCTAATAGGTT      |
|                                                    | DT1-F0/PtrCHLI1/2-1  | TGTTCTTGCTAAAGCTAATAGGTTTATAGAGCTAGAAATAGC   |
|                                                    | DT2-R0/PtrCHLI1/2-1  | AACAAGATTGGAGGTGTCATGCAATCTCTTAGTCGACTCTAC   |
|                                                    | DT2-BsR/PtrCHLI1/2-1 | ATTATTGGTCTCTAAACAAGATTGGAGGTGTCATGC         |
| <b>Cas9/gRNA-PtrCHLI1/2-2</b>                      | DT1-BsF/PtrCHLI1/2-2 | ATATATGGTCTCGATTGTGCGATGGGTATTGAAGTCAGTT     |
|                                                    | DT1-F0/PtrCHLI1/2-2  | TGTCGATGGGTATTGAAGTCAGTTTATAGAGCTAGAAATAGC   |
|                                                    | DT2-R0/PtrCHLI1/2-2  | AACTTTGCTGCTATAGTAGGGCCAATCTCTTAGTCGACTCTAC  |
|                                                    | DT2-BsR/PtrCHLI1/2-2 | ATTATTGGTCTCTAAACTTTGCTGCTATAGTAGGGCC        |
| <b>Cas9/gRNA-PtrCesA4-1</b>                        | DT1-BsF/PtrCesA4-1   | ATATATGGTCTCGATTGATACGATGCTTATGCATTGGTT      |
|                                                    | DT1-F0/PtrCesA4-1    | TGATACGATGCTTATGCATTGGTTTATAGAGCTAGAAATAGC   |
|                                                    | DT2-R0/PtrCesA4-1    | AACATTCGTCGGCCTTTTCGTCATCTCTTAGTCGACTCTAC    |
|                                                    | DT2-BsR/PtrCesA4-1   | ATTATTGGTCTCTAAACATTCGTCGGCCTTTTCGTC         |
| <b>Cas9/gRNA-PtrCesA4-2</b>                        | DT1-BsF/PtrCesA4-2   | ATATATGGTCTCGATTGATCTGTGTTAGAAGTTCGAGTT      |
|                                                    | DT1-F0/PtrCesA4-2    | TGATCTGTGTTAGAAGTTCGAGTTTATAGAGCTAGAAATAGC   |
|                                                    | DT2-R0/PtrCesA4-2    | AACCCTCAAGTCCCTTGGAGGACAATCTCTTAGTCGACTCTAC  |
|                                                    | DT2-BsR/PtrCesA4-2   | ATTATTGGTCTCTAAACCCTCAAGTCCCTTGGAGGAC        |
| <b>Cas9/gRNA-PtrCesA7A-1</b>                       | DT1-BsF/PtrCesA7A-1  | ATATATGGTCTCGATTGTATTATTGCAGGTTAGACGGTT      |
|                                                    | DT1-F0/PtrCesA7A-1   | TGTATTATTGCAGGTTAGACGGTTTATAGAGCTAGAAATAGC   |
|                                                    | DT2-R0/PtrCesA7A-1   | AACTATTGGATCTCATGGAGAGCAATCTCTTAGTCGACTCTAC  |
|                                                    | DT2-BsR/PtrCesA7A-1  | ATTATTGGTCTCTAAACTATTGGATCTCATGGAGAGC        |
| <b>Cas9/gRNA-PtrCesA7A-2</b>                       | DT1-BsF/PtrCesA7A-2  | ATATATGGTCTCGATTGACAGGAATGGATAACGAGAGTT      |
|                                                    | DT1-F0/PtrCesA7A-2   | TGACAGGAATGGATAACGAGAGTTTATAGAGCTAGAAATAGC   |
|                                                    | DT2-R0/PtrCesA7A-2   | AACTGACACTGAAGGAAATGAGCAATCTCTTAGTCGACTCTAC  |
|                                                    | DT2-BsR/PtrCesA7A-2  | ATTATTGGTCTCTAAACTGACACTGAAGGAAATGAGC        |
| <b>Cas9/gRNA-PtrCesA7B-1</b>                       | DT1-BsF/PtrCesA7B-1  | ATATATGGTCTCGATTGCAAGATGACGATGCAGAAGGTT      |
|                                                    | DT1-F0/PtrCesA7B-1   | TGCAAGATGACGATGCAGAAGGTTTATAGAGCTAGAAATAGC   |
|                                                    | DT2-R0/PtrCesA7B-1   | AACTTGGATCTCATGGAGAACAACAATCTCTTAGTCGACTCTAC |
|                                                    | DT2-BsR/PtrCesA7B-1  | ATTATTGGTCTCTAAACTTGGATCTCATGGAGAACAC        |
| <b>Cas9/gRNA-PtrCesA7B-2</b>                       | DT1-BsF/PtrCesA7B-2  | ATATATGGTCTCGATTGCCCAATATGCTTGCTCCAGGTT      |
|                                                    | DT1-F0/PtrCesA7B-2   | TGCCCAATATGCTTGCTCCAGGTTTATAGAGCTAGAAATAGC   |
|                                                    | DT2-R0/PtrCesA7B-2   | AACGCAAGATCAATCCGTATAGCAATCTCTTAGTCGACTCTAC  |
|                                                    | DT2-BsR/PtrCesA7B-2  | ATTATTGGTCTCTAAACGCAAGATCAATCCGTATAGC        |
| <b>Cas9/gRNA-PtrCesA8A-1</b>                       | DT1-BsF/PtrCesA8A-1  | ATATATGGTCTCGATTGTGTTTCGAGTATGAGATCAGTT      |
|                                                    | DT1-F0/PtrCesA8A-1   | TGTGTTTCGAGTATGAGATCAGTTTATAGAGCTAGAAATAGC   |
|                                                    | DT2-R0/PtrCesA8A-1   | AACGGTGGGACATGATGCAAATCAATCTCTTAGTCGACTCTAC  |
|                                                    | DT2-BsR/PtrCesA8A-1  | ATTATTGGTCTCTAAACGGTGGGACATGATGCAAATC        |
| <b>Cas9/gRNA-PtrCesA8A-2</b>                       | DT1-BsF/PtrCesA8A-2  | ATATATGGTCTCGATTGGGAAATGAACTACCTCGACGTT      |
|                                                    | DT1-F0/PtrCesA8A-2   | TGGGAAATGAACTACCTCGACGTTTATAGAGCTAGAAATAGC   |
|                                                    | DT2-R0/PtrCesA8A-2   | AACGAGCTCGTGACATAGAGGGCAATCTCTTAGTCGACTCTAC  |



|                                                           |                             |                                             |
|-----------------------------------------------------------|-----------------------------|---------------------------------------------|
|                                                           | DT2-BsR/PtrCesA8A-2         | ATTATTGGTCTCTAAACGAGCTCGTGACATAGAGGGC       |
| <b>Cas9/gRNA-PtrCesA8B-1</b>                              | DT1-BsF/PtrCesA8B-1         | ATATATGGTCTCGATTGGGGCCGAAAGTTTGCTGGTT       |
|                                                           | DT1-F0/PtrCesA8B-1          | TGGGGCCGAAAGTTTGCTGGTTTTAGAGCTAGAAATAGC     |
|                                                           | DT2-R0/PtrCesA8B-1          | AACGAAAATCCCTTCCATTTGCCAATCTCTTAGTCGACTCTAC |
|                                                           | DT2-BsR/PtrCesA8B-1         | ATTATTGGTCTCTAAACGAAAATCCCTTCCATTTGCC       |
| <b>Cas9/gRNA-PtrCesA8B-2</b>                              | DT1-BsF/PtrCesA8B-2         | ATATATGGTCTCGATTGGTGAGCCTTCTCAGCTTGCGTT     |
|                                                           | DT1-F0/PtrCesA8B-2          | TGGTGAGCCTTCTCAGCTTGCGTTTTAGAGCTAGAAATAGC   |
|                                                           | DT2-R0/PtrCesA8B-2          | AACGCTTTCTCCAGAGAACTTGCAATCTCTTAGTCGACTCTAC |
|                                                           | DT2-BsR/PtrCesA8B-2         | ATTATTGGTCTCTAAACGCTTTCTCCAGAGAACTTGC       |
| <b>Cas9/gRNA-PtrCesA7A/B-1</b>                            | DT1-BsF/PtrCesA7A/B-1       | ATATATGGTCTCGATTGCGCAAAGAAAGAGGGAGGGGTT     |
|                                                           | DT1-F0/PtrCesA7A/B-1        | TGCGCAAAGAAAGAGGGAGGGGTTTTAGAGCTAGAAATAGC   |
|                                                           | DT2-R0/PtrCesA7A/B-1        | AACTATCCAGTTTCTGAACCTGCAATCTCTTAGTCGACTCTAC |
|                                                           | DT2-BsR/PtrCesA7A/B-1       | ATTATTGGTCTCTAAACTATCCAGTTTCTGAACCTGC       |
| <b>Cas9/gRNA-PtrCesA7A/B-2</b>                            | DT1-BsF/PtrCesA7A/B-2       | ATATATGGTCTCGATTGTTTGTGACTTCAACTTTAAGTT     |
|                                                           | DT1-F0/PtrCesA7A/B-2        | TGTTTGTGACTTCAACTTTAAGTTTTAGAGCTAGAAATAGC   |
|                                                           | DT2-R0/PtrCesA7A/B-2        | AACCTTCTCGAGTCCAGCGGCAATCTCTTAGTCGACTCTAC   |
|                                                           | DT2-BsR/PtrCesA7A/B-2       | ATTATTGGTCTCTAAACCTTCTCGAGTCCAGCGGC         |
| <b>Cas9/gRNA-PtrCesA8A/B-1</b>                            | DT1-BsF/PtrCesA8A/B-1       | ATATATGGTCTCGATTGGTCCGCCGGAACAGCAGAGTT      |
|                                                           | DT1-F0/PtrCesA8A/B-1        | TGGTCCGCCGGAACAGCAGAGTTTTAGAGCTAGAAATAGC    |
|                                                           | DT2-R0/PtrCesA8A/B-1        | AACCTACAGAATAACAAATCCTCAATCTCTTAGTCGACTCTAC |
|                                                           | DT2-BsR/PtrCesA8A/B-1       | ATTATTGGTCTCTAAACCTACAGAATAACAAATCCTC       |
| <b>Cas9/gRNA-PtrCesA8A/B-2</b>                            | DT1-BsF/PtrCesA8A/B-2       | ATATATGGTCTCGATTGAACTGGTTGTGTTTTCAATGTT     |
|                                                           | DT1-F0/PtrCesA8A/B-2        | TGAACTGGTTGTGTTTTCAATGTTTTAGAGCTAGAAATAGC   |
|                                                           | DT2-R0/PtrCesA8A/B-2        | AACCAAGTAGGTCGAGATGTATCAATCTCTTAGTCGACTCTAC |
|                                                           | DT2-BsR/PtrCesA8A/B-2       | ATTATTGGTCTCTAAACCAAGTAGGTCGAGATGTATC       |
| <b>Primers used to identify Cas9-gRNAs targeted sites</b> |                             |                                             |
| <b>gCHLI1-a/b-identify</b>                                | gCHLI1-a/b-identify-F       | GCCACTAAACAATGCATCATTTTC                    |
|                                                           | gCHLI1-a/b-identify-R       | TCCTAGCTGAGGAAATTTGTTGC                     |
| <b>gCHLI1/2-a/b/c/d-identify</b>                          | gCHLI1/2-a/b/c/d-identify-F | TCGACCCTTCTCCAAACCTTCCA                     |
|                                                           | gCHLI1/2-a/b/c/d-identify-R | CCCTAGCTGAGGCAATTTGTTGC                     |
| <b>gCesA4-1/2-identify</b>                                | gCesA4-1/2-identify-F       | ATGGCTGGCCTTGTCACGGGCAG                     |
|                                                           | gCesA4-1/2-identify-R       | TGTCGACAGGATAATCAACGGAT                     |
| <b>gCesA4-3/4-identify</b>                                | gCesA4-3/4-identify-F       | GGTGAGTTGAAAGATTACTGAAT                     |
|                                                           | gCesA4-3/4-identify-R       | CTAGCACTCCACCCACATTGTT                      |
| <b>gCesA7A-a/b-identify</b>                               | gCesA7A-a/b-identify-F      | TCATTCTCTCGATCTTATCTTT                      |
|                                                           | gCesA7A-a/b-identify-R      | GGTTCTACACTAACTACAAACAA                     |
| <b>gCesA7A-c/d-identify</b>                               | gCesA7A-c/d-identify-F      | TTGTTTGTAGTTAGTGTAGAACC                     |
|                                                           | gCesA7A-c/d-identify-R      | ACTTCTAAGCAACAAGCAAACCTT                    |
| <b>gCesA7B-a/b/c/d-identify</b>                           | gCesA7B-a/b/c/d-identify-F  | GCATGGGATTCTCAAGCTGATTT                     |
|                                                           | gCesA7B-a/b/c/d-identify-R  | TATAGATGTCGATGCGAATTACG                     |
| <b>gCesA8A-a/b-identify</b>                               | gCesA8A-a/b-identify-F      | ATGATGGAATCTGGGGCTCCT                       |
|                                                           | gCesA8A-a/b-identify-R      | TGCATCATTAACCATTAACATT                      |
| <b>gCesA8A-c/d-identify</b>                               | gCesA8A-c/d-identify-F      | TCAAGAACATTAAGGTCTTGGGT                     |
|                                                           | gCesA8A-c/d-identify-R      | TATGATGATGCCAAGCCTTACTG                     |
| <b>gCesA8B-a/b-identify</b>                               | gCesA8B-a/b-identify-F      | ATGATGGAATCTGGGGCTCCT                       |
|                                                           | gCesA8B-a/b-identify-R      | AAACTTCATGGATTAAACTAGAA                     |
| <b>gCesA8B-c/d-identify</b>                               | gCesA8B-c/d-identify-F      | CTATAGGAAGCAAAAAATCTCAT                     |

|                                             |                        |                          |
|---------------------------------------------|------------------------|--------------------------|
|                                             | gCesA8B-c/d-identify-R | GGACTGCTAATAAATATTGAAGT  |
| gCesA7A-1/2-identify                        | gCesA7A-1/2-identify-F | TCATTCTCTTCGATCTTATCTTT  |
|                                             | gCesA7A-1/2-identify-R | GGTTCTACACTAACTACAAACAA  |
| gCesA7A-3/4-identify                        | gCesA7A-3/4-identify-F | CTGGACTAAAACAAACCCATGCT  |
|                                             | gCesA7A-3/4-identify-R | ACTTCTAAGCAACAAGCAAACCT  |
| gCesA7B-1/2-identify                        | gCesA7B-1/2-identify-F | GCATGGGATTCTCAAGCTGATTT  |
|                                             | gCesA7B-1/2-identify-R | TATAGATGTCGATGCGAATTACG  |
| gCesA7B-3/4-identify                        | gCesA7B-3/4-identify-F | CTGGCTTACCCCGTGTGTATGCT  |
|                                             | gCesA7B-3/4-identify-R | AAATACATTTTCAGAGCTACTGGA |
| gCesA8A-1/2-identify                        | gCesA8A-1/2-identify-F | AATGTTAATGGTTAATGATGCA   |
|                                             | gCesA8A-1/2-identify-R | TTATAATGCAGCATAGTGAATAT  |
| gCesA8A-3/4-identify                        | gCesA8A-3/4-identify-F | TCAAGAACATTAAGGTCTTGGGT  |
|                                             | gCesA8A-3/4-identify-R | AAATGTCATGGAAGCCCACATTG  |
| gCesA8B-1/2-identify                        | gCesA8B-1/2-identify-F | TTCTAGTTAATCCATGAAGTTT   |
|                                             | gCesA8B-1/2-identify-R | ATGAGATTTTTTGCTTCCTATAG  |
| gCesA8B-3/4-identify                        | gCesA8B-3/4-identify-F | ACTTCAATATTTATTAGCAGTCC  |
|                                             | gCesA8B-3/4-identify-R | AATGGGTAATGGGTAGCCTTG    |
| <b>Primers used to identify off-targets</b> |                        |                          |
| gCHLI1a-off-1                               | gCHLI1-a-off-1-F       | TCGACCCTTCTCCAAACCTTCCA  |
|                                             | gCHLI1-a-off-1-R       | CCCTAGCTGAGGCAATTTGTTGC  |
| gCHLI1a-off-2                               | gCHLI1-a-off-2-F       | CCACATTCTTAAGCATATTAATA  |
|                                             | gCHLI1-a-off-2-R       | TCACTTATATTCCTATCTACTC   |
| gCHLI1a-off-3                               | gCHLI1-a-off-3-F       | TTGTTCTAAGCGCGACCGTAC    |
|                                             | gCHLI1-a-off-3-R       | CAGAAGTGAAGTGAAGATGAG    |
| gCHLI1a-off-4                               | gCHLI1-a-off-4-F       | GCTTAGCTAGATGAATCGTTGT   |
|                                             | gCHLI1-a-off-4-R       | CATTGCAAATCTTGGAGACATG   |
| gCHLI1a-off-5                               | gCHLI1-a-off-5-F       | GCTGTACTCTTCATCGGAAGT    |
|                                             | gCHLI1-a-off-5-R       | ATACTGTGTTTTCAACTTGATCC  |
| gCHLI1b-off-1                               | gCHLI1-b-off-1-F       | TCGACCCTTCTCCAAACCTTCCA  |
|                                             | gCHLI1-b-off-1-R       | CCCTAGCTGAGGCAATTTGTTGC  |
| gCHLI1b-off-2                               | gCHLI1-b-off-2-F       | CCGTTCTACGATATTTATCGG    |
|                                             | gCHLI1-b-off-2-R       | CTCACGAACATGATACACTGAT   |
| gCHLI1b-off-3                               | gCHLI1-b-off-3-F       | GGCTAACGTCTCCTTCTGCA     |
|                                             | gCHLI1-b-off-3-R       | GTTCCTCTCTATATCCACACG    |
| gCesA4-1-off-1                              | gCesA4-1-off-1-F       | GAACCTGAGCTCTGTGCACTA    |
|                                             | gCesA4-1-off-1-R       | GAGACAATGTCAACAAGTCTC    |
| gCesA4-1-off-2                              | gCesA4-1-off-2-F       | CTTGTATTGATCCCATGGTTGT   |
|                                             | gCesA4-1-off-2-R       | AAGAAGTTACATCTTCGCAAGG   |
| gCesA4-3-off-1                              | gCesA4-3-off-1-F       | GCAGGCAAGGCTTGATGATATTG  |
|                                             | gCesA4-3-off-1-R       | CCGGATTCTACAATCTTCATGTG  |
| gCesA4-3-off-2                              | gCesA4-3-off-2-F       | GTGTTTAGCATTGTGATAGCGG   |
|                                             | gCesA4-3-off-2-R       | CAAGGTCTCTCGTTGAGAATTC   |
| gCesA4-4-off-1                              | gCesA4-4-off-1-F       | GTAATCATGTAGAGTGCAATGG   |
|                                             | gCesA4-4-off-1-R       | GCTTGACACACGTAGAACATC    |
| gCesA4-4-off-2                              | gCesA4-4-off-2-F       | GAACTTCTCGGCAAACCAAG     |
|                                             | gCesA4-4-off-2-R       | GCAAGTGAAGTGACAGGTT      |
| gCesA7A/B-1-off-1                           | gCesA7A/B-1-off-1-F    | GGATTGAGCAATGAGATTTC     |

|                                                   |                     |                           |
|---------------------------------------------------|---------------------|---------------------------|
|                                                   | gCesA7A/B-1-off-1-R | TGTAAGTGTTCATCCACTAGC     |
| <b>gCesA7A/B-1-off-2</b>                          | gCesA7A/B-1-off-2-F | CCTTCTTCTCAACAGCGATT      |
|                                                   | gCesA7A/B-1-off-2-R | AGACGATGGAGGAGATGCTT      |
| <b>gCesA7A/B-1-off-3</b>                          | gCesA7A/B-1-off-3-F | GGTCGTGTCAGTTAGGCTGG      |
|                                                   | gCesA7A/B-1-off-3-R | CAAGGCCAAATGTATTGCAATC    |
| <b>gCesA7A/B-1-off-4</b>                          | gCesA7A/B-1-off-4-F | GCTTGCATCCTCTGGCTATA      |
|                                                   | gCesA7A/B-1-off-4-R | CAATTAGGCGTTCATCTCCT      |
| <b>gCesA7A/B-1-off-5</b>                          | gCesA7A/B-1-off-5-F | GTACCTTGATTTGAATCTGCA     |
|                                                   | gCesA7A/B-1-off-5-R | TCCAAGAAATTCCTTGAGTGC     |
| <b>gCesA7A/B-1-off-6</b>                          | gCesA7A/B-1-off-6-F | GCTGTGCGATCTCTCAATCAAC    |
|                                                   | gCesA7A/B-1-off-6-R | GTCATAGCTGCTGCTGATTCT     |
| <b>gCesA7A/B-2-off-1</b>                          | gCesA7A/B-2-off-1-F | GATATGCCTCATTTCAATCCATG   |
|                                                   | gCesA7A/B-2-off-1-R | CTAATAGGCCTTGTTGACATCAC   |
| <b>gCesA7A/B-2-off-2</b>                          | gCesA7A/B-2-off-2-F | GCAAACATTATGGTGACGAC      |
|                                                   | gCesA7A/B-2-off-2-R | GCTGCCTTTGGTCATAACAAT     |
| <b>gCesA7A/B-3-off-1</b>                          | gCesA7A/B-3-off-1-F | GAAAGTACAACCTCCTTGCTA     |
|                                                   | gCesA7A/B-3-off-1-R | CTTGTTGCTGCTTCATTCCT      |
| <b>gCesA7A/B-3-off-2</b>                          | gCesA7A/B-3-off-2-F | GTTCATCATGCCAAATGAGGTA    |
|                                                   | gCesA7A/B-3-off-2-R | TGCACAGTGAATTTGAAATTACC   |
| <b>gCesA7A/B-3-off-3</b>                          | gCesA7A/B-3-off-3-F | GTTCATCATGCCAATTGAGGTA    |
|                                                   | gCesA7A/B-3-off-3-R | GCATAATCTAGAGACCAAGAAC    |
| <b>gCesA7A/B-3-off-4</b>                          | gCesA7A/B-3-off-4-F | ATAGCTATCCGTTTGCCTGTGA    |
|                                                   | gCesA7A/B-3-off-4-R | GAGAATTCTAAGGTATTTAGAC    |
| <b>gCesA7A/B-4-off-1</b>                          | gCesA7A/B-4-off-1-F | CATGCTAACACAAGAAGAAGG     |
|                                                   | gCesA7A/B-4-off-1-R | CATCAACACGAAGGCTGTTG      |
| <b>gCesA8A/B-2-off-1</b>                          | gCesA8A/B-2-off-1-F | CTAGGTGCTAACTACTCA        |
|                                                   | gCesA8A/B-2-off-1-R | GACGGTTCTCCTTCATTGTC      |
| <b>gCesA8A/B-2-off-2</b>                          | gCesA8A/B-2-off-2-F | GAAGCCATTGGCTGTGATTG      |
|                                                   | gCesA8A/B-2-off-2-R | CCGTTTTAGTCGCAACATAC      |
| <b>gCesA8A/B-3-off-1</b>                          | gCesA8A/B-3-off-1-F | GCACGAAGATTCCAATTGGA      |
|                                                   | gCesA8A/B-3-off-1-R | GTACAAGTAGTGGCAATGTGC     |
| <b>gCesA8A/B-3-off-2</b>                          | gCesA8A/B-3-off-2-F | GAAGTTAGGACACATGTCAA      |
|                                                   | gCesA8A/B-3-off-2-R | CTACCATGCTCTCGTTACGA      |
| <b>gCesA8A/B-3-off-3</b>                          | gCesA8A/B-3-off-3-F | GATGTTTCTATGGACGTCTA      |
|                                                   | gCesA8A/B-3-off-3-R | GATATCATTCCAATCAGAGCAA    |
| <b>gCesA8A/B-3-off-4</b>                          | gCesA8A/B-3-off-4-F | GACTCTGGTTGATGTGAATACT    |
|                                                   | gCesA8A/B-3-off-4-R | GCTACTAAGCTTCAACTATACA    |
| <b>Primers used to identify transgenic plants</b> |                     |                           |
| <b><i>zCas</i></b>                                | zCas-F              | TGAGAACATCGTCATTGAGATGG   |
|                                                   | zCas-R              | TCAGCTTGTCATTCTCATCGTAC   |
| <b><i>Hyg</i></b>                                 | Hyg-F               | GAGCTTGTGCGATCGACAGAT     |
|                                                   | Hyg-R               | CATATGCGCGATTGCTGATC      |
| <b><i>PtrActin2</i></b>                           | Actin2-F            | AACATGGGATTGTTAGCAACTGG   |
|                                                   | Actin2-R            | TCCATCACCAGAATCCAGCACA    |
| <b>Primers used for RT-PCR</b>                    |                     |                           |
| <b>PtrCesA4</b>                                   | PtrCesA4-F          | GACGATGCCGAGTTTGGAGAGC    |
|                                                   | PtrCesA4-R          | CAACTGTGCAAAAGTGGGATAACCT |

|                  |              |                                |
|------------------|--------------|--------------------------------|
| <b>PtrCesA7A</b> | PtrCesA7A-F  | GGAATTCAGGGTCCGGTGTACG         |
|                  | PtrCesA7A-R  | AATAGACCTCCATCCACGGCAA         |
| <b>PtrCesA7B</b> | PtrCesA7B -F | AAGGCAAGCTTTGTATGGCTATGAC      |
|                  | PtrCesA7B -R | AATAGACCTCCAGCCACGACAA         |
| <b>PtrCesA8A</b> | PtrCesA8A -F | TTGTTGGTGTGTTGCGGGATT          |
|                  | PtrCesA8A -R | CATCTCGCAGTTCATGTA ACTCAACTACT |
| <b>PtrCesA8B</b> | PtrCesA8B-F  | CTGGCATCGATACGAACTTCAC         |
|                  | PtrCesA8B-R  | TCTTGAGAGAACTACAACGAGGA        |

**Table S2** The Cas9/gRNA-induced target site mutations in single *PtrCHL11* gene of *Populus trichocarpa*.

| Gene: Potri.004G053400 ( <i>PtrCHL11</i> )                                           |                                                                                                               |                                                                                 |              |                                                                                                         |                                                                                 |              |
|--------------------------------------------------------------------------------------|---------------------------------------------------------------------------------------------------------------|---------------------------------------------------------------------------------|--------------|---------------------------------------------------------------------------------------------------------|---------------------------------------------------------------------------------|--------------|
| Vector: Cas9/gRNA-CHL11                                                              |                                                                                                               |                                                                                 |              |                                                                                                         |                                                                                 |              |
| gRNA: gCHL11-a (TTTACTTCCAGAAATTAAGGTGG); gCHL11-b (CCGAAAAGTCCACCACTGTTAGG)         |                                                                                                               |                                                                                 |              |                                                                                                         |                                                                                 |              |
| Target sequences: CHL11-a, TTTACTTCCAGAAATTAAGGTGG; CHL11-b, CCGAAAAGTCCACCACTGTTAGG |                                                                                                               |                                                                                 |              |                                                                                                         |                                                                                 |              |
| Line (#)                                                                             | CHL11-a<br>TTTACTTCCAGAAATTAAGGTGG                                                                            | Mutation types<br>(Number of plasmids<br>containing the cloned PCR<br>products) |              | CHL11-b<br>CCGAAAAGTCCACCACTGTTAGG                                                                      | Mutation types<br>(Number of plasmids<br>containing the cloned<br>PCR products) |              |
| <i>ptrchl1-1#</i>                                                                    | ... ----- AAGGTGGTTGCT                                                                                        | -44 (×25)                                                                       | homozygous   | AGGGACCGGAA ----- ...                                                                                   | -44 (×25)                                                                       | homozygous   |
| <i>ptrchl1-2#</i>                                                                    | GTTGATTTACTTCCAGAAATT - AGGTGGTTGCT<br>GTTGATTTACTTCCAGAAATTAAGGTGGTTGCT                                      | -1 (×16)<br>0 (×9)                                                              | heterozygous | AGGGACC ----- CACCACTGTTAGGTCCAT<br>AGGGACCGGAAAAGTCCACCACTGTTAGGTCCAT                                  | -8 (×16)<br>0 (×9)                                                              | heterozygous |
| <i>ptrchl1-3#</i>                                                                    | GTTGATTTACTTCCAGAAATTAAGGTGGTTGCT<br>... ----- AGGTGGTTGCT<br>... ----- AAGGTGGTTGCT<br>... ----- AGGTGGTTGCT | 0 (×13)<br>-55 (×7)<br>-44 (×2)<br>-42 (×3)                                     | chimeric     | AGGGACCGGAA a AGTCCACCACTGTTAGGTCCAT<br>A ----- ...<br>AGGGACCGGAA ----- ...<br>AGGGACCGGAAAT ----- ... | +1 (×13)<br>-55 (×7)<br>-44 (×2)<br>-42 (×3)                                    | chimeric     |
| <i>ptrchl1-4#</i>                                                                    | ... ----- TGACCCCTATAACTCAG<br>... ----- AGGTGGTTGCT                                                          | -66 (×11)<br>-22 (×14)                                                          | biallelic    | AGG- ----- ...<br>AGGGACCGGAA - GTCCACCACTGTTAGGTCCAT                                                   | -66 (×11)<br>-1 (×14)                                                           | biallelic    |
| <i>ptrchl1-5#</i>                                                                    | ... ----- GGTGACCCCTATA<br>... ----- GGTGACCCCTATA                                                            | -57 (×17)<br>-31 (×8)                                                           | biallelic    | AGGGACCGGA ----- ...<br>AGGGACCGGAA a AGTCCACCACTGTTAGGTCCAT                                            | -57 (×17)<br>+1 (×8)                                                            | biallelic    |
| <i>ptrchl1-6#</i>                                                                    | ... ----- AAGGTGGTTGCT<br>GTTGATTTACTTCCAGAAATTAAGGTGGTTGCT                                                   | -44 (×10)<br>0 (×15)                                                            | heterozygous | AGGGACCGGAA ----- ...<br>AGGGACCGGAAAAGTCCACCACTGTTAGGTCCAT                                             | -44 (×10)<br>0 (×15)                                                            | heterozygous |
| <i>ptrchl1-7#</i>                                                                    | GTTGATTTACTTCCAGAAATT - AGGTGGTTGCT<br>... ----- AAGGTGGTTGCT                                                 | -1 (×14)<br>-44 (×11)                                                           | biallelic    | AGGGACCGGAA - GTCCACCACTGTTAGGTCCAT<br>AGGGACCGGAA ----- ...                                            | -1 (×14)<br>-44 (×11)                                                           | biallelic    |
| <i>ptrchl1-8#</i>                                                                    | ... ----- AAGGTGGTTGCT<br>GTTGATTTACTTCCAGAAATTAAGGTGGTTGCT                                                   | -44 (×16)<br>0 (×9)                                                             | heterozygous | AGGGACCGGAA ----- ...<br>AGGGACCGGAAAAGTCCACCACTGTTAGGTCCAT                                             | -44 (×16)<br>0 (×9)                                                             | heterozygous |
| <i>ptrchl1-9#</i>                                                                    | ... ----- AAGGTGGTTGCT<br>GTTGATTTACTTCCAGAAATTAAGGTGGTTGCT                                                   | -44 (×10)<br>0 (×15)                                                            | heterozygous | AGGGACCGGAA ----- ...<br>AGGGACCGGAAAAGTCCACCACTGTTAGGTCCAT                                             | -44 (×10)<br>0 (×15)                                                            | heterozygous |
| <i>ptrchl1-10#</i>                                                                   | GTTGATTTACTTCCAGAAATT - AGGTGGTTGCT                                                                           | -1 (×25)                                                                        | homozygous   | AGGGACCGGAA - GTCCACCACTGTTAGGTCCAT<br>AGGGACCGG ----- AGGTCCAT                                         | -1 (×13)<br>-16 (×12)                                                           | biallelic    |
| <i>ptrchl1-11#</i>                                                                   | ... ----- AGGTGGTTGCT<br>... ----- GATCCAGAGTCGA                                                              | -45 (×8)<br>-83 (×17)                                                           | biallelic    | AGGGACCGGAA ----- ...<br>AGGGACCGGAA ----- ...                                                          | -45 (×8)<br>-83 (×17)                                                           | biallelic    |
| <i>ptrchl1-12#</i>                                                                   | ... ----- AGGTGGTTGCT<br>GTTGATTTAT ----- AGGTGGTTGCT                                                         | -45 (×15)<br>-12 (×10)                                                          | biallelic    | AGGGACCGGAA ----- ...<br>AGGGACCGGAA - GTCCACCACTGTTAGGTCCAT                                            | -45 (×15)<br>-1 (×10)                                                           | biallelic    |
| <i>ptrchl1-13#</i>                                                                   | ... ----- AGGTGGTTGCT<br>... ----- AAGGTGGTTGCT                                                               | -45 (×3)<br>-44 (×12)                                                           | chimeric     | AGGGACCGGAA ----- ...<br>AGGGACCGGAA ----- ...                                                          | -45 (×3)<br>-44 (×12)                                                           | chimeric     |

|                    |                                                                                                |                        |              |                                                                                               |                       |              |
|--------------------|------------------------------------------------------------------------------------------------|------------------------|--------------|-----------------------------------------------------------------------------------------------|-----------------------|--------------|
|                    | ... -----AGG <u>TGG</u> TTGCT<br>GTTGATTACTTCCAGAAATTAAGG <u>TGG</u> TTGCT                     | -42 (×6)<br>0 (×4)     |              | AGGG <u>ACCG</u> GAAATT ----- ...<br>AGGG <u>ACCG</u> GAAAGTCCACCACTGTTAGGTCCAT               | -42 (×6)<br>0 (×4)    |              |
| <i>ptrchl1-14#</i> | ... ----- GATCCAGAGTCGA                                                                        | -83 (×25)              | homozygous   | AGGG <u>ACCG</u> GAA ----- ...                                                                | -83 (×25)             | homozygous   |
| <i>ptrchl1-15#</i> | ... ----- AGG <u>TGG</u> TTGCT                                                                 | -45 (×25)              | homozygous   | AGGG <u>ACCG</u> GAA ----- ...                                                                | -45 (×25)             | homozygous   |
| <i>ptrchl1-16#</i> | GTTGATTACTTCCAGAAATTA a<br>AGG <u>TGG</u> TTGCT<br>GTTGATTACTTCCAGAAATT - AGG <u>TGG</u> TTGCT | +1 (×13)<br>-1 (×12)   | biallelic    | AGGG <u>ACCG</u> GAA - GTCCACCACTGTTAGGTCCAT<br>AGGG <u>ACCG</u> GAA a AGTCCACCACTGTTAGGTCCAT | -1 (×13)<br>+1 (×12)  | biallelic    |
| <i>ptrchl1-17#</i> | ... -----<br>CCTATAACTCAGATGA<br>GTTGATTACTTCCAGAAATTAAGG <u>TGG</u> TTGCT                     | -67 (×15)<br>0 (×10)   | heterozygous | AGGG <u>ACC</u> ----- ...<br>AGGG <u>ACCG</u> GAAAGTCCACCACTGTTAGGTCCAT                       | -67 (×15)<br>0 (×10)  | heterozygous |
| <i>ptrchl1-18#</i> | ... -----TGACCCCTATAACTCAG<br>----- AGG <u>TGG</u> TTGCT                                       | -66 (×12)<br>-22 (×13) | biallelic    | AGG----- ...<br>AGGG <u>ACCG</u> GAA - GTCCACCACTGTTAGGTCCAT                                  | -66 (×12)<br>-1 (×13) | biallelic    |

**Table S3** The Cas9/gRNA-targeted mutations in both *PtrCHL11* and 2 genes of *Populus trichocarpa*.

| Gene: Potri.004G053400 ( <i>PtrCHL11</i> ) / Potri.011G063400 ( <i>PtrCHL12</i> )    |                                                                                                                          |                                                                                 |              |                                                                               |                                                                                 |              |
|--------------------------------------------------------------------------------------|--------------------------------------------------------------------------------------------------------------------------|---------------------------------------------------------------------------------|--------------|-------------------------------------------------------------------------------|---------------------------------------------------------------------------------|--------------|
| Vector: Cas9/gRNA-CHL11/2-1                                                          |                                                                                                                          |                                                                                 |              |                                                                               |                                                                                 |              |
| gRNA: gCHL11/2-a (CTTCTTGCTAAAGCTAATAGAGG); gCHL11/2-b (CCCAAGATTGGAGGTGTCATGAT)     |                                                                                                                          |                                                                                 |              |                                                                               |                                                                                 |              |
| Target sequences: CHL11-a, CTTCTTGCTAAAGCTAATAGAGG; CHL11-b, CCCAAGATTGGAGGTGTCATGAT |                                                                                                                          |                                                                                 |              |                                                                               |                                                                                 |              |
| CHL12-a, CTTCTTGCTAAAGCTAATAGAGG; CHL12-b, CCCAAGATTGGAGGTGTCATGAT                   |                                                                                                                          |                                                                                 |              |                                                                               |                                                                                 |              |
| Line (#)                                                                             | CHL11/2-a<br>CHL11, CTTCTTGCTAAAGCTAATAGAGG<br>CHL12, CTTCTTGCTAAAGCTAATAGAGG                                            | Mutation types<br>(Number of plasmids<br>containing the cloned<br>PCR products) |              | CHL11/2-b<br>CHL11, CCCAAGATTGGAGGTGTCATGAT<br>CHL12, CCCAAGATTGGAGGTGTCATGAT | Mutation types<br>(Number of plasmids<br>containing the cloned<br>PCR products) |              |
| <i>ptrchli1/2-1#-CHL11-CHL12</i>                                                     | ... TAGAGGCATTC                                                                                                          | -319 (×25)                                                                      | homozygous   | TTGATCCCAAGA ...                                                              | -319 (×25)                                                                      | homozygous   |
|                                                                                      | CGGGTCTTCTTGCTAAAGC --- TAGAGGGATTC<br>CGGGTCTTCTTGCTAAAGCTA - TAGAGGGATTC                                               | -3 (×16)<br>-1 (×9)                                                             | biallelic    | TTGATCCC ----- GAGGTGTCATGATCATGG<br>TTGATCCCAAG - TTGGAGGTGTCATGATCATGG      | -7 (×16)<br>-1 (×9)                                                             | biallelic    |
| <i>ptrchli1/2-2#-CHL11-CHL12</i>                                                     | CGGGTCTTCTTGCTAAAGC --- TAGAGGCATTC                                                                                      | -3 (×25)                                                                        | homozygous   | TTGATCCC ----- GAGGTGTCATGATCATGG<br>TTGAT ----- GTCATGATCATGG                | -7 (×13)<br>-15 (×12)                                                           | biallelic    |
|                                                                                      | TTGTGGGACAATT ----- TCGTCATTCTTAC<br>CGGGTCTTCTTGCTAAAGC --- TAGAGGGATTC                                                 | -356 (×19)<br>-9 (×6)                                                           | biallelic    | TTGATCCCAAG a ATTGGAGGTGTCATGATCATGG<br>TTGATCCCAAG ---- GAGGTGTCATGATCATGG   | +1 (×19)<br>-4 (×6)                                                             | biallelic    |
| <i>ptrchli1/2-3#-CHL11-CHL12</i>                                                     | ... TAGAGGCATTC                                                                                                          | -319 (×25)                                                                      | homozygous   | TTGATCCCAAGA -----                                                            | -319 (×25)                                                                      | homozygous   |
|                                                                                      | ... TAGAGGCATTC                                                                                                          | -321 (×25)                                                                      | homozygous   | TTGATCCCAA -----                                                              | -321 (×25)                                                                      | homozygous   |
| <i>ptrchli1/2-4#-CHL11-CHL12</i>                                                     | ... TAGAGGCATTC                                                                                                          | -319 (×25)                                                                      | homozygous   | TTGATCCCAAGA -----                                                            | -319 (×25)                                                                      | homozygous   |
|                                                                                      | CGGGTCTTCTTGCTAAAGC --- TAGAGGGATTC<br>CGGGTCTTCTTGCTAAAGCTA - TAGAGGGATTC                                               | -3 (×14)<br>-1 (×7)                                                             | chimeric     | TTGATCCC ----- GAGGTGTCATGATCATGG<br>TTGATCCCAAG - TTGGAGGTGTCATGATCATGG      | -7 (×14)<br>-1 (×7)                                                             | chimeric     |
|                                                                                      | CGGGTCTTCTTGCTAAAGCTAATAGAGGGATTC                                                                                        | 0 (×4)                                                                          |              | TTGATCCCAAGATTGGAGGTGTCATGATCATGG                                             | 0 (×4)                                                                          |              |
| <i>ptrchli1/2-5#-CHL11-CHL12</i>                                                     | ... TAGAGGCATTC<br>GCTCTACCGAGG ----- TTAATCTTTTGA<br>CGGGTCTTCTTGCTAAAGCTAATAGAGGGATTC                                  | -319 (×7)<br>-66 (×5)<br>0 (×13)                                                | chimeric     | TTGATCCCAAGA -----<br>TTGATCCCAAGATTGGAGGTGTCATGATCATGG                       | -319 (×7)<br>0 (×18)                                                            | heterozygous |
|                                                                                      | ... TAGAGGCATTC<br>CGGGTCTTCTTGCTAAAGCTAA a TAGAGGGATTC                                                                  | -319 (×18)<br>+1 (×7)                                                           | biallelic    | TTGATCCCAAGA -----<br>TTGATCCCAAGA --- GAGGTGTCATGATCATGG                     | -319 (×18)<br>-3 (×7)                                                           | biallelic    |
| <i>ptrchli1/2-6#-CHL11-CHL12</i>                                                     | ... TAGAGGCATTC                                                                                                          | -319 (×17)                                                                      | biallelic    | TTGATCCCAAGA -----                                                            | -319 (×17)                                                                      | biallelic    |
|                                                                                      | CGGGTCT ----- TAGAGGCATTC                                                                                                | -15 (×8)                                                                        |              | TTGATCCCAAG - TTGGAGGTGTCATGATCATGG                                           | -1 (×8)                                                                         |              |
|                                                                                      | CGGGTCTTCTTGCTAAAGCTAA a TAGAGGGATTC<br>TGGTGACCCCTATAA ... ^43 ATTC<br>(^43:aagatcaacataaagattaacttcatcaactctcaccgaggg) | +1 (×15)<br>-217+43<br>(×10)                                                    | biallelic    | TTGATCCCAAG - TTGGAGGTGTCATGATCATGG                                           | -1 (×25)                                                                        | homozygous   |
| <i>ptrchli1/2-7#-CHL11-CHL12</i>                                                     | ... TAGAGGCATTC                                                                                                          | -319 (×16)                                                                      | biallelic    | TTGATCCCAAGA -----                                                            | -319 (×16)                                                                      | biallelic    |
|                                                                                      | CGGGTCT ----- TAGAGGCATTC                                                                                                | -15 (×9)                                                                        |              | TTGATCCCAAG - TTGGAGGTGTCATGATCATGG                                           | -1 (×9)                                                                         |              |
|                                                                                      | CGGGTCTTCTTGCTAAAGCTAA a TAGAGGGATTC                                                                                     | +1 (×16)                                                                        | heterozygous | TTGATCCCAAG - TTGGAGGTGTCATGATCATGG                                           | -1 (×19)                                                                        | biallelic    |

|                                                                                                                                                                                                                                                                                                    | CGGGTCTTCTTGCTAAAGCTAATAGAGGGATTC                                             | 0 (×9)                                                                          |              | TTGATCC - - - - - TTGGAGGTGTCATGATCATGG                                        | -5 (×6)                                                                         |              |
|----------------------------------------------------------------------------------------------------------------------------------------------------------------------------------------------------------------------------------------------------------------------------------------------------|-------------------------------------------------------------------------------|---------------------------------------------------------------------------------|--------------|--------------------------------------------------------------------------------|---------------------------------------------------------------------------------|--------------|
| <i>ptrchli1/2-8#-CHLI1</i><br><i>-CHLI2</i>                                                                                                                                                                                                                                                        | ... - - - - - TAGAGGCATTC                                                     | -319 (×25)                                                                      | homozygous   | TTGATCCCAAGA - - - - - ...                                                     | -319 (×25)                                                                      | homozygous   |
|                                                                                                                                                                                                                                                                                                    | CGGGTCTTCTTGCTAAAGCTAA a TAGAGGGATTC<br>CGGGTCTTCTTGCTAAAGCTAATAGAGGGATTC     | +1 (×5)<br>0 (×20)                                                              | heterozygous | TTGATCC - - - - - TTGGAGGTGTCATGATCATGG                                        | -5 (×25)                                                                        | homozygous   |
| <i>ptrchli1/2-9#-CHLI1</i><br><i>-CHLI2</i>                                                                                                                                                                                                                                                        | ... - - - - - TAGAGGCATTC                                                     | -319 (×25)                                                                      | homozygous   | TTGATCCCAAGA - - - - - ...                                                     | -319 (×25)                                                                      | homozygous   |
|                                                                                                                                                                                                                                                                                                    | CGGGTCTTCTTGCTAAAGCTAA a TAGAGGGATTC<br>CGGGTCTTCTTGCTAAAGC - - ATAGAGGGATTC  | +1 (×13)<br>-2 (×12)                                                            | biallelic    | TTGATCCCAAG - TTGGAGGTGTCATGATCATGG                                            | -1 (×25)                                                                        | homozygous   |
| <i>ptrchli1/2-10#-CHLI1</i><br><i>-CHLI2</i>                                                                                                                                                                                                                                                       | ... - - - - - TAGAGGCATTC                                                     | -319 (×25)                                                                      | homozygous   | TTGATCCCAAGA - - - - - ...                                                     | -319 (×25)                                                                      | homozygous   |
|                                                                                                                                                                                                                                                                                                    | CGGGTCTTCTTGCTAAAGCTAA a TAGAGGGATTC                                          | +1 (×14)                                                                        | chimeric     | TTGATCCCAAG - TTGGAGGTGTCATGATCATGG                                            | -1 (×25)                                                                        | homozygous   |
|                                                                                                                                                                                                                                                                                                    | CGGGTCTTCTTGCTAAAGCTA - TAGAGGGATTC<br>CGGGTCTTCTTGCTAAAGCTAATAGAGGGATTC      | -1 (×5)<br>0 (×6)                                                               |              |                                                                                |                                                                                 |              |
| <i>ptrchli1/2-11#-CHLI1</i><br><i>-CHLI2</i>                                                                                                                                                                                                                                                       | ... - - - - - TAGAGGCATTC                                                     | -319 (×9)                                                                       | biallelic    | TTGATCCCAAGA - - - - - ...                                                     | -319 (×9)                                                                       | biallelic    |
|                                                                                                                                                                                                                                                                                                    | CGGGTCT - - - - - TAGAGGCATTC                                                 | -15 (×16)                                                                       |              | TTGATCCCAAG - TTGGAGGTGTCATGATCATGG                                            | -1 (×16)                                                                        |              |
|                                                                                                                                                                                                                                                                                                    | CGGGTCTTCTTGCTAAAGCTAA a TAGAGGGATTC                                          | +1 (×25)                                                                        | homozygous   | TTGATCCCAAG - TTGGAGGTGTCATGATCATGG                                            | -1 (×25)                                                                        | homozygous   |
| <i>ptrchli1/2-12#-CHLI1</i><br><i>-CHLI2</i>                                                                                                                                                                                                                                                       | ... - - - - - TAGAGGCATTC                                                     | -319 (×25)                                                                      | homozygous   | TTGATCCCAAGA - - - - - ...                                                     | -319 (×25)                                                                      | homozygous   |
|                                                                                                                                                                                                                                                                                                    | CGGGTCTTCTTGCTAAAGCTAA a TAGAGGGATTC                                          | +1 (×14)                                                                        | biallelic    | TTGATCCCAAG - TTGGAGGTGTCATGATCATGG                                            | -1 (×14)                                                                        | biallelic    |
|                                                                                                                                                                                                                                                                                                    | CGGGTCTTCTTGCTAAAGCTA - TAGAGGGATTC                                           | -1 (×11)                                                                        |              | TTGATCCCAAG a ATTGGAGGTGTCATGATCATGG                                           | +1 (×11)                                                                        |              |
| <b>Vector:</b> Cas9/gRNA-CHLI1/2-2<br><b>gRNA:</b> gCHLI1/2-c (GTCGATGGGTATTGAAGTCAGGG); gCHLI1/2-d (CCATTTGCTGCTATAGTAGGGCA)<br><b>Target sequences:</b> CHLI1-c, GTCGATGGGTATTGAAGTCAGGG; CHLI1-d, CCATTTGCTGCTATAGTAGGGCA<br>CHLI2-c, GTCCATGGGTATTGCAGTCAGGG; CHLI2-d, CCATTTGCTGCAATAGTAGGGCA |                                                                               |                                                                                 |              |                                                                                |                                                                                 |              |
| Line (#)                                                                                                                                                                                                                                                                                           | CHLI1/2-c<br>CHLI1, GTCGATGGGTATTGAAGTCAGGG<br>CHLI2, GTCCATGGGTATTGAAGTCAGGG | Mutation types<br>(Number of plasmids<br>containing the cloned<br>PCR products) |              | gCHLI1/2-d<br>CHLI1, CCATTTGCTGCTATAGTAGGGCA<br>CHLI2, CCATTTGCTGCAATAGTAGGGCA | Mutation types<br>(Number of plasmids<br>containing the cloned<br>PCR products) |              |
| <i>ptrchli1/2-13#-CHLI1</i><br><i>-CHLI2</i>                                                                                                                                                                                                                                                       | CCAGAGTCGATGGGTATTGAA - TCAGGGAGAGT                                           | -1 (×25)                                                                        | homozygous   | TATATCCATTTGCTGCTATAGTAGGGCAAGATG<br>TATATCCATT - GCTGCTATAGTAGGGCAAGATG       | 0 (×22)<br>-1 (×3)                                                              | heterozygous |
|                                                                                                                                                                                                                                                                                                    | CCAGAGTCCATGGGTATTGA - - - CAGGGAGAGT<br>CCAGAGTCCATGGGTATTGA - - - - - AGAGT | -3 (×15)<br>-8 (×10)                                                            | biallelic    | TGTATCCATTTGCTGCAATAGTAGGGCAAGATG                                              | 0 (×25)                                                                         | WT           |
| <i>ptrchli1/2-14#-CHLI1</i><br><i>-CHLI2</i>                                                                                                                                                                                                                                                       | CCAGAGTCGATGGGTATTGAA - TCAGGGAGAGT<br>... - - - - - AAGTCAGGGAGAGT           | -1 (×13)<br>-159 (×12)                                                          | biallelic    | TATATCCATTTGCTGCTATAGTAGGGCAAGATG                                              | 0 (×25)                                                                         | WT           |
|                                                                                                                                                                                                                                                                                                    | CCAGAGTCCATGGGTATTGAAGTCAGGGAGAGT                                             | 0 (×25)                                                                         | WT           | TGTATCCATTTGCTGCAATAGTAGGGCAAGATG                                              | 0 (×25)                                                                         | WT           |
| <i>ptrchli1/2-15#-CHLI1</i><br><i>-CHLI2</i>                                                                                                                                                                                                                                                       | CCAGAGTCGATGGGTATTGAA - TCAGGGAGAGT<br>... - - - - - AAGTCAGGGAGAGT           | -1 (×9)<br>-159 (×16)                                                           | biallelic    | TATATCCATTTGCTGCTATAGTAGGGCAAGATG                                              | 0 (×25)                                                                         | WT           |
|                                                                                                                                                                                                                                                                                                    | - - - - - CCATGGGTATTGAAGTCAGGGAGAGT<br>CCAGAGTCCATGGGTATTGAAGTCAGGGAGAGT     | -7 (×14)<br>0 (×11)                                                             | heterozygous | TGTATCCATTTGCTGCAATAGTAGGGCAAGATG                                              | 0 (×25)                                                                         | WT           |
|                                                                                                                                                                                                                                                                                                    | CCAGAGTCGATGGGTATTGAA - TCAGGGAGAGT<br>CCAGAGTCGATGGGTATTGAAGTCAGGGAGAGT      | -1 (×21)<br>0 (×4)                                                              | heterozygous | TATATCCATTT - - TGCTATAGTAGGGCAAGATG<br>TATATCCATTTGCTGCTATAGTAGGGCAAGATG      | -2 (×13)<br>0 (×12)                                                             | heterozygous |



|                                                    |                                                                                                             |                                 |              |                                                                                 |                       |            |
|----------------------------------------------------|-------------------------------------------------------------------------------------------------------------|---------------------------------|--------------|---------------------------------------------------------------------------------|-----------------------|------------|
| <b>-CHLI2</b>                                      | CCAGAGTCC ----- TCTGTCAGGGAGAGT<br>CCAGAGTCCATGGGTATTGAAGTCAGGGAGAGT                                        | -9 (×14)<br>0 (×11)             | heterozygous | TGTAT <u>CCA</u> TTTGCTGCAATAGTAGGGCAAGATG                                      | 0 (×25)               | WT         |
| <b><i>ptrchli1/2-17#</i><br/>-CHLI1<br/>-CHLI2</b> | CCAGAGTTCGATGGGTATTGA -- TCAGGGAGAGT<br>... ----- TCAGGGAGAGT                                               | -2 (×9)<br>-210 (×16)           | biallelic    | TATAT <u>CCA</u> TT - GCTGCTATAGTAGGGCAAGATG<br>TATAT <u>CCA</u> TTTG ----- ... | -1 (×9)<br>-210 (×16) | biallelic  |
|                                                    | CCAGAGTCCATGGGTATT ---- TCAGGGAGAGT<br>CCAGAGTCCATGGGTATTGAA - TCAGGGAGAGT<br>CCAGAGTCCATGGGTATTGA ----- GT | -4 (×18)<br>-1 (×5)<br>-11 (×2) | chimeric     | TGTAT <u>CCA</u> TTTGCTGCAATAGTAGGGCAAGATG                                      | 0 (×25)               | WT         |
| <b><i>ptrchli1/2-18#</i><br/>-CHLI1<br/>-CHLI2</b> | ... ----- TCAGGGAGAGT                                                                                       | -211 (×25)                      | homozygous   | TATAT <u>CCA</u> TTT ----- ...                                                  | -211 (×25)            | homozygous |
|                                                    | CCAGAGTCCATGGGTATTGA -- TCAGGGAGAGT<br>----- TCAGGGAGAGT                                                    | -2 (×13)<br>-24 (×12)           | biallelic    | TGTAT <u>CCA</u> TTTGCTGCAATAGTAGGGCAAGATG                                      | 0 (×25)               | WT         |
| <b><i>ptrchli1/2-19#</i><br/>-CHLI1<br/>-CHLI2</b> | ... ----- TCAGGGAGAGT                                                                                       | -210 (×10)                      | biallelic    | TATAT <u>CCA</u> TTTG ----- ...                                                 | -210 (×10)            | biallelic  |
|                                                    | CCAGAGTTCGATGGGTATTGA -- TCAGGGAGAGT                                                                        | -2 (×15)                        |              | TATAT <u>CCA</u> TT - GCTGCTATAGTAGGGCAAGATG                                    | -1 (×15)              |            |
|                                                    | CCAGAGTCCATGGGTATT ---- TCAGGGAGAGT<br>CCAGAGTCCATGGGTATTGA ----- GT                                        | -4 (×9)<br>-11 (×16)            | biallelic    | TGTAT <u>CCA</u> TTTGCTGCAATAGTAGGGCAAGATG                                      | 0 (×25)               | WT         |
| <b><i>ptrchli1/2-20#</i><br/>-CHLI1<br/>-CHLI2</b> | ... ----- TCAGGGAGAGT                                                                                       | -210 (×11)                      | biallelic    | TATAT <u>CCA</u> TTTG ----- ...                                                 | -210 (×11)            | biallelic  |
|                                                    | CCAGAGTTCGATGGGTATTGA -- TCAGGGAGAGT                                                                        | -2 (×14)                        |              | TATAT <u>CCA</u> TTT t GCTGCTATAGTAGGGCAAGATG                                   | +1 (×14)              |            |
|                                                    | CCAGAGTCCATGGGTATTGA -- TCAGGGAGAGT<br>CCAGAGTCCATGGGTATTGAA - TCAGGGAGAGT                                  | -2 (×9)<br>-1 (×16)             | biallelic    | TGTAT <u>CCA</u> TTTGCTGCAATAGTAGGGCAAGATG                                      | 0 (×25)               | WT         |

**Table S4** Analysis of potential off-target sites among the Cas9/gRNA-induced *ptrchlI* mutants.

| On/Off targets | Sequence name   | Bases position of gRNAs |   |   |   |   |   |   |   |   |    |    |    |    |    |    |    |    |    |    | PAM |    |    | Target gene or genomic position | Off-target Editing (Y/N) |    |
|----------------|-----------------|-------------------------|---|---|---|---|---|---|---|---|----|----|----|----|----|----|----|----|----|----|-----|----|----|---------------------------------|--------------------------|----|
|                |                 | 1                       | 2 | 3 | 4 | 5 | 6 | 7 | 8 | 9 | 10 | 11 | 12 | 13 | 14 | 15 | 16 | 17 | 18 | 19 | 20  | 21 | 22 |                                 |                          | 23 |
| On             | <b>gCHLI1-a</b> | T                       | T | T | A | C | T | T | C | C | A  | G  | A  | A  | A  | T  | T  | A  | A  | G  | G   | T  | G  | G                               | CHLI1                    | -  |
| Off            | gCHLI1a-off-1   | T                       | T | T | A | C | T | T | C | C | T  | G  | A  | A  | A  | T  | T  | A  | A  | G  | G   | T  | A  | G                               | CHLI2                    | No |
|                | gCHLI1a-off-2   | T                       | T | T | A | C | T | T | G | C | A  | T  | A  | A  | A  | T  | T  | A  | A  | G  | G   | T  | G  | G                               | Chr09 (+4335300)         | No |
|                | gCHLI1a-off-3   | C                       | T | T | A | C | C | A | C | C | A  | G  | A  | A  | A  | T  | T  | A  | A  | A  | G   | T  | G  | G                               | Chr13 (-9790031)         | No |
|                | gCHLI1a-off-4   | G                       | T | C | A | C | T | T | T | C | A  | G  | A  | A  | A  | T  | T  | A  | A  | G  | G   | A  | G  | G                               | Potri.006G228600         | No |
|                | gCHLI1a-off-5   | A                       | C | T | C | C | C | T | C | C | A  | G  | A  | A  | A  | T  | T  | A  | T  | G  | G   | T  | G  | G                               | Chr12 (-2022439)         | No |
| On             | <b>gCHLI1-b</b> | C                       | C | T | A | A | C | A | G | T | G  | G  | T  | G  | G  | A  | C  | T  | T  | T  | C   | C  | G  | G                               | CHLI1                    | -  |
| Off            | gCHLI1b-off-1   | C                       | C | T | A | A | C | A | G | T | C  | G  | T  | G  | G  | A  | C  | T  | T  | C  | C   | C  | C  | G                               | CHLI2                    | No |
|                | gCHLI1b-off-2   | A                       | T | T | A | G | A | A | T | T | G  | G  | T  | G  | G  | A  | C  | T  | T  | T  | C   | C  | G  | G                               | Potri.018G015300         | No |
|                | gCHLI1b-off-3   | G                       | T | A | A | A | C | C | G | T | G  | G  | T  | G  | G  | A  | C  | T  | T  | T  | C   | T  | G  | A                               | Potri.013G004900         | No |

Nucleotides in green shading are the same with the designed gRNAs target sites and mismatched nucleotides are without shading. The PAM regions are highlighted in red shading. Potential off-target sites in protein coding gene regions are annotated with gene ID and the others located in noncoding regions are detailed with position information on chromosomes.

**Number of plasmids containing the cloned PCR products**

**gCHLI1a-off-1**

WT TTTACTTCCTGAAATTAAGGTAG (×10)  
*ptrchlI*-1# TTTACTTCCTGAAATTAAGGTAG (×15)  
*ptrchlI*-4# TTTACTTCCTGAAATTAAGGTAG (×15)  
*ptrchlI*-5# TTTACTTCCTGAAATTAAGGTAG (×15)  
*ptrchlI*-11# TTTACTTCCTGAAATTAAGGTAG (×15)  
*ptrchlI*-14# TTTACTTCCTGAAATTAAGGTAG (×15)  
*ptrchlI*-15# TTTACTTCCTGAAATTAAGGTAG (×15)

**gCHLI1a-off-2**

WT TTTACTTGCATAAATTAAGGTGG (×10)  
*ptrchlI*-1# TTTACTTGCATAAATTAAGGTGG (×15)  
*ptrchlI*-8# TTTACTTGCATAAATTAAGGTGG (×15)  
*ptrchlI*-11# TTTACTTGCATAAATTAAGGTGG (×15)  
*ptrchlI*-12# TTTACTTGCATAAATTAAGGTGG (×15)  
*ptrchlI*-15# TTTACTTGCATAAATTAAGGTGG (×15)  
*ptrchlI*-16# TTTACTTGCATAAATTAAGGTGG (×15)

**gCHLI1a-off-3**

WT CTTACCACCAGAAATTAAGTGG (×10)  
*ptrchli1-1#* CTTACCACCAGAAATTAAGTGG (×15)  
*ptrchli1-2#* CTTACCACCAGAAATTAAGTGG (×15)  
*ptrchli1-7#* CTTACCACCAGAAATTAAGTGG (×15)  
*ptrchli1-10#* CTTACCACCAGAAATTAAGTGG (×15)  
*ptrchli1-16#* CTTACCACCAGAAATTAAGTGG (×15)  
*ptrchli1-18#* CTTACCACCAGAAATTAAGTGG (×15)

**gCHLI1a-off-4**

WT GTCACTTTCAGAAATTAAGGAGG (×10)  
*ptrchli1-3#* GTCACTTTCAGAAATTAAGGAGG (×15)  
*ptrchli1-4#* GTCACTTTCAGAAATTAAGGAGG (×15)  
*ptrchli1-5#* GTCACTTTCAGAAATTAAGGAGG (×15)  
*ptrchli1-7#* GTCACTTTCAGAAATTAAGGAGG (×15)  
*ptrchli1-9#* GTCACTTTCAGAAATTAAGGAGG (×15)  
*ptrchli1-10#* GTCACTTTCAGAAATTAAGGAGG (×15)

**gCHLI1a-off-5**

WT ACTCCCTCCAGAAATTATGGTGG (×10)  
*ptrchli1-3#* ACTCCCTCCAGAAATTATGGTGG (×15)  
*ptrchli1-4#* ACTCCCTCCAGAAATTATGGTGG (×15)  
*ptrchli1-5#* ACTCCCTCCAGAAATTATGGTGG (×15)  
*ptrchli1-11#* ACTCCCTCCAGAAATTATGGTGG (×15)  
*ptrchli1-12#* ACTCCCTCCAGAAATTATGGTGG (×15)  
*ptrchli1-14#* ACTCCCTCCAGAAATTATGGTGG (×15)

**gCHLI1b-off-1**

WT CGGGGAAGTCCACGACTGTTAGG (×10)  
*ptrchli1-1#* CGGGGAAGTCCACGACTGTTAGG (×15)  
*ptrchli1-4#* CGGGGAAGTCCACGACTGTTAGG (×15)  
*ptrchli1-5#* CGGGGAAGTCCACGACTGTTAGG (×15)  
*ptrchli1-11#* CGGGGAAGTCCACGACTGTTAGG (×15)  
*ptrchli1-14#* CGGGGAAGTCCACGACTGTTAGG (×15)  
*ptrchli1-15#* CGGGGAAGTCCACGACTGTTAGG (×15)

**gCHLI1b-off-2**

WT CCGGAAAGTCCACCAATTCTAAT (×10)  
*ptrchli1-1#* CCGGAAAGTCCACCAATTCTAAT (×15)  
*ptrchli1-11#* CCGGAAAGTCCACCAATTCTAAT (×15)  
*ptrchli1-12#* CCGGAAAGTCCACCAATTCTAAT (×15)  
*ptrchli1-15#* CCGGAAAGTCCACCAATTCTAAT (×15)  
*ptrchli1-16#* CCGGAAAGTCCACCAATTCTAAT (×15)  
*ptrchli1-17#* CCGGAAAGTCCACCAATTCTAAT (×15)

**gCHL1b-off-3**

WT TCAGAAAGTCCACCACGGTTTAC (×10)  
*ptrchli1-4#* TCAGAAAGTCCACCACGGTTTAC (×15)  
*ptrchli1-5#* TCAGAAAGTCCACCACGGTTTAC (×15)  
*ptrchli1-7#* TCAGAAAGTCCACCACGGTTTAC (×15)  
*ptrchli1-11#* TCAGAAAGTCCACCACGGTTTAC (×15)  
*ptrchli1-12#* TCAGAAAGTCCACCACGGTTTAC (×15)  
*ptrchli1-14#* TCAGAAAGTCCACCACGGTTTAC (×15)

**Table S5** The Cas9/gRNA-targeted mutations in *PtrCesA4*, *7A*, *7B*, *7A/B*, *8A*, *8B* and *8A/B* genes of *Populus trichocarpa*.

| <b>Gene: Potri.002G257900 (<i>PtrCesA4</i>)</b>                                                                                                                                                                                                                 |                                                                                                 |                                                                           |              |                                                                                                |                                                                           |            |
|-----------------------------------------------------------------------------------------------------------------------------------------------------------------------------------------------------------------------------------------------------------------|-------------------------------------------------------------------------------------------------|---------------------------------------------------------------------------|--------------|------------------------------------------------------------------------------------------------|---------------------------------------------------------------------------|------------|
| <b>Vector:</b> Cas9/gRNA-PtrCesA4-1<br><b>gRNA:</b> gCesA4-1 (CATACGATGCTTATGCATTG <u>TGG</u> ); gCesA4-2 ( <u>CCC</u> ATTCGTCCGGCCTTTTCGTC)<br><b>Target sequences:</b> CesA4-1, CATACGATGCTTATGCATTG <u>TGG</u> ; CesA4-2, <u>CCC</u> ATTCGTCCGGCCTTTTCGTC    |                                                                                                 |                                                                           |              |                                                                                                |                                                                           |            |
| Line (#)                                                                                                                                                                                                                                                        | gCesA4-1<br>CATACGATGCTTATGCATTG <u>TGG</u>                                                     | Mutation types<br>(Number of plasmids containing the cloned PCR products) |              | gCesA4-2<br><u>CCC</u> ATTCGTCCGGCCTTTTCGTC                                                    | Mutation types<br>(Number of plasmids containing the cloned PCR products) |            |
| <i>ptrcesa4-1#</i>                                                                                                                                                                                                                                              | TCCAGCATAACGATGCTTATGC - TTG <u>TGG</u> CCTTAT<br>TCCAGCATAACGATGCTTATGCATTG <u>TGG</u> CCTTAT  | -1 (×14)<br>0 (×11)                                                       | heterozygous | TGCAC <u>CCC</u> ATTCGT --- GCCTTTTCGTCAGCAG<br>TGCAC <u>CCC</u> ATT a CGTCCGGCCTTTTCGTCAGCAG  | -3 (×14)<br>+1 (×11)                                                      | biallelic  |
| <i>ptrcesa4-2#</i>                                                                                                                                                                                                                                              | TCCAGCATAACGATGCTTATGC - TTG <u>TGG</u> CCTTAT<br>TCCAGCATAACGATGCTTATGCATTG <u>TGG</u> CCTTAT  | -1 (×17)<br>0 (×8)                                                        | heterozygous | TGCAC <u>CCC</u> ATT c CGTCCGGCCTTTTCGTCAGCAG<br>TGCAC <u>CCC</u> ATT t CGTCCGGCCTTTTCGTCAGCAG | +1 (×15)<br>+1 (×10)                                                      | biallelic  |
| <i>ptrcesa4-3#</i>                                                                                                                                                                                                                                              | ----- GT <u>TGG</u> CCTTAT<br>TCCAGCATAACGATGCTTATGCA a TTG <u>TGG</u> CCTTAT                   | -127 (×16)<br>+1 (×9)                                                     | biallelic    | TGCAC <u>CCC</u> ATT ----- TCGTCAGCAG<br>TGCAC <u>CCC</u> ATT a CGTCCGGCCTTTTCGTCAGCAG         | -12 (×16)<br>+1 (×9)                                                      | biallelic  |
| <i>ptrcesa4-4#</i>                                                                                                                                                                                                                                              | TCCAGCATAACGATGCTTATGCA a TTG <u>TGG</u> CCTTAT<br>TCCAGCATAACGATGCTTATGCATTG <u>TGG</u> CCTTAT | +1 (×11)<br>0 (×14)                                                       | heterozygous | TGCAC <u>CCC</u> ATT ----- GGCCTTTTCGTCAGCAG                                                   | -5 (×25)                                                                  | homozygous |
| <b>Vector:</b> Cas9/gRNA-PtrCesA4-2<br><b>gRNA:</b> gCesA4-3 (CATCTGTGTTAGAACTTCGAT <u>TGG</u> ); gCesA4-4 ( <u>CCT</u> CCTCAAGGTCCTTGGAGGAG)<br><b>Target sequences:</b> CesA4-3, CATCTGTGTTAGAACTTCGAT <u>TGG</u> ; CesA4-4, <u>CCT</u> CCTCAAGGTCCTTGGAGGAG  |                                                                                                 |                                                                           |              |                                                                                                |                                                                           |            |
| Line (#)                                                                                                                                                                                                                                                        | gCesA4-3<br>CATCTGTGTTAGAACTTCGAT <u>TGG</u>                                                    | Mutation types<br>(Number of plasmids containing the cloned PCR products) |              | gCesA4-4<br><u>CCC</u> ATTCGTCCGGCCTTTTCGTC                                                    | Mutation types<br>(Number of plasmids containing the cloned PCR products) |            |
| <i>ptrcesa4-5#</i>                                                                                                                                                                                                                                              | AGCAACATCTGTGTTAGAA --- CGAT <u>TGG</u> AGTGG<br>AGCAACATCTGTGTTAGAAC -- CGAT <u>TGG</u> AGTGG  | -3 (×13)<br>-2 (×12)                                                      | biallelic    | CAAGG <u>CCT</u> CCTCAAGGTCCTTGGAGGAGTAGAC                                                     | 0 (×25)                                                                   | WT         |
| <i>ptrcesa4-6#</i>                                                                                                                                                                                                                                              | AGCAACATCTGTGTTAGAACT - CGAT <u>TGG</u> AGTGG<br>AGCAACATCTGTGTTAGAACT -----                    | -1 (×12)<br>-127<br>(×13)                                                 | biallelic    | CAAGG <u>CCT</u> CCT - AAGGTCCTTGGAGGAGTAGAC<br>----- AACTTCACTGTTA                            | -1 (×12)<br>-127 (×13)                                                    | biallelic  |
| <b>Gene: Potri.006G181900 (<i>PtrCesA7A</i>)</b>                                                                                                                                                                                                                |                                                                                                 |                                                                           |              |                                                                                                |                                                                           |            |
| <b>Vector:</b> Cas9/gRNA-PtrCesA7A-1<br><b>gRNA:</b> gCesA7A-a (CTATTATTGCAGGTTAGACG <u>AGG</u> ); gCesA7A-b ( <u>CC</u> CATTGGATCTCATGGAGAGC)<br><b>Target sequences:</b> CesA7A-a, CTATTATTGCAGGTTAGACG <u>AGG</u> ; CesA7A-b, <u>CC</u> CATTGGATCTCATGGAGAGC |                                                                                                 |                                                                           |              |                                                                                                |                                                                           |            |

| Line (#)                                                                                                                                                                                                                                                          | <b>gCesA7A-a</b><br>CTATTATTGCAGGTTAGACG <u>AGG</u>                                            | <b>Mutation types</b><br>(Number of plasmids containing the cloned PCR products) |              | <b>gCesA7A-b</b><br><u>CCCTATTGGATCTCATGGAGAGC</u>                                            | <b>Mutation types</b><br>(Number of plasmids containing the cloned PCR products) |              |
|-------------------------------------------------------------------------------------------------------------------------------------------------------------------------------------------------------------------------------------------------------------------|------------------------------------------------------------------------------------------------|----------------------------------------------------------------------------------|--------------|-----------------------------------------------------------------------------------------------|----------------------------------------------------------------------------------|--------------|
| <i>ptrcesa7A-1#</i>                                                                                                                                                                                                                                               | GTGAACTATTATTGCAGGTTA - ACG <u>AGG</u> CAAGA                                                   | -1 (×25)                                                                         | homozygous   | GAGTT <u>CCCTAT</u> - GGATCTCATGGAGAGCAGATG                                                   | -1 (×25)                                                                         | homozygous   |
| <i>ptrcesa7A-2#</i>                                                                                                                                                                                                                                               | GTGAACTATTATTGCAGGTT - - ACG <u>AGG</u> CAAGA<br>GTGAACTATTATTGCAGGTTAG g ACG <u>AGG</u> CAAGA | +1 (×15)<br>-2 (×10)                                                             | biallelic    | GAGTT <u>CCCTAT</u> tGGATCTCATGGAGAGCAGAT<br>GAGTT <u>CCCTAT</u> - - - - CTCATGGAGAGCAGATG    | +1 (×10)<br>-5 (×15)                                                             | biallelic    |
| <b>Vector:</b> Cas9/gRNA-PtrCesA7A-2<br><b>gRNA:</b> gCesA7A-c (GACAGGAATGGATAACGAGA <u>AGG</u> ); gCesA7A-d ( <u>CCAT</u> GACACTGAAGGAAATGAGC)<br><b>Target sequences:</b> CesA7A-c, GACAGGAATGGATAACGAGA <u>AGG</u> ; CesA7A-d, <u>CCAT</u> GACACTGAAGGAAATGAGC |                                                                                                |                                                                                  |              |                                                                                               |                                                                                  |              |
| Line (#)                                                                                                                                                                                                                                                          | <b>gCesA7A-c</b><br>GACAGGAATGGATAACGAGA <u>AGG</u>                                            | <b>Mutation types</b><br>(Number of plasmids containing the cloned PCR products) |              | <b>gCesA7A-d</b><br><u>CCAT</u> GACACTGAAGGAAATGAGC                                           | <b>Mutation types</b><br>(Number of plasmids containing the cloned PCR products) |              |
| <i>ptrcesa7A-3#</i>                                                                                                                                                                                                                                               | (inverted 834 ) AGA <u>AGG</u> AGCTA                                                           | inversion (×25)                                                                  | homozygous   | GGAGG <u>CCAT</u> GTA (inverted 834 )<br>GGAGG <u>CCAT</u> - - (-2+inverted 834 )             | inversion (×17)<br>inversion (×8)                                                | biallelic    |
| <i>ptrcesa7A-4#</i>                                                                                                                                                                                                                                               | (inverted 834 ) AGA <u>AGG</u> AGCTA                                                           | inversion (×25)                                                                  | homozygous   | GGAGG <u>CCAT</u> GTA (inverted 834 )                                                         | inversion (×25)                                                                  | homozygous   |
| <i>ptrcesa7A-5#</i>                                                                                                                                                                                                                                               | TGCTGGACAGGAATGGATAAC - AGA <u>AGG</u> AGCTA<br>TGCTGGACAGGAATGGATAACgtAGA <u>AGG</u> AGCTA    | -1 (×19)<br>+1 (×6)                                                              | biallelic    | GGAGG <u>CCAT</u> GACACTGAAGGAAATGAGCTCCCT<br>GGAGG <u>CCAT</u> GAACTGAAGGAAATGAGCTCCCT       | +1 (×19)<br>0 (×6)                                                               | heterozygous |
| <i>ptrcesa7A-6#</i>                                                                                                                                                                                                                                               | TGCTGGACAGGAATGGATAAC - - GA <u>AGG</u> AGCTA                                                  | -2 (×25)                                                                         | homozygous   | GGAGG <u>CCAT</u> GAgCACTGAAGGAAATGAGCTCCCT<br>GGAGG <u>CCAT</u> GACACTGAAGGAAATGAGCTCCCT     | +1 (×8)<br>0 (×17)                                                               | heterozygous |
| <i>ptrcesa7A-7#</i>                                                                                                                                                                                                                                               | TGCTGGACAGGAATGGATAAC - AGA <u>AGG</u> AGCTA                                                   | -1 (×25)                                                                         | homozygous   | GGAGG <u>CCAT</u> GTA - ACTGAAGGAAATGAGCTCCCT                                                 | -1 (×25)                                                                         | homozygous   |
| <b>Gene:</b> Potri.018G103900 ( <i>PtrCesA7B</i> )                                                                                                                                                                                                                |                                                                                                |                                                                                  |              |                                                                                               |                                                                                  |              |
| <b>Vector:</b> Cas9/gRNA-PtrCesA7B-1<br><b>gRNA:</b> gCesA7B-a (ACAAGATGACGATGCAGAAG <u>CGG</u> ); gCesA7B-b ( <u>CCATT</u> GGATCTCATGGAGAACAG)<br><b>Target sequences:</b> CesA7B-a, ACAAGATGACGATGCAGAAG <u>CGG</u> ; CesA7B-b, <u>CCATT</u> GGATCTCATGGAGAACAG |                                                                                                |                                                                                  |              |                                                                                               |                                                                                  |              |
| Line (#)                                                                                                                                                                                                                                                          | <b>gCesA7B-a</b><br>ACAAGATGACGATGCAGAAG <u>CGG</u>                                            | <b>Mutation types</b><br>(Number of plasmids containing the cloned PCR products) |              | <b>gCesA7B-b</b><br><u>CCATT</u> GGATCTCATGGAGAACAG                                           | <b>Mutation types</b><br>(Number of plasmids containing the cloned PCR products) |              |
| <i>ptrcesa7B-1#</i>                                                                                                                                                                                                                                               | CCTGAACAAGATGACGATGCAG - AG <u>CGG</u> CCATG<br>CCTGAACAAGATGACGATGCAGAAG <u>CGG</u> CCATG     | +1 (×16)<br>0 (×9)                                                               | heterozygous | GTTCT <u>CCATT</u> G t GATCTCATGGAGAACAGATGCT<br>GTTCT <u>CCATT</u> G - ATCTCATGGAGAACAGATGCT | +1 (×19)<br>-1 (×6)                                                              | biallelic    |
| <i>ptrcesa7B-2#</i>                                                                                                                                                                                                                                               | CCTGAACAAG - - - - - AAG <u>CGG</u> CCATG<br>CCTGAACAAGATGACGAT - - - - AAG <u>CGG</u> CCATG   | -12 (×10)<br>-4(×25)                                                             | biallelic    | GTTCT <u>CCATT</u> G - ATCTCATGGAGAACAGATGCT<br>GTTCT <u>CCATT</u> G t GATCTCATGGAGAACAGATGCT | -1 (×11)                                                                         | biallelic    |

|                                                                                                                                                                                                                                                |                                                                              |                                                                           |              |                                                                           | +1 (×14)                                                                  |              |
|------------------------------------------------------------------------------------------------------------------------------------------------------------------------------------------------------------------------------------------------|------------------------------------------------------------------------------|---------------------------------------------------------------------------|--------------|---------------------------------------------------------------------------|---------------------------------------------------------------------------|--------------|
| <b>Vector:</b> Cas9/gRNA-PtrCesA7B-2<br><b>gRNA:</b> gCesA7B-c (GCCCAATATGCTTGCTCCAGTGG); gCesA7B-d ( <u>CCAGCAAGATCAATCCGTATAGA</u> )<br><b>Target sequences:</b> CesA7B-c, GCCCAATATGCTTGCTCCAGTGG; CesA7B-d, <u>CCAGCAAGATCAATCCGTATAGA</u> |                                                                              |                                                                           |              |                                                                           |                                                                           |              |
| Line (#)                                                                                                                                                                                                                                       | gCesA7B-c<br>GCCCAATATGCTTGCTCCAGTGG                                         | Mutation types<br>(Number of plasmids containing the cloned PCR products) |              | gCesA7B-d<br><u>CCAGCAAGATCAATCCGTATAGA</u>                               | Mutation types<br>(Number of plasmids containing the cloned PCR products) |              |
| <i>ptrcesa7B-3#</i>                                                                                                                                                                                                                            | (inverted 407 ) CAGTGGATATC<br>GGCGAGCCCAATATGCTTGCTC † CAGTGGATATC          | inversion (×15)<br>+1 (×10)                                               | biallelic    | TGCATCCAGCA (inverted 407 )<br>TGCATCCAGCA - GATCAATCCGTATAGAATGGT        | inversion (×15)<br>-1 (×10)                                               | biallelic    |
| <i>ptrcesa7B-4#</i>                                                                                                                                                                                                                            | (inverted 407 ) CAGTGGATATC                                                  | inversion (×25)                                                           | homozygous   | TGCATCCAGCA (inverted 407 )                                               | inversion (×25)                                                           | homozygous   |
| <i>ptrcesa7B-5#</i>                                                                                                                                                                                                                            | (inverted 407 ) CAGTGGATATC<br>GGCGAGCCCAATATGCTTGC - - CAGTGGATATC          | inversion (×11)<br>-2 (×14)                                               | biallelic    | TGCATCCAGCA (inverted 407 )<br>TGCATCCAGCA - GATCAATCCGTATAGAATGGT        | inversion (×11)<br>-1 (×14)                                               | biallelic    |
| <i>ptrcesa7B-6#</i>                                                                                                                                                                                                                            | (inverted 407 ) CAGTGGATATC<br>GGCGAGCCCAATATGCTTGC - - CAGTGGATATC          | inversion (×16)<br>-2 (×9)                                                | biallelic    | TGCATCCAGCA (inverted 407 )<br>TGCATCCAGCA - GATCAATCCGTATAGAATGGT        | inversion (×16)<br>-1 (×9)                                                | biallelic    |
| <i>ptrcesa7B-7#</i>                                                                                                                                                                                                                            | GGCGAGCCCAATATGC - - - - - CAGTGGATATC<br>GGCGAGCCCAATATGCTTGCTC CAGTGGATATC | -6 (×18)<br>0 (×7)                                                        | heterozygous | TGCATCCAGCAA - GATCAATCCGTATAGAATGGT<br>TGCATCCAGCAAGATCAATCCGTATAGAATGGT | -1 (×18)<br>0 (×7)                                                        | heterozygous |
| <i>ptrcesa7B-8#</i>                                                                                                                                                                                                                            | (inverted 407 ) CAGTGGATATC<br>GGCGAGCCCAATATGCTTGC - - CAGTGGATATC          | inversion (×13)<br>-2 (×12)                                               | biallelic    | TGCATCCAGCA (inverted 407 )<br>TGCATCCAGCA - GATCAATCCGTATAGAATGGT        | inversion (×13)<br>-1 (×12)                                               | biallelic    |
| <b>Gene:</b> Potri.011G069600 ( <i>PtrCesA8A</i> )                                                                                                                                                                                             |                                                                              |                                                                           |              |                                                                           |                                                                           |              |
| <b>Vector:</b> Cas9/gRNA-PtrCesA8A-1<br><b>gRNA:</b> gCesA8A-a (TTGTTTCGAGTATGAGATCAAGG); gCesA8A-b ( <u>CCAGGTGGGACATGATGCAAATG</u> )<br><b>Target sequences:</b> CesA8A-a, TTGTTTCGAGTATGAGATCAAGG; CesA8A-b, <u>CCAGGTGGGACATGATGCAAATG</u> |                                                                              |                                                                           |              |                                                                           |                                                                           |              |
| Line (#)                                                                                                                                                                                                                                       | gCesA8A-a<br>TTGTTTCGAGTATGAGATCAAGG                                         | Mutation types<br>(Number of plasmids containing the cloned PCR products) |              | gCesA8A-b<br><u>CCAGGTGGGACATGATGCAAATG</u>                               | Mutation types<br>(Number of plasmids containing the cloned PCR products) |              |
| <i>ptrcesa8A-1#</i>                                                                                                                                                                                                                            | ... - - - - - ATCAAGGAGGGG                                                   | -82 (×25)                                                                 | homozygous   | GGTGACCAGGT - - - - -                                                     | -82 (×25)                                                                 | homozygous   |
| <i>ptrcesa8A-2#</i>                                                                                                                                                                                                                            | ... - - - - - ATCAAGGAGGGG<br>AAGTCTTGTTTCGAGTATGAGAcTCAAGGAGGGG             | -82 (×19)<br>+1 (×6)                                                      | biallelic    | GGTGACCAGGT - - - - -<br>GGTGACCAGGT - - GACATGATGCAAATGGAGAC             | -82 (×19)<br>-2 (×6)                                                      | biallelic    |

| <b>Vector:</b> Cas9/gRNA-PtrCesA8A-2<br><b>gRNA:</b> gCesA8A-c (GGGAAATGAACTACCTCGACTGG); gCesA8A-d (CCGGAGCTCGTGACATAGAGGGA)<br><b>Target sequences:</b> CesA8A-c, GGGAAATGAACTACCTCGACTGG; CesA8A-d, CCGGAGCTCGTGACATAGAGGGA   |                                                                            |                                                                                 |              |                                                                               |                                                                                 |              |
|----------------------------------------------------------------------------------------------------------------------------------------------------------------------------------------------------------------------------------|----------------------------------------------------------------------------|---------------------------------------------------------------------------------|--------------|-------------------------------------------------------------------------------|---------------------------------------------------------------------------------|--------------|
| Line (#)                                                                                                                                                                                                                         | gCesA8A-c<br>GGGAAATGAACTACCTCGACTGG                                       | Mutation types<br>(Number of plasmids<br>containing the cloned<br>PCR products) |              | gCesA8A-d<br>CCGGAGCTCGTGACATAGAGGGA                                          | Mutation types<br>(Number of plasmids<br>containing the cloned PCR<br>products) |              |
| <i>ptrcesa8A-3#</i>                                                                                                                                                                                                              | ATAGAGGGAAATGAACTACCT -- ACTGGTATAT                                        | -2 (×25)                                                                        | homozygous   | AAACACCGGAGa TCGTGACATAGAGGGAAATGA                                            | +1 (×25)                                                                        | homozygous   |
| <i>ptrcesa8A-4#</i>                                                                                                                                                                                                              | ATAGAGGGAAATGAACTACCTC - ACTGGTATAT<br>ATAGAGGGAAATGAACTACCT -- ACTGGTATAT | -1 (×9)<br>-2 (×16)                                                             | biallelic    | AAACACCGGAGg TCGTGACATAGAGGGAAATGA<br>AAACACCGGAGaCTCGTGACATAGAGGGAAATGA      | +1 (×9)<br>+1 (×16)                                                             | biallelic    |
| <i>ptrcesa8A-5#</i>                                                                                                                                                                                                              | ATAGAGGGAAATGAACTACCTCGACTGGTATAT                                          | 0 (×25)                                                                         | WT           | AAACACCGGAG ----- AGGGAAATGA                                                  | -12 (×25)                                                                       | homozygous   |
| <i>ptrcesa8A-6#</i>                                                                                                                                                                                                              | ATAGAGGGAAATGAACTA ----- ACTGGTATAT                                        | -5 (×25)                                                                        | homozygous   | ... ----- -CGTGACATAGAGGGAAATGA                                               | -16 (×25)                                                                       | homozygous   |
| <i>ptrcesa8A-7#</i>                                                                                                                                                                                                              | ... ----- GACTGGTATAT                                                      | -30 (×25)                                                                       | homozygous   | AAACACCGGAG ----- ...                                                         | -30 (×25)                                                                       | homozygous   |
| <b>Gene:</b> Potri.004G059600 ( <i>PtrCesA8B</i> )                                                                                                                                                                               |                                                                            |                                                                                 |              |                                                                               |                                                                                 |              |
| <b>Vector:</b> Cas9/gRNA-PtrCesA8B-1<br><b>gRNA:</b> gCesA8B-a (AGGGCCGGAAAGTTTGCTTGCGG); gCesA8B-b (CCTGAAAATCCCTTCCATTTGCT)<br><b>Target sequences:</b> CesA8B-a, AGGGCCGGAAAGTTTGCTTGCGG; CesA8B-b, CCTGAAAATCCCTTCCATTTGCT   |                                                                            |                                                                                 |              |                                                                               |                                                                                 |              |
| Line (#)                                                                                                                                                                                                                         | gCesA8B-a<br>AGGGCCGGAAAGTTTGCTTGCGG                                       | Mutation types<br>(Number of plasmids<br>containing the cloned<br>PCR products) |              | gCesA8B-b<br>CCTGAAAATCCCTTCCATTTGCT                                          | Mutation types<br>(Number of plasmids<br>containing the cloned PCR<br>products) |              |
| <i>ptrcesa8B-1#</i>                                                                                                                                                                                                              | CAAAGAGGGCCGGAAAGTTTGC ----- ...                                           | -172 (×25)                                                                      | homozygous   | ... ----- -AATCCCTTCCATTTGCTTGTTA                                             | -172 (×25)                                                                      | homozygous   |
| <i>ptrcesa8B-2#</i>                                                                                                                                                                                                              | CAAAGAGGGCCGGAAAGTTTGC t TTGCGGTGCGG                                       | +1 (×25)                                                                        | homozygous   | ATATTCCTIGAA - ATCCCTTCCATTTGCTTGTTA                                          | -1 (×25)                                                                        | homozygous   |
| <i>ptrcesa8B-3#</i>                                                                                                                                                                                                              | CAAAGAGGGCCGGAAAGTTTGC a TTGCGGTGCGG<br>CAAAGAGGGCCGGAAAGTTTGCTTGCGGTGCGG  | +1 (×22)<br>0 (×3)                                                              | heterozygous | ATATTCCTIGAA t AATCCCTTCCATTTGCTTGTTA<br>ATATTCCTIGAA -- TCCCTTCCATTTGCTTGTTA | +1 (×13)<br>-2 (×12)                                                            | heterozygous |
| <b>Vector:</b> Cas9/gRNA-PtrCesA8B-2<br><b>gRNA:</b> gCesA8B-c (GGTGAGCCTTCTCAGCTTGCTGG); gCesA8B-d (CCTGCTTTCTCCAGAGAAGCTTGC)<br><b>Target sequences:</b> CesA8B-c, GGTGAGCCTTCTCAGCTTGCTGG; CesA8B-d, CCTGCTTTCTCCAGAGAAGCTTGC |                                                                            |                                                                                 |              |                                                                               |                                                                                 |              |
| Line (#)                                                                                                                                                                                                                         | gCesA8B-c<br>GGTGAGCCTTCTCAGCTTGCTGG                                       | Mutation types<br>(Number of plasmids<br>containing the cloned<br>PCR products) |              | gCesA8B-d<br>CCTGCTTTCTCCAGAGAAGCTTGC                                         | Mutation types<br>(Number of plasmids<br>containing the cloned PCR<br>products) |              |



| <i>ptrcesa8B-4#</i>                                                                                                                                                                                                                                                                                          | GAGAGGGTGAGCCTTCTC - - - - TGCTGGTGTGG<br>GAGAGGGTGAGCCTTCTCAGCTTGCTGGTGTGG       | -4 (×19)<br>0 (×6)                                                              | heterozygous | TTATGCCTGCTTTCTCCAGAGAACTTGCTGGAT                                                 | 0 (×25)                                                                         | WT         |
|--------------------------------------------------------------------------------------------------------------------------------------------------------------------------------------------------------------------------------------------------------------------------------------------------------------|-----------------------------------------------------------------------------------|---------------------------------------------------------------------------------|--------------|-----------------------------------------------------------------------------------|---------------------------------------------------------------------------------|------------|
| <i>ptrcesa8B-5#</i>                                                                                                                                                                                                                                                                                          | GAGAGGGTGAGCCTTCTCAGC - TGCTGGTGTGG                                               | -1 (×25)                                                                        | homozygous   | TTATGCCTGCT - - - - CCAGAGAACTTGCTGGAT                                            | -4 (×25)                                                                        | homozygous |
| <b>Gene:</b> Potri.006G181900 ( <i>PtrCesA7A</i> )/Potri.018G103900 ( <i>PtrCesA7B</i> )                                                                                                                                                                                                                     |                                                                                   |                                                                                 |              |                                                                                   |                                                                                 |            |
| <b>Vector:</b> Cas9/gRNA-PtrCesA7A/B-1<br><b>gRNA:</b> gCesA7A/B-1 (ACGCAAAGAAAGAGGGAGGGTGG); gCesA7A/B-2 (CCATATCCAGTTTCTGAACCTGG)<br><b>Target sequences:</b> CesA7A-1, ACGCAAAGAAAGAGGGAGGGTGG; CesA7A-2, CCATATCCAGTTTCTGAACCTGG<br>CesA7B-1, ACGAAAAGAAAGAGGGAGGGTGG; CesA7B-2, CCATATCCAGTTTCTGAACCTGG |                                                                                   |                                                                                 |              |                                                                                   |                                                                                 |            |
| Line (#)                                                                                                                                                                                                                                                                                                     | gCesA7A/B-1<br>CesA7A, ACGCAAAGAAAGAGGGAGGGTGG<br>CesA7B, ACGAAAAGAAAGAGGGAGGGTGG | Mutation types<br>(Number of plasmids<br>containing the cloned PCR<br>products) |              | gCesA7A/B-2<br>CesA7A, CCATATCCAGTTTCTGAACCTGG<br>CesA7B, CCATATCCAGTTTCTGAACCTGG | Mutation types<br>(Number of plasmids<br>containing the cloned PCR<br>products) |            |
| <i>ptrcesa7ab-1#-7A</i><br><br>-7B                                                                                                                                                                                                                                                                           | ... ----- AGGGTGGAAAGA                                                            | -138 (×25)                                                                      | homozygous   | TGCACCCATAT - - - - - ...                                                         | -138 (×25)                                                                      | homozygous |
|                                                                                                                                                                                                                                                                                                              | ATGGGACGAAAAGAAAGAGG - -<br>GGGTGGAAAGA                                           | -2 (×25)                                                                        | homozygous   | TGCACCA - - - - CCAGTTTCTGAACCTGGTATTT                                            | -4 (×25)                                                                        | homozygous |
| <i>ptrcesa7ab-2#-7A</i><br><br>-7B                                                                                                                                                                                                                                                                           | ... ----- AAAGA                                                                   | -39 (×17)                                                                       | biallelic    | TGCACCCATA - CCAGTTTCTGAACCTGGTATTT                                               | -1 (×10)                                                                        | chimera    |
|                                                                                                                                                                                                                                                                                                              | ... ----- GGGTGGAAAGA                                                             | -139 (×8)                                                                       |              | TGCACCCATAT - - - - - ...                                                         | -139 (×8)                                                                       |            |
|                                                                                                                                                                                                                                                                                                              | ... ----- GGTGGAAAGA                                                              | -133 (×25)                                                                      | homozygous   | TGCACCCATATCCAGTTTCTGAACCTGGTATTT                                                 | 0 (×7)                                                                          | homozygous |
| <i>ptrcesa7ab-3#-7A</i><br><br>-7B                                                                                                                                                                                                                                                                           | ... ----- TGCCTTCTCTC                                                             | -645 (×11)                                                                      | biallelic    | TGGATCTCATGGA - - - - - ...                                                       | -645 (×11)                                                                      | biallelic  |
|                                                                                                                                                                                                                                                                                                              | ... ----- AGGGTGGAAAGA                                                            | -315 (×14)                                                                      |              | GTCAGATCAAGAC - - - - - ...                                                       | -315 (×14)                                                                      |            |
|                                                                                                                                                                                                                                                                                                              | ... ----- GGGTGGAAAGA<br>ATGGGACGAAAAGAAAGAGGGAaGGGTGGAAAG<br>GA                  | -129 (×13)<br>+1 (×12)                                                          | biallelic    | TGCACCCATATC - - - - - ...                                                        | -129 (×13)                                                                      | biallelic  |
|                                                                                                                                                                                                                                                                                                              | +1 (×12)                                                                          | TGCACCCATAT c CCAGTTTCTGAACCTGGTATTT                                            |              | +1 (×12)                                                                          |                                                                                 |            |
| <i>ptrcesa7ab-4#-7A</i><br><br>-7B                                                                                                                                                                                                                                                                           | TGGGACGCAAAGAAAGAGGGAaGGGTGGAAAG                                                  | +1 (×25)                                                                        | homozygous   | TGCACCCATATC^276CAGTTTCTGAACCTGGTATT                                              | +276 (×25)                                                                      | homozygous |
|                                                                                                                                                                                                                                                                                                              | TGGGACGAAAAGAAAGAGGG - GGGTGGAAAG<br>TGGGACGAAAAGAAAGAG - - - - -                 | -1 (×11)<br>-15 (×14)                                                           | biallelic    | TGCACCCAT - - - - - TCTGAACCTGGTATTT                                              | -8 (×11)                                                                        | biallelic  |
|                                                                                                                                                                                                                                                                                                              | -15 (×14)                                                                         | TGCACCC - - - - - CAGTTTCTGAACCTGGTATTT                                         |              | -5 (×14)                                                                          |                                                                                 |            |
| <b>Vector:</b> Cas9/gRNA-PtrCesA7A/B-2<br><b>gRNA:</b> gCesA7A/B-3 (TTTTGTGACTTCAACTTTAATGG); gCesA7A/B-4 (CCTCCTTCCTCGAGTCCAGCGGC)<br><b>Target sequences:</b> CesA7A-3, TTTTGTGACTTCAACTTTAATGG; CesA7A-4, CCTCCTTCCTCGAGTCCAGCGGC<br>CesA7B-3, TTTTGTGACTTCAACTTTAATGG; CesA7B-4, CCTCCTTCCTCGAGTCCAGCGGC |                                                                                   |                                                                                 |              |                                                                                   |                                                                                 |            |
| Line (#)                                                                                                                                                                                                                                                                                                     | gCesA7A/B-3<br>CesA7A, TTTTGTGACTTCAACTTTAATGG<br>CesA7B, TTTTGTGACTTCAACTTTAATGG | Mutation types<br>(Number of plasmids<br>containing the cloned PCR<br>products) |              | gCesA7A/B-4<br>CesA7A, CCTCCTTCCTCGAGTCCAGCGGC<br>CesA7B, CCTCCTTCCTCGAGTCCAGCGGC | Mutation types<br>(Number of plasmids<br>containing the cloned PCR<br>products) |            |
| <i>ptrcesa7ab-5#-7A</i>                                                                                                                                                                                                                                                                                      | GCAATTTTGTGACTTCAACTTTAATGGAAAGAA                                                 | 0 (×25)                                                                         | WT           | GCGTACCTCCT - - - - CGAGTCCAGCGGCTCTGC                                            | -4 (×16)                                                                        | biallelic  |

|                                                                                           |                                            |           |              |                                                                                                                                                                |                                |              |
|-------------------------------------------------------------------------------------------|--------------------------------------------|-----------|--------------|----------------------------------------------------------------------------------------------------------------------------------------------------------------|--------------------------------|--------------|
| <b>-7B</b>                                                                                |                                            |           |              | GCGTACC --- TTCCTCGAGTCCAGCGGCTCTGC                                                                                                                            | -3 (×9)                        |              |
|                                                                                           | GCAATTTTTGTGACTTCAACTTTAAT <u>TGGAAGAA</u> | 0 (×25)   | WT           | GTGTACCTCCT t TCCTCGAGTCCGGCAGCTCTGC<br>GTGTACCTCCT - CCTCGAGTCCGGCAGCTCTGC                                                                                    | +1 (×15)<br>-1 (×10)           | biallelic    |
| <i>ptrcesa7ab-6#-7A</i><br><b>-7B</b>                                                     | GCAATTTTTGTGACTTCAACTTTAAT <u>TGGAAGAA</u> | 0 (×25)   | WT           | GCGTACCTCCT - CCTCGAGTCCAGCGGCTCTGC<br>GCGTACCTC ----- GAGTCCAGCGGCTCTGC<br>GCGTACCTCCTTCCTCGAGTCCAGCGGCTCTGC                                                  | -1 (×13)<br>-7 (×9)<br>0 (×3)  | chimeric     |
|                                                                                           | GCAATTTTTGTGACTTCAACTTTAAT <u>TGGAAGAA</u> | 0 (×25)   | WT           | GTGTACCTCCT a TCCTCGAGTCCGGCAGCTCTGC<br>GT ----- CCTCGAGTCCGGCAGCTCTGC<br>GTGTACCTCCTTCCTCGAGTCCGGCAGCTCTGC                                                    | +1 (×9)<br>-10 (×12)<br>0 (×4) | chimeric     |
| <i>ptrcesa7ab-7#-7A</i><br><b>-7B</b>                                                     | GCAATTTTTGTGACTTCAACTTTAAT <u>TGGAAGAA</u> | 0 (×25)   | WT           | GCGTACCTCCTT a CCTCGAGTCCAGCGGCTCTGC                                                                                                                           | +1 (×25)                       | homozygous   |
|                                                                                           | GCAATTTTTGTGACTTCAACTTTAAT <u>TGGAAGAA</u> | 0 (×25)   | WT           | GTGTACCTCCT ---- CGAGTCCGGCAGCTCTGC                                                                                                                            | -4 (×25)                       | homozygous   |
| <i>ptrcesa7ab-8#-7A</i><br><b>-7B</b>                                                     | GCAATTTTTGTGACTTCAACTTTAAT <u>TGGAAGAA</u> | 0 (×25)   | WT           | GCGTACCTCCTT a CCTCGAGTCCAGCGGCTCTGC                                                                                                                           | +1 (×25)                       | homozygous   |
|                                                                                           | GCAATTTTTGTGACTTCAACTTTAAT <u>TGGAAGAA</u> | 0 (×25)   | WT           | GTGTACCTCCT ---- CGAGTCCGGCAGCTCTGC<br>GTGTACC <sup>14</sup> TCC <sup>4</sup> TTCCTCGAGTCCGGCAGCTCT<br>GC ( <sup>14</sup> : aagctattagctc <sup>4</sup> : acca) | -4 (×12)<br>+18 (×13)          | biallelic    |
| <i>ptrcesa7ab-9#-7A</i><br><b>-7B</b>                                                     | GCAATTTTTGTGACTTCAACTTTAAT <u>TGGAAGAA</u> | 0 (×25)   | WT           | GCGTACCTCCTT a CCTCGAGTCCAGCGGCTCTGC<br>GCGTACCTC ----- GAGTCCAGCGGCTCTGC                                                                                      | +1 (×11)<br>-7 (×6)            | biallelic    |
|                                                                                           | GCAATTTTTGTGACTTCAACTTTAAT <u>TGGAAGAA</u> | 0 (×25)   | WT           | GTGTACCTCCT t TCCTCGAGTCCGGCAGCTCTGC<br>GTGTACCTCCTTCCTCGAGTCCGGCAGCTCTGC                                                                                      | +1 (×18)<br>0 (×7)             | heterozygous |
| <i>ptrcesa7ab-10#-7A</i><br><b>-7B</b>                                                    | GCAATTTTTGTGACTTCAACTTTAAT <u>TGGAAGAA</u> | 0 (×25)   | WT           | GCGTACCTCCT - CCTCGAGTCCAGCGGCTCTGC<br>GCGTACCTCC --- CTCGAGTCCAGCGGCTCTGC                                                                                     | -1 (×13)<br>-3 (×12)           | biallelic    |
|                                                                                           | GCAATTTTTGTGACTTCAACTTTAAT <u>TGGAAGAA</u> | 0 (×25)   | WT           | GTGTACCTCCT a TCCTCGAGTCCGGCAGCTCTGC<br>GTGTACCTCCT - CCTCGAGTCCGGCAGCTCTGC                                                                                    | +1 (×14)<br>-1 (×11)           | biallelic    |
| <i>ptrcesa7ab-11#-7A</i><br><b>-7B</b>                                                    | GCAATTTTTGTGACTTCAACTTTAAT <u>TGGAAGAA</u> | 0 (×25)   | WT           | GCGTACCTCC -- CCTCGAGTCCAGCGGCTCTGC<br>GCGTACCTCCTT t CCTCGAGTCCAGCGGCTCTGC                                                                                    | -2 (×22)<br>+1 (×3)            | biallelic    |
|                                                                                           | GCAATTTTTGTGACTTC ----- ...                | -33 (×14) | heterozygous | ... ----- CTCGAGTCCGGCAGCTCTGC                                                                                                                                 | -33 (×14)                      | biallelic    |
|                                                                                           | GCAATTTTTGTGACTTCAACTTTAAT <u>TGGAAGAA</u> | 0 (×11)   |              | GTGTACCTC ----- TTC                                                                                                                                            | -21 (×11)                      |              |
| <i>ptrcesa7ab-12#-7A</i><br><b>-7B</b>                                                    | GCAATTTTTGTGACTTCAACTTTAAT <u>TGGAAGAA</u> | 0 (×25)   | WT           | GCGTACCTCCT ---- CGAGTCCAGCGGCTCTGC<br>GCGT ----- CCTCGAGTCCAGCGGCTCTGC                                                                                        | -4 (×16)<br>-8 (×9)            | biallelic    |
|                                                                                           | GCAATTTTTGTGACTTCAACTTTAAT <u>TGGAAGAA</u> | 0 (×25)   | WT           | GTGTAC --- TTCCTCGAGTCCGGCAGCTCTGC<br>GTGTACCTCCT - CCTCGAGTCCGGCAGCTCTGC                                                                                      | -3 (×18)<br>-1 (×7)            | biallelic    |
| <i>ptrcesa7ab-13#-7A</i><br><b>-7B</b>                                                    | GCAATTTTTGTGACTTCAACTTTAAT <u>TGGAAGAA</u> | 0 (×25)   | WT           | GCGTACCTCCT - CCTCGAGTCCAGCGGCTCTGC<br>GCGTACCTC ----- GAGTCCAGCGGCTCTGC                                                                                       | -1 (×12)<br>-7 (×13)           | biallelic    |
|                                                                                           | GCAATTTTTGTGACTTCAACTTTAAT <u>TGGAAGAA</u> | 0 (×25)   | WT           | GT ----- CCTCGAGTCCGGCAGCTCTGC                                                                                                                                 | -10 (×25)                      | homozygous   |
| <b>Gene:</b> Potri.011G069600 ( <i>PtrCesA8A</i> )/ Potri.004G059600 ( <i>PtrCesA8B</i> ) |                                            |           |              |                                                                                                                                                                |                                |              |

| <b>Vector:</b> Cas9/gRNA-PtrCesA8A/B-1<br><b>gRNA:</b> gCesA8A/B-1 (AGTTCCGCCGGAACAGCAGATGG); gCesA8A/B-2 (CCACTACAGAATAACAAATCCTG)<br><b>Target sequences:</b> CesA8A-1, AGTTCCGCCGGAACAGCAGATGG; CesA8A-2, CCACTACAGAATAACAAATCCTG<br>CesA8B-1, AGTTCCGCCGGAACAGCAGATGG; CesA8B-2, CCACTACAGAATAACAAATCCTG |                                                                                       |                                                                                 |                                   |                                                                                       |                                                                                                                                                          |              |
|--------------------------------------------------------------------------------------------------------------------------------------------------------------------------------------------------------------------------------------------------------------------------------------------------------------|---------------------------------------------------------------------------------------|---------------------------------------------------------------------------------|-----------------------------------|---------------------------------------------------------------------------------------|----------------------------------------------------------------------------------------------------------------------------------------------------------|--------------|
| Line (#)                                                                                                                                                                                                                                                                                                     | gCesA8A/B-1<br>CesA8A-1, AGTTCCGCCGGAACAGCAGATGG<br>CesA8B-1, AGTTCCGCCGGAACAGCAGATGG | Mutation types<br>(Number of plasmids<br>containing the cloned PCR<br>products) |                                   | gCesA8A/B-2<br>CesA8A-2, CCACTACAGAATAACAAATCCTG<br>CesA8B-2, CCACTACAGAATAACAAATCCTG | Mutation types<br>(Number of plasmids<br>containing the cloned PCR<br>products)                                                                          |              |
| <i>ptrcesa8ab-1#-8A</i><br><b>-8B</b>                                                                                                                                                                                                                                                                        | GCTCAAGTTCCGCCGGAACA --- GATGGAAGAG                                                   | -3 (×23)                                                                        | biallelic                         | TTCTTCCACTA ----- TAACAAATCCTGTTGAT                                                   | -5 (×23)                                                                                                                                                 | biallelic    |
|                                                                                                                                                                                                                                                                                                              | GCTCAAGTTCCGCCGGA ----- GATGGAAGAG                                                    | -5 (×2)                                                                         |                                   | TTCTTCCACTA a CAGAATAACAAATCCTGTTGAT                                                  | +1 (×2)                                                                                                                                                  |              |
|                                                                                                                                                                                                                                                                                                              | GCTCAAGTTCCGCCGGA ----- GAAGACTAAGAT<br>GCTCAAGTTCCGCCG ----- ATGGAAGAT               | -4 (×13)<br>-9 (×12)                                                            | biallelic                         | TTCTTCCACTA t CAGAATAACAAATCCTGTCGAT<br>TTCTTCCACTA a CAGAATAACAAATCCTGTCGAT          | +1 (×11)<br>+1 (×14)                                                                                                                                     | biallelic    |
| <i>ptrcesa8ab-2#-8A</i><br><b>-8B</b>                                                                                                                                                                                                                                                                        | GCTCAAGTTCCGCCGGAACAGC a AGATGGAAG                                                    | +1 (×15)                                                                        |                                   | heterozygous                                                                          | TTCTTCCACTA - AGAATAACAAATCCTGTTGAT                                                                                                                      |              |
|                                                                                                                                                                                                                                                                                                              | GCTCAAGTTCCGCCGGAACAGCAGATGGAAGA                                                      | 0 (×10)                                                                         | TTCTTCCACTACAGAATAACAAATCCTGTTGAT |                                                                                       | 0 (×15)                                                                                                                                                  |              |
|                                                                                                                                                                                                                                                                                                              | ... ----- AGATGGAAGAT                                                                 | -279 (×25)                                                                      | homozygous                        | TTCTTCCACTA t CAGAATAACAAATCCTGTCGAT                                                  | +1 (×25)                                                                                                                                                 | homozygous   |
| <i>ptrcesa8ab-3#-8A</i><br><b>-8B</b>                                                                                                                                                                                                                                                                        | GCTCAAGTTCCGCCGGAACA --- GATGGAAGAG                                                   | -3 (×18)                                                                        | biallelic                         | TTCTTCCACTACAGAATAACAAATCCTGTTGAT                                                     | 0 (×25)                                                                                                                                                  | WT           |
|                                                                                                                                                                                                                                                                                                              | GCTCAAGTTCCGCCGGA ----- GATGGAAGAG                                                    | -5 (×7)                                                                         |                                   | biallelic                                                                             | TTCTTCCACTAC a AGAATAACAAATCCTGTCGAT<br>TTCTTCCACTA a CAGAATAACAAATCCTGTCGAT<br>TTCTTCCACTA - AGAATAACAAATCCTGTCGAT<br>TTCTTCCACTACAGAATAACAAATCCTGTCGAT |              |
|                                                                                                                                                                                                                                                                                                              | GCTCAAGTTCCGCCGGA ----- GAAGACTAAGAT<br>GCTCAAGTTCCGCCG ----- ATGGAAGAT               | -4 (×13)<br>-9 (×12)                                                            |                                   |                                                                                       |                                                                                                                                                          |              |
| <b>Vector:</b> Cas9/gRNA-PtrCesA8A/B-2<br><b>gRNA:</b> gCesA8A/B-3 (GAACTGGTTGTGTTTTCAATAGG); gCesA8A/B-4 (CCACAAGTAGGTCGAGATGTATG)<br><b>Target sequences:</b> CesA8A-3, GAACTGGTTGTGTTTTCAATAGG; CesA8A-4, CCACAAGTAGGTCGAGATGTATG<br>CesA8B-3, GAACTGGTTGTGTTTTCAATAGG; CesA8B-4, CCACAAGTAGGTCGAGATGTATG |                                                                                       |                                                                                 |                                   |                                                                                       |                                                                                                                                                          |              |
| Line#                                                                                                                                                                                                                                                                                                        | gCesA8A/B-3<br>CesA8A-3, GAACTGGTTGTGTTTTCAATAGG<br>CesA8B-3, GAACTGGTTGTGTTTTCAATAGG | Mutation types<br>(Number of plasmids<br>containing the cloned PCR<br>products) |                                   | gCesA8A/B-4<br>CesA8A-4, CCACAAGTAGGTCGAGATGTATG<br>CesA8B-4, CCACAAGTAGGTCGAGATGTATG | Mutation types<br>(Number of plasmids<br>containing the cloned PCR<br>products)                                                                          |              |
| <i>ptrcesa8ab-4#-8A</i><br><b>-8B</b>                                                                                                                                                                                                                                                                        | TGTGGGAACTGGTTGTGTTTTC t AATAGGCAAG                                                   | +1 (×25)                                                                        | homozygous                        | TGGATCCACA g GTAGGTCGAGATGTATGCTAT<br>TGGATCCACAAGTAGGTCGAGATGTATGCTATG               | +1 (×3)<br>0 (×22)                                                                                                                                       | heterozygous |
|                                                                                                                                                                                                                                                                                                              | TGTGGGAACTGGTTGTGTTTTC a AATAGGCAAG                                                   | +1 (×23)                                                                        | biallelic                         | TGGATCCACAAGTAGGTCGAGATGTATGCTATG                                                     | 0 (×25)                                                                                                                                                  | WT           |
|                                                                                                                                                                                                                                                                                                              | TGTGGGAACTGGTTGTGTTTTC t AATAGGCAAG                                                   | +1 (×2)                                                                         |                                   |                                                                                       |                                                                                                                                                          |              |
| <i>ptrcesa8ab-5#-8A</i><br><b>-8B</b>                                                                                                                                                                                                                                                                        | (inverted 687) CAATAGGCAAGC                                                           | inversion<br>(×13)                                                              | biallelic                         | TGGATCCACAAG (inverted 687)<br>TGGATCCACAAGTAGGTCGAGATGTATGCTATG                      | inversion<br>(×13)<br>0 (×12)                                                                                                                            | heterozygous |
|                                                                                                                                                                                                                                                                                                              | ... ----- GGCAAGC                                                                     | -28 (×12)                                                                       |                                   |                                                                                       |                                                                                                                                                          |              |
|                                                                                                                                                                                                                                                                                                              | TGTGGGAACTGGTGA ----- AAAGGCAAGC<br>TGTGGGAACTGGTTGTG ----- GGCAAGC                   | -7 (×21)<br>-9 (×4)                                                             | biallelic                         | TGGATCCACA g GTAGGTCGAGATGTATGCTAT<br>TGGATCCACAAGTAGGTCGAGATGTATGCTATG               | +1 (×4)<br>0 (×21)                                                                                                                                       | heterozygous |

|                                                |                                                |            |            |                                             |            |              |
|------------------------------------------------|------------------------------------------------|------------|------------|---------------------------------------------|------------|--------------|
| <i>ptrcesa8ab-6#-8A</i><br><b>-8B</b>          | TGTGGGAAGCTGGTTGTGTTTTTC t AAT <u>AGG</u> CAAG | +1 (×18)   | biallelic  | TGGAT <u>CC</u> CAA a GTAGGTCGAGATGTATGCTAT | +1 (×22)   | heterozygous |
|                                                | TGTGGGAAGCTGGT ----- ...                       | -31 (×7)   |            | TGGAT <u>CC</u> CAAGTAGGTCGAGATGTATGCTATG   | 0 (×3)     |              |
|                                                | TGTGGGAAGCTGGTTGTGTTTTTC a AAT <u>AGG</u> CAAG | +1 (×15)   | chimeric   | TGGAT <u>CC</u> CAAGTAGGTCGAGATGTATGCTATG   | 0 (×25)    | WT           |
|                                                | TGTGGGAAGCTGGTTGTGTTTTTCaaAAT <u>AGG</u> CAAG  | +2 (×2)    |            |                                             |            |              |
|                                                | TGTGGGAAGCTGGTTGTGTA --- AAT <u>AGG</u> CAAGC  | -3 (×8)    |            |                                             |            |              |
| <i>ptrcesa8ab-7#-8A</i><br><b>-8B</b>          | ... ----- AAT <u>AGG</u> CAAGC                 | -688 (×25) | homozygous | TGGAT <u>CC</u> CAAG ----- ...              | -688 (×25) | homozygous   |
|                                                | TGTGGGAAGCTGGTTGTGTTTTTCtatAAT <u>AGG</u> CAAG | +3 (×14)   | biallelic  | TGGAT <u>CC</u> CAAGTAGGTCGAGATGTATGCTATG   | 0 (×25)    | WT           |
| TGTGGGAAGCTGGTT ^19^ TTTTGAAT <u>AGG</u> CAAGC | +19 (×11)                                      |            |            |                                             |            |              |
|                                                | (^19^: aacatgaggtaacaacga)                     |            |            |                                             |            |              |
| <i>ptrcesa8ab-8#-8A</i><br><b>-8B</b>          | TGTGGGAAGCTGGTTGTG ----- AAT <u>AGG</u> CAAGC  | -5 (×25)   | homozygous | TGGAT <u>CC</u> CAA - TAGGTCGAGATGTATGCTATG | -1 (×5)    | heterozygous |
|                                                |                                                |            |            | TGGAT <u>CC</u> CAAGTAGGTCGAGATGTATGCTATG   | 0 (×20)    |              |
|                                                | TGTGGGAAGCTGGTTGTGT ----- AAT <u>AGG</u> CAAGC | -4 (×25)   | homozygous | TGGAT <u>CC</u> CAAGTAGGTCGAGATGTATGCTATG   | 0 (×25)    | WT           |

**Table S6** Analysis of potential off-target sites among the Cas9/gRNA-induced *ptrcesa* mutants.

| On/Off targets | gRNA name          | Bases position of gRNAs            |   |   |   |   |   |   |   |   |    |    |    |    |    |    |    |    |    |    | PAM |    |    | Target gene or genomic position | Off-target Editing (Yes/No) |    |
|----------------|--------------------|------------------------------------|---|---|---|---|---|---|---|---|----|----|----|----|----|----|----|----|----|----|-----|----|----|---------------------------------|-----------------------------|----|
|                |                    | 1                                  | 2 | 3 | 4 | 5 | 6 | 7 | 8 | 9 | 10 | 11 | 12 | 13 | 14 | 15 | 16 | 17 | 18 | 19 | 20  | 21 | 22 |                                 |                             | 23 |
| On             | <b>gCesA4-1</b>    | C                                  | A | T | A | C | G | A | T | G | C  | T  | T  | A  | T  | G  | C  | A  | T  | T  | G   | T  | G  | G                               | <b>PtrCesA4</b>             | -  |
| Off            | gCesA4-1-off-1     | G                                  | T | G | A | G | G | A | G | G | C  | T  | T  | A  | T  | G  | C  | A  | T  | T  | G   | T  | G  | G                               | Potri.019G000800            | No |
|                | gCesA4-1-off-2     | T                                  | G | A | G | G | G | A | T | G | C  | T  | T  | A  | T  | G  | C  | T  | T  | T  | G   | T  | G  | G                               | Potri.006G052600            | No |
| On             | <b>gCesA4-2</b>    | G                                  | A | C | G | A | A | A | A | G | G  | C  | C  | G  | G  | A  | C  | G  | A  | A  | T   | G  | G  | G                               | <b>PtrCesA4</b>             | -  |
| Off            | -                  | NO off-target homologous sequences |   |   |   |   |   |   |   |   |    |    |    |    |    |    |    |    |    |    | -   |    |    | -                               | -                           |    |
| On             | <b>gCesA4-3</b>    | C                                  | A | T | C | T | G | T | G | T | T  | A  | G  | A  | A  | C  | T  | T  | C  | G  | A   | T  | G  | G                               | <b>PtrCesA4</b>             | -  |
| Off            | gCesA4-3-off-1     | A                                  | A | G | A | T | G | T | T | T | G  | A  | G  | A  | A  | C  | T  | T  | C  | G  | A   | T  | G  | G                               | Potri.001G144100            | No |
|                | gCesA4-3-off-2     | T                                  | T | A | A | G | C | T | G | T | T  | A  | G  | A  | A  | C  | T  | T  | C  | G  | A   | C  | G  | G                               | Chr12 (+9333611)            | No |
| On             | <b>gCesA4-4</b>    | C                                  | T | C | C | T | C | C | A | A | G  | G  | A  | C  | C  | T  | T  | G  | A  | G  | G   | A  | G  | G                               | <b>PtrCesA4</b>             | -  |
| Off            | gCesA4-4-off-1     | T                                  | C | T | G | T | C | C | G | A | G  | G  | A  | C  | C  | T  | T  | G  | A  | G  | G   | T  | G  | G                               | Potri.014G014400            | No |
|                | gCesA4-4-off-2     | T                                  | C | C | C | T | C | A | A | A | G  | A  | A  | C  | C  | T  | T  | G  | A  | G  | G   | A  | G  | T                               | Chr19 (-6105951)            | No |
| On             | <b>gCesA7A/B-1</b> | A                                  | C | G | C | A | A | A | G | A | A  | A  | G  | A  | G  | G  | G  | A  | G  | G  | G   | T  | G  | G                               | <b>PtrCesA7A</b>            | -  |
|                |                    | A                                  | C | G | A | A | A | A | G | A | A  | A  | G  | A  | G  | G  | G  | A  | G  | G  | G   | T  | G  | G                               | <b>PtrCesA7B</b>            | -  |
| Off            | gCesA7A/B-1-off-1  | A                                  | C | A | A | A | A | A | A | A | A  | G  | A  | G  | G  | G  | A  | G  | G  | G  | A   | G  | G  | Potri.004G210200                | No                          |    |
|                | gCesA7A/B-1-off-2  | A                                  | G | A | G | A | A | A | G | A | A  | A  | G  | A  | G  | G  | G  | A  | G  | G  | G   | A  | G  | G                               | Potri.001G314000            | No |
|                | gCesA7A/B-1-off-3  | G                                  | A | G | A | A | G | A | G | A | A  | A  | G  | A  | G  | G  | G  | A  | G  | G  | G   | A  | G  | G                               | Potri.011G084300            | No |
|                | gCesA7A/B-1-off-4  | A                                  | A | A | A | A | G | A | G | A | A  | A  | G  | A  | G  | G  | G  | A  | G  | G  | G   | A  | G  | G                               | Chr01(-21435525)            | No |
|                | gCesA7A/B-1-off-5  | A                                  | T | G | A | G | A | A | G | A | A  | A  | G  | A  | G  | G  | G  | A  | G  | G  | G   | A  | G  | G                               | Potri.003G046500            | No |
|                | gCesA7A/B-1-off-6  | A                                  | C | G | C | A | A | G | G | A | G  | A  | G  | A  | G  | G  | G  | A  | G  | G  | G   | T  | G  | A                               | Chr18 (-6513265)            | No |
| On             | <b>gCesA7A/B-2</b> | C                                  | C | A | G | G | T | T | C | A | G  | A  | A  | A  | C  | T  | G  | G  | A  | T  | A   | T  | G  | G                               | <b>PtrCesA7A</b>            | -  |
|                |                    | C                                  | C | A | G | G | T | T | C | A | G  | A  | A  | A  | C  | T  | G  | G  | A  | T  | A   | T  | G  | G                               | <b>PtrCesA7B</b>            | -  |
| Off            | gCesA7A/B-2-off-1  | T                                  | G | A | T | G | T | T | C | T | T  | A  | A  | A  | C  | T  | G  | G  | A  | T  | A   | T  | G  | G                               | Chr17 (+506091)             | No |
|                | gCesA7A/B-2-off-2  | T                                  | G | C | A | G | A | T | C | A | G  | A  | A  | A  | C  | T  | G  | G  | A  | T  | A   | G  | G  | G                               | Potri.008G190100            | No |
| On             | <b>gCesA7A/B-3</b> | T                                  | T | T | T | G | T | G | A | C | T  | T  | C  | A  | A  | C  | T  | T  | T  | A  | A   | T  | G  | G                               | <b>PtrCesA7A</b>            | -  |
|                |                    | T                                  | T | T | T | G | T | G | A | C | T  | T  | C  | A  | A  | C  | T  | T  | T  | A  | A   | T  | G  | G                               | <b>PtrCesA7B</b>            | -  |

|     |                   |                                    |   |   |   |   |   |   |   |   |   |   |   |   |   |   |   |   |   |   |   |   |   |                  |                  |    |
|-----|-------------------|------------------------------------|---|---|---|---|---|---|---|---|---|---|---|---|---|---|---|---|---|---|---|---|---|------------------|------------------|----|
| Off | gCesA7A/B-3-off-1 | T                                  | G | T | T | C | T | G | A | C | T | T | C | A | A | C | T | T | T | A | A | A | G | G                | Chr05(-12012362) | No |
|     | gCesA7A/B-3-off-2 | A                                  | C | G | T | G | T | C | A | C | T | T | A | A | A | C | T | T | T | A | A | T | G | G                | Scaffold_696     | No |
|     | gCesA7A/B-3-off-3 | A                                  | C | A | C | G | T | C | A | C | T | T | A | A | A | C | T | T | T | A | A | T | G | G                | Chr12 (-5722266) | No |
|     | gCesA7A/B-3-off-4 | A                                  | T | C | A | A | T | G | A | G | T | T | C | A | A | C | T | T | T | A | A | T | G | G                | Chr12 (-5867397) | No |
| On  | gCesA7A/B-4       | G                                  | C | C | G | C | T | G | G | A | C | T | C | G | A | G | G | A | A | G | G | A | G | G                | PtrCesA7A        | -  |
|     |                   | G                                  | C | T | G | C | C | G | G | A | C | T | C | G | A | G | G | A | A | G | G | A | G | G                | PtrCesA7B        | -  |
| Off | gCesA7A/B-4-off-1 | A                                  | G | A | C | A | T | G | G | A | C | T | C | G | A | G | G | A | A | G | G | A | G | G                | Potri.014G036100 | No |
| On  | gCesA8A/B-1       | A                                  | G | T | T | C | C | G | C | C | G | G | A | A | C | A | G | C | A | G | A | T | G | G                | PtrCesA8A        | -  |
|     |                   | A                                  | G | T | T | C | C | G | C | C | G | G | A | A | C | A | G | C | A | G | A | T | G | G                | PtrCesA8B        | -  |
| Off | -                 | NO off-target homologous sequences |   |   |   |   |   |   |   |   |   |   |   |   |   |   |   |   |   |   |   | - | - | -                |                  |    |
| On  | gCesA8A/B-2       | C                                  | A | G | G | A | T | T | T | G | T | T | A | T | T | C | T | G | T | A | G | T | G | G                | PtrCesA8A        | -  |
|     |                   | C                                  | A | G | G | A | T | T | T | G | T | T | A | T | T | C | T | G | T | A | G | T | G | G                | PtrCesA8B        | -  |
| Off | gCesA8A/B-2-off-1 | C                                  | A | G | G | A | T | T | T | G | T | T | A | T | T | C | G | G | T | A | G | T | G | C                | Potri.001G266400 | No |
|     | gCesA8A/B-2-off-2 | G                                  | G | T | C | A | T | T | T | G | G | A | A | T | T | C | T | G | T | A | G | T | G | G                | Potri.001G456800 | No |
| On  | gCesA8A/B-3       | G                                  | A | A | C | T | G | G | T | T | G | T | G | T | T | T | C | A | A | T | A | G | G | PtrCesA8A        | -                |    |
|     |                   | G                                  | A | A | C | T | G | G | T | T | G | T | G | T | T | T | C | A | A | T | A | G | G | PtrCesA8B        | -                |    |
| Off | gCesA8A/B-3-off-1 | G                                  | A | A | C | T | G | G | T | T | G | T | C | T | A | T | T | C | A | T | T | A | G | G                | Chr06 (+1623375) | No |
|     | gCesA8A/B-3-off-2 | A                                  | A | C | C | T | G | G | T | T | G | T | G | T | T | G | C | A | T | T | A | G | G | Chr17(-10225639) | No               |    |
|     | gCesA8A/B-3-off-3 | T                                  | A | T | G | T | G | G | T | T | G | T | G | T | T | T | C | C | A | A | A | G | G | Potri.011G116200 | No               |    |
|     | gCesA8A/B-3-off-4 | G                                  | A | G | C | T | G | G | T | T | G | T | G | T | T | T | A | A | A | A | A | G | A | Potri.004G147800 | No               |    |
| On  | gCesA8A/B-4       | C                                  | A | T | A | C | A | T | C | T | C | G | A | C | C | T | A | C | T | T | G | T | G | G                | PtrCesA8A        | -  |
|     |                   | C                                  | A | T | A | C | A | T | C | T | C | G | A | C | C | T | A | C | T | T | G | T | G | G                | PtrCesA8B        | -  |
| Off | -                 | NO off-target homologous sequences |   |   |   |   |   |   |   |   |   |   |   |   |   |   |   |   |   |   |   | - | - | -                |                  |    |

Nucleotides in green shading are the same with the designed gRNAs target sites and mismatched nucleotides are without shading. The PAM regions are highlighted in red shading. Potential off-target sites in protein coding gene regions are annotated with gene ID and the others located in noncoding regions are detailed with position information on chromosomes.

**Number of plasmids containing  
the cloned PCR products**

**gCesA4-1-off-1**

WT **GTGAGGAG**GCTTATGCATTGTGG (×10)  
*ptrcesa4-1*# GTGAGGAGGCTTATGCATTGTGG (×15)  
*ptrcesa4-4*# GTGAGGAGGCTTATGCATTGTGG (×15)

**gCesA4-1-off-2**

WT **TGAGG**GATGCTTATGCT**TTGTGG** (×10)  
*ptrcesa4-1#* TGAGGGATGCTTATGCTTT**GTGG** (×15)  
*ptrcesa4-4#* TGAGGGATGCTTATGCTTT**GTGG** (×15)

**gCesA4-3-off-1**

WT **AAGA**TGT**TTG**AGAACTTCGAT**GG** (×10)  
*ptrcesa4-6#* AAGATGTTT**GAGA**ACTTCGAT**GG** (×15)

**gCesA4-3-off-2**

WT **TTAAGC**TGTTAGAACTTCG**ACGG** (×10)  
*ptrcesa4-6#* TTAAGCTGTTAGAACTTCG**ACGG** (×15)

**gCesA4-4-off-1**

WT **CCACCTCAAGGTCCTCGGACAGA** (×10)  
*ptrcesa4-6#* **CCACCTCAAGGTCCTCGGACAGA** (×15)

**gCesA4-4-off-2**

WT **ACTCCTCAAGGTCTTTGAGGGA** (×10)  
*ptrcesa4-6#* **ACTCCTCAAGGTCTTTGAGGGA** (×15)

**gCesA7A/B-1-off-1**

WT AC**AA**AAA**A**AAAGAGGGAGGG**AGG** (×10)  
*ptrcesa7ab-3#* AC**AAAAAAAAA**AGAGGGAGGG**AGG** (×15)

**gCesA7A/B-1-off-2**

WT A**GAG**AAAGAAAGAGGGAGGG**AGG** (×10)  
*ptrcesa7ab-3#* A**GAG**AAAGAAAGAGGGAGGG**AGG** (×15)

**gCesA7A/B-1-off-3**

WT **GAGA**A**G**AGAAAGAGGGAGGG**AGG** (×10)  
*ptrcesa7ab-3#* **GAGA**A**G**AGAAAGAGGGAGGG**AGG** (×15)

**gCesA7A/B-1-off-4**

WT **AAAA**A**G**AGAAAGAGGGAGGG**AGG** (×10)  
*ptrcesa7ab-3#* **AAAA**A**G**AGAAAGAGGGAGGG**AGG** (×15)

**gCesA7A/B-1-off-5**

WT A**TGAG**AAGAAAGAGGGAGGG**AGG** (×10)  
*ptrcesa7ab-3#* A**TGAG**AAGAAAGAGGGAGGG**AGG** (×15)

**gCesA7A/B-1-off-6**

WT ACGCA**AGGAG**AGAGGGAGGG**TGA** (×6)

*ptrcesa7ab-3#* ATGCAAGGAGAGAGGGAGGGTGA (×4) SNP  
ACGCAAGGAGAGAGGGAGGGTGA (×7)  
ATGCAAGGAGAGAGGGAGGGTGA (×8)

**gCesA7A/B-2-off-1**

WT CCATATCCAGTTTAAAGAACATCA (×10)  
*ptrcesa7ab-3#* CCATATCCAGTTTAAGAACATCA (×15)

**gCesA7A/B-2-off-2**

WT CCTATCCAGTTTCTGATCTGCA (×10)  
*ptrcesa7ab-3#* CCTATCCAGTTTCTGATCTGCA (×15)

**gCesA7A/B-3-off-1**

WT TGTTCTGACTTCAACTTTAAAGG (×10)  
*ptrcesa7ab-7#* TGTTCTGACTTCAACTTTAAAGG (×15)  
*ptrcesa7ab-13#* TGTTCTGACTTCAACTTTAAAGG (×15)

**gCesA7A/B-3-off-2**

WT ACGTGTCACTTAAACTTTAATGG (×10)  
*ptrcesa7ab-7#* ACGTGTCACTTAAACTTTAATGG (×15)  
*ptrcesa7ab-13#* ACGTGTCACTTAAACTTTAATGG (×15)

**gCesA7A/B-3-off-3**

WT ACACGTCACTTAAACTTTAATGG (×10)  
*ptrcesa7ab-7#* ACACGTCACTTAAACTTTAATGG (×15)  
*ptrcesa7ab-13#* ACACGTCACTTAAACTTTAATGG (×15)

**gCesA7A/B-3-off-4**

WT ATCAAATGAGTTCAACTTTAATGG (×10)  
*ptrcesa7ab-7#* ATCAAATGAGTTCAACTTTAATGG (×15)  
*ptrcesa7ab-13#* ATCAAATGAGTTCAACTTTAATGG (×15)

**gCesA7A/B-4-off-1**

WT CCTCCTTCCTCGAGTCCA TGTCT (×10)  
*ptrcesa7ab-7#* CCTCCTTCCTCGAGTCCATGTCT (×15)  
*ptrcesa7ab-13#* CCTCCTTCCTCGAGTCCATGTCT (×15)

**gCesA8A/B-2-off-1**

WT GCACTACCGAATAACAAATCCTG (×10)  
*ptrcesa8ab-1#* GCACTACCGAATAACAAATCCTG (×15)

**gCesA8A/B-2-off-2**



WT CCACTACAGAATT**TC**CAAAT**GACC** (×10)  
*ptrcesa8ab-1#* CCACTACAGAATTCCAAATGACC (×15)

**gCesA8A/B-3-off-1**

WT GAACTGGTTGT**CT**ATT**CA**T**T**AGG (×5)  
GAACTGGTTGT**CT**ATT**CA**T**C**AGG (×5) SNP  
*ptrcesa8ab-4#* GAACTGGTTGTCTATT**CA**T**T**AGG (×7)  
GAACTGGTTGTCTATT**CA**T**C**AGG (×8)  
*ptrcesa8ab-8#* GAACTGGTTGTCTATT**CA**T**T**AGG (×8)  
GAACTGGTTGTCTATT**CA**T**C**AGG (×7)

**gCesA8A/B-3-off-2**

WT **AA**CCTGGTTGTGTTT**G**CA**T**TAGG (×10)  
*ptrcesa8ab-4#* AACCTGGTTGTGTTTGCATTAGG (×15)  
*ptrcesa8ab-8#* AACCTGGTTGTGTTTGCATTAGG (×15)

**gCesA8A/B-3-off-3**

WT **TAT**GTGGTTGTGTTT**CCAA**AGG (×5)  
**TAT**GTG**ATT**GTGTTT**CCAA**ACG (×5) SNP  
*ptrcesa8ab-4#* TATGTGGTTGTGTTTCCAAAGG (×7)  
TATGTG**ATT**GTGTTTCCAA**ACG** (×8)  
*ptrcesa8ab-8#* TATGTGGTTGTGTTTCCAAAGG (×6)  
TATGTG**ATT**GTGTTTCCAA**ACG** (×9)

**gCesA8A/B-3-off-4**

WT GAG**G**CTGGTTGTGTTT**AAAA**AGA (×10)  
*ptrcesa8ab-4#* GAGCTGGTTGTGTTTAAAAAGA (×15)  
*ptrcesa8ab-8#* GAGCTGGTTGTGTTTAAAAAGA (×15)

**Table S7** Inheritance of the Cas9/gRNA-induced mutations in progenies of *ptrcesa4*, *7a/b* and *8a/b* mutants through asexual propagation methods. The progenies did change in the edited sites of *PtrCesA4*, *7A/B* or *8A/B*, in which was labeled with empty box and brilliant yellow color.

| Line (#)           |      | gCesA4-1<br>Target seq: CATACGATGCTTATGCATTG <u>TGG</u>                                                                                          | Mutation types<br>(Number of plasmids containing the cloned PCR products) |              | gCesA4-2<br>Target seq: <u>CCC</u> ATTCGTCGGCCTTTTCGTC                                            | Mutation types<br>(Number of plasmids containing the cloned PCR products) |           |
|--------------------|------|--------------------------------------------------------------------------------------------------------------------------------------------------|---------------------------------------------------------------------------|--------------|---------------------------------------------------------------------------------------------------|---------------------------------------------------------------------------|-----------|
| <i>ptrcesa4-2#</i> |      | TCCAGCATAACGATGCTTATGC - TTG <u>TGG</u> CCTTAT<br>TCCAGCATAACGATGCTTATGCATTG <u>TGG</u> CCTTAT                                                   | -1 (×17)<br>0 (×8)                                                        | heterozygous | TGCAC <u>CCC</u> ATT c CGTCCGGCCTTTTCGTCAGCAG<br>TGCAC <u>CCC</u> ATT t CGTCCGGCCTTTTCGTCAGCAG    | +1 (×15)<br>+1 (×10)                                                      | biallelic |
| Apical bud         | T0   | TCCAGCATAACGATGCTTATGC - TTG <u>TGG</u> CCTTAT<br>TCCAGCATAACGATGCTTATGCATTG <u>TGG</u> CCTTAT                                                   | -1 (×7)<br>0 (×18)                                                        | heterozygous | TGCAC <u>CCC</u> ATT c CGTCCGGCCTTTTCGTCAGCAG<br>TGCAC <u>CCC</u> ATT t CGTCCGGCCTTTTCGTCAGCAG    | +1 (×11)<br>+1 (×14)                                                      | biallelic |
| Axillary bud       | T1-1 | TCCAGCATAACGATGCTTATGC - TTG <u>TGG</u> CCTTAT<br>TCCAGCATAACGATGCTTATGCATTG <u>TGG</u> CCTTAT                                                   | -1 (×11)<br>0 (×14)                                                       | heterozygous | TGCAC <u>CCC</u> ATT c CGTCCGGCCTTTTCGTCAGCAG<br>TGCAC <u>CCC</u> ATT t CGTCCGGCCTTTTCGTCAGCAG    | +1 (×11)<br>+1 (×14)                                                      | biallelic |
|                    | T1-2 | TCCAGCATAACGATGCTTATGC - TTG <u>TGG</u> CCTTAT<br>TCCAGCATAACGATGCTTATGCATTG <u>TGG</u> CCTTAT                                                   | -1 (×13)<br>0 (×12)                                                       | heterozygous | TGCAC <u>CCC</u> ATT c CGTCCGGCCTTTTCGTCAGCAG<br>TGCAC <u>CCC</u> ATT t CGTCCGGCCTTTTCGTCAGCAG    | +1 (×15)<br>+1 (×10)                                                      | biallelic |
|                    | T2-1 | TCCAGCATAACGATGCTTATGC - TTG <u>TGG</u> CCTTAT<br>TCCAGCATAACGATGCTTATGCATTG <u>TGG</u> CCTTAT                                                   | -1 (×16)<br>0 (×9)                                                        | heterozygous | TGCAC <u>CCC</u> ATT c CGTCCGGCCTTTTCGTCAGCAG<br>TGCAC <u>CCC</u> ATT t CGTCCGGCCTTTTCGTCAGCAG    | +1 (×12)<br>+1 (×13)                                                      | biallelic |
|                    | T2-2 | TCCAGCATAACGATGCTTATGC - TTG <u>TGG</u> CCTTAT<br>TCCAGCATAACGATGCTTATGCATTG <u>TGG</u> CCTTAT                                                   | -1 (×17)<br>0 (×8)                                                        | heterozygous | TGCAC <u>CCC</u> ATT c CGTCCGGCCTTTTCGTCAGCAG<br>TGCAC <u>CCC</u> ATT t CGTCCGGCCTTTTCGTCAGCAG    | +1 (×10)<br>+1 (×15)                                                      | biallelic |
| Shoot regeneration | T1-1 | TCCAGCATAACGATGCTTATGC - TTG <u>TGG</u> CCTTAT<br>TCCAGCATAACGATGCTTATGCATTG <u>TGG</u> CCTTAT<br>TCCAGCATAACGATGCTTATGC - TTG <u>TGG</u> CCTTAT | -1 (×14)<br>0 (×9)<br>-1 (×2)                                             | chimeric     | TGCAC <u>CCC</u> ATT c CGTCCGGCCTTTTCGTCAGCAG<br>TGCAC <u>CCC</u> ATT t CGTCCGGCCTTTTCGTCAGCAG    | +1 (×12)<br>+1 (×13)                                                      | biallelic |
|                    | T1-2 | TCCAGCATAACGATGCTTATGC - TTG <u>TGG</u> CCTTAT<br>TCCAGCATAACGATGCTTATGCATTG <u>TGG</u> CCTTAT                                                   | -1 (×10)<br>0 (×15)                                                       | heterozygous | TGCAC <u>CCC</u> ATT c CGTCCGGCCTTTTCGTCAGCAG<br>TGCAC <u>CCC</u> ATT t - - - - GCCTTTTCGTC AGCAG | +1 (×10)<br>+1.5 (×15)                                                    | biallelic |
|                    | T1-3 | TCCAGCATAACGATGCTTATGC - TTG <u>TGG</u> CCTTAT<br>TCCAGCATAACGATGCTTATGCATTG <u>TGG</u> CCTTAT                                                   | -1 (×18)<br>0 (×7)                                                        | heterozygous | TGCAC <u>CCC</u> ATT c CGTCCGGCCTTTTCGTCAGCAG<br>TGCAC <u>CCC</u> ATT t CGTCCGGCCTTTTCGTCAGCAG    | +1 (×13)<br>+1 (×12)                                                      | biallelic |
| Line (#)           |      | gCesA4-3<br>Target seq: CATCTGTGTTAGAACTTCGAT <u>TGG</u>                                                                                         | Mutation types<br>(Number of plasmids containing the cloned PCR products) |              | gCesA4-4<br>Target seq: CCTCAAGGTCCTTGGAGGAG                                                      | Mutation types<br>(Number of plasmids containing the cloned PCR products) |           |
| <i>ptrcesa4-5#</i> |      | AGCAACATCTGTGTTAGAA - - - CGAT <u>TGG</u> AGTG<br>AGCAACATCTGTGTTAGAAC - - CGAT <u>TGG</u> AGTG                                                  | -3 (×13)<br>-2 (×12)                                                      | biallelic    | CAAGG <u>CCT</u> CCTCAAGGTCCTTGGAGGAGTAGAC                                                        | 0 (×25)                                                                   | WT        |
| Apical bud         | T0   | AGCAACATCTGTGTTAGAA - - - CGAT <u>TGG</u> AGTG<br>AGCAACATCTGTGTTAGAAC - - CGAT <u>TGG</u> AGTG                                                  | -3 (×15)<br>-2 (×10)                                                      | biallelic    | CAAGG <u>CCT</u> CCTCAAGGTCCTTGGAGGAGTAGAC                                                        | 0 (×25)                                                                   | WT        |
| Axillary bud       | T1-1 | AGCAACATCTGTGTTAGAA - - - CGAT <u>TGG</u> AGTG<br>AGCAACATCTGTGTTAGAAC - - CGAT <u>TGG</u> AGTG                                                  | -3 (×11)<br>-2 (×14)                                                      | biallelic    | CAAGG <u>CCT</u> CCTCAAGGTCCTTGGAGGAGTAGAC                                                        | 0 (×25)                                                                   | WT        |

|                            |                                                                                 |                                                                          |                                                                           |                                                                                |                                                                                 |                                                                           |           |
|----------------------------|---------------------------------------------------------------------------------|--------------------------------------------------------------------------|---------------------------------------------------------------------------|--------------------------------------------------------------------------------|---------------------------------------------------------------------------------|---------------------------------------------------------------------------|-----------|
|                            | T1-2                                                                            | AGCAACATCTGTGTTAGAA --- CGATGGAGTG<br>AGCAACATCTGTGTTAGAAC -- CGATGGAGTG | -3 (×9)<br>-2 (×16)                                                       | biallelic                                                                      | CAAGGCCTCCTCAAGGTCCTTGAGGAGTAGAC                                                | 0 (×25)                                                                   | WT        |
|                            | T2-1                                                                            | AGCAACATCTGTGTTAGAA --- CGATGGAGTG<br>AGCAACATCTGTGTTAGAAC -- CGATGGAGTG | -3 (×10)<br>-2 (×15)                                                      | biallelic                                                                      | CAAGGCCTCCTCAAGGTCCTTGAGGAGTAGAC                                                | 0 (×25)                                                                   | WT        |
|                            | T2-2                                                                            | AGCAACATCTGTGTTAGAA --- CGATGGAGTG<br>AGCAACATCTGTGTTAGAAC -- CGATGGAGTG | -3 (×12)<br>-2 (×13)                                                      | biallelic                                                                      | CAAGGCCTCCTCAAGGTCCTTGAGGAGTAGAC                                                | 0 (×25)                                                                   | WT        |
| Shoot regeneration         | T1-1                                                                            | AGCAACATCTGTGTTAGAA --- CGATGGAGTG<br>AGCAACATCTGTGTTAGAAC -- CGATGGAGTG | -3 (×12)<br>-2 (×13)                                                      | biallelic                                                                      | CAAGGCCTCCTCAAGGTCCTTGAGGAGTAGAC                                                | 0 (×25)                                                                   | WT        |
|                            | T1-2                                                                            | AGCAACATCTGTGTTAGAA --- CGATGGAGTG<br>AGCAACATCTGTGTTAGAAC -- CGATGGAGTG | -3 (×16)<br>-2 (×9)                                                       | biallelic                                                                      | CAAGGCCTCCTCAAGGTCCTTGAGGAGTAGAC                                                | 0 (×25)                                                                   | WT        |
|                            | T1-3                                                                            | AGCAACATCTGTGTTAGAA --- CGATGGAGTG<br>AGCAACATCTGTGTTAGAAC -- CGATGGAGTG | -3 (×17)<br>-2 (×8)                                                       | biallelic                                                                      | CAAGGCCTCCTCAAGGTCCTTGAGGAGTAGAC                                                | 0 (×25)                                                                   | WT        |
| Line (#)                   | gCesA7A/B-3<br>CesA7A, TTTGTGACTTCAACTTTAATGG<br>CesA7B, TTTGTGACTTCAACTTTAATGG |                                                                          | Mutation types<br>(Number of plasmids containing the cloned PCR products) | gCesA7A/B-4<br>CesA7A, CCTCCTCCTCGAGTCCAGCGGC<br>CesA7B, CCTCCTCCTCGAGTCCGCAGC |                                                                                 | Mutation types<br>(Number of plasmids containing the cloned PCR products) |           |
| <i>ptrcesa7ab-5#-7A-7B</i> |                                                                                 | GCAATTTTGTGACTTCAACTTTAATGG AAGAA                                        | 0 (×25)                                                                   | WT                                                                             | GCGTACCTCCT - - - - CGAGTCCAGCGGCTCTGC<br>GCGTACC - - - TTCCTCGAGTCCAGCGGCTCTGC | -4 (×16)<br>-3 (×9)                                                       | biallelic |
|                            |                                                                                 | GCAATTTTGTGACTTCAACTTTAATGG AAGAA                                        | 0 (×25)                                                                   | WT                                                                             | GTGTACCTCCT † TCCTCGAGTCCGGCAGCTCTGC<br>GTGTACCTCCT - CCTCGAGTCCGGCAGCTCTGC     | +1 (×15)<br>-1 (×10)                                                      | biallelic |
| Apical bud                 | T0-7A-7B                                                                        | GCAATTTTGTGACTTCAACTTTAATGG AAGAA                                        | 0 (×25)                                                                   | WT                                                                             | GCGTACCTCCT - - - - CGAGTCCAGCGGCTCTGC<br>GCGTACC - - - TTCCTCGAGTCCAGCGGCTCTGC | -4 (×9)<br>-3 (×16)                                                       | biallelic |
|                            |                                                                                 | GCAATTTTGTGACTTCAACTTTAATGG AAGAA                                        | 0 (×25)                                                                   | WT                                                                             | GTGTACCTCCT † TCCTCGAGTCCGGCAGCTCTGC<br>GTGTACCTCCT - CCTCGAGTCCGGCAGCTCTGC     | +1 (×11)<br>-1 (×14)                                                      | biallelic |
| Axillary bud               | T1-1-7A                                                                         | GCAATTTTGTGACTTCAACTTTAATGG AAGAA                                        | 0 (×25)                                                                   | WT                                                                             | GCGTACCTCCT - - - - CGAGTCCAGCGGCTCTGC<br>GCGTACC - - - TTCCTCGAGTCCAGCGGCTCTGC | -4 (×14)<br>-3 (×11)                                                      | biallelic |
|                            | -7B                                                                             | GCAATTTTGTGACTTCAACTTTAATGG AAGAA                                        | 0 (×25)                                                                   | WT                                                                             | GTGTACCTCCT † TCCTCGAGTCCGGCAGCTCTGC<br>GTGTACCTCCT - CCTCGAGTCCGGCAGCTCTGC     | +1 (×13)<br>-1 (×12)                                                      | biallelic |
|                            | T1-2-7A                                                                         | GCAATTTTGTGACTTCAACTTTAATGG AAGAA                                        | 0 (×25)                                                                   | WT                                                                             | GCGTACCTCCT - - - - CGAGTCCAGCGGCTCTGC<br>GCGTACC - - - TTCCTCGAGTCCAGCGGCTCTGC | -4 (×13)<br>-3 (×12)                                                      | biallelic |
|                            | -7B                                                                             | GCAATTTTGTGACTTCAACTTTAATGG AAGAA                                        | 0 (×25)                                                                   | WT                                                                             | GTGTACCTCCT † TCCTCGAGTCCGGCAGCTCTGC<br>GTGTACCTCCT - CCTCGAGTCCGGCAGCTCTGC     | +1 (×12)<br>-1 (×13)                                                      | biallelic |
|                            | T2-1-7A                                                                         | GCAATTTTGTGACTTCAACTTTAATGG AAGAA                                        | 0 (×25)                                                                   | WT                                                                             | GCGTACCTCCT - - - - CGAGTCCAGCGGCTCTGC<br>GCGTACC - - - TTCCTCGAGTCCAGCGGCTCTGC | -4 (×10)<br>-3 (×15)                                                      | biallelic |
|                            | -7B                                                                             | GCAATTTTGTGACTTCAACTTTAATGG AAGAA                                        | 0 (×25)                                                                   | WT                                                                             | GTGTACCTCCT † TCCTCGAGTCCGGCAGCTCTGC<br>GTGTACCTCCT - CCTCGAGTCCGGCAGCTCTGC     | +1 (×14)<br>-1 (×11)                                                      | biallelic |
|                            | T2-2-7A                                                                         | GCAATTTTGTGACTTCAACTTTAATGG AAGAA                                        | 0 (×25)                                                                   | WT                                                                             | GCGTACCTCCT - - - - CGAGTCCAGCGGCTCTGC<br>GCGTACC - - - TTCCTCGAGTCCAGCGGCTCTGC | -4 (×16)<br>-3 (×9)                                                       | biallelic |

|                            |            |                                                                                                                      |         |                                                                                  |                                                                                                                                            |                                 |                                                                                  |
|----------------------------|------------|----------------------------------------------------------------------------------------------------------------------|---------|----------------------------------------------------------------------------------|--------------------------------------------------------------------------------------------------------------------------------------------|---------------------------------|----------------------------------------------------------------------------------|
|                            | -7B        | GCAATTTTTGTGACTTCAACTTTAAT <u>TGGAAGAA</u>                                                                           | 0 (×25) | WT                                                                               | GTGTAC <u>CT</u> CCT † TCCTCGAGTCCGGCAGCTCTGC<br>GTGTAC <u>CT</u> CCT - CCTCGAGTCCGGCAGCTCTGC                                              | +1 (×12)<br>-1 (×13)            | biallelic                                                                        |
| <b>Shoot regeneration</b>  | T1-1-7A-7B | GCAATTTTTGTGACTTCAACTTTAAT <u>TGGAAGAA</u>                                                                           | 0 (×25) | WT                                                                               | GCGTAC <u>CT</u> CCT - - - - CGAGTCCAGCGGCTCTGC<br>GCGTAC <u>C</u> - - - TTCCTCGAGTCCAGCGGCTCTGC                                           | -4 (×10)<br>-3 (×15)            | biallelic                                                                        |
|                            |            | GCAATTTTTGTGACTTCAACTTTAAT <u>TGGAAGAA</u>                                                                           | 0 (×25) | WT                                                                               | GTGTAC <u>CT</u> CCT † TCCTCGAGTCCGGCAGCTCTGC<br>GTGTAC <u>CT</u> CCT - CCTCGAGTCCGGCAGCTCTGC                                              | +1 (×13)<br>-1 (×12)            | biallelic                                                                        |
|                            | T1-2-7A-7B | GCAATTTTTGTGACTTCAACTTTAAT <u>TGGAAGAA</u>                                                                           | 0 (×25) | WT                                                                               | GCGTAC <u>CT</u> CCT - - - - CGAGTCCAGCGGCTCTGC<br>GCGTAC <u>C</u> - - - TTCCTCGAGTCCAGCGGCTCTGC                                           | -4 (×14)<br>-3 (×11)            | biallelic                                                                        |
|                            |            | GCAATTTTTGTGACTTCAACTTTAAT <u>TGGAAGAA</u>                                                                           | 0 (×25) | WT                                                                               | GTGTAC <u>CT</u> CCT † TCCTCGAGTCCGGCAGCTCTGC<br>GTGTAC <u>CT</u> CCT - CCTCGAGTCCGGCAGCTCTGC                                              | +1 (×12)<br>-1 (×13)            | biallelic                                                                        |
|                            | T1-3-7A-7B | GCAATTTTTGTGACTTCAACTTTAAT <u>TGGAAGAA</u>                                                                           | 0 (×25) | WT                                                                               | GCGTAC <u>CT</u> CCT - - - - CGAGTCCAGCGGCTCTGC<br>GCGTAC <u>C</u> - - - TTCCTCGAGTCCAGCGGCTCTGC                                           | -4 (×14)<br>-3 (×11)            | biallelic                                                                        |
|                            |            | GCAATTTTTGTGACTTCAACTTTAAT <u>TGGAAGAA</u>                                                                           | 0 (×25) | WT                                                                               | GTGTAC <u>CT</u> CCT † TCCTCGAGTCCGGCAGCTCTGC<br>GTGTAC <u>CT</u> CCT - CCTCGAGTCCGGCAGCTCTGC                                              | +1 (×12)<br>-1 (×13)            | biallelic                                                                        |
| <b>Line#</b>               |            | <b>gCesA7A/B-3</b><br>CesA7A, TTTTGTGACTTCAACTTTAAT <u>TGGAAGAA</u><br>CesA7B, TTTTGTGACTTCAACTTTAAT <u>TGGAAGAA</u> |         | <b>Mutation types</b><br>(Number of plasmids containing the cloned PCR products) | <b>gCesA7A/B-4</b><br>CesA7A, <u>CTC</u> CTTCCTCGAGTCCAGCGGC<br>CesA7B, <u>CTC</u> CTTCCTCGAGTCCGGCAGC                                     |                                 | <b>Mutation types</b><br>(Number of plasmids containing the cloned PCR products) |
| <i>ptrcesa7ab-6#-7A-7B</i> |            | GCAATTTTTGTGACTTCAACTTTAAT <u>TGGAAGAA</u>                                                                           | 0 (×25) | WT                                                                               | GCGTAC <u>CT</u> CCT - CCTCGAGTCCAGCGGCTCTG<br>GCGTAC <u>CT</u> C - - - - - GAGTCCAGCGGCTCTG<br>GCGTAC <u>CT</u> CCTCCTCGAGTCCAGCGGCTCTG   | -1 (×13)<br>-7 (×9)<br>0 (×3)   | chimeric                                                                         |
|                            |            | GCAATTTTTGTGACTTCAACTTTAAT <u>TGGAAGAA</u>                                                                           | 0 (×25) | WT                                                                               | GTGTAC <u>CT</u> CCTa TCCTCGAGTCCGGCAGCTCTG<br>GT - - - - - CCTCGAGTCCGGCAGCTCTG<br>GTGTAC <u>CT</u> CCTCCTCGAGTCCGGCAGCTCTG               | +1 (×9)<br>-10 (×12)<br>0 (×4)  | chimeric                                                                         |
| <b>Apical bud</b>          | T0-7A-7B   | GCAATTTTTGTGACTTCAACTTTAAT <u>TGGAAGAA</u>                                                                           | 0 (×25) | WT                                                                               | GCGTAC <u>CT</u> CCT - CCTCGAGTCCAGCGGCTCTG<br>GCGTAC <u>CT</u> C - - - - - GAGTCCAGCGGCTCTG<br>GCGTAC <u>CT</u> CCTCCTCGAGTCCAGCGGCTCTG   | -1 (×12)<br>-7 (×8)<br>0 (×5)   | chimeric                                                                         |
|                            |            | GCAATTTTTGTGACTTCAACTTTAAT <u>TGGAAGAA</u>                                                                           | 0 (×25) | WT                                                                               | GTGTAC <u>CT</u> CCTa TCCTCGAGTCCGGCAGCTCTG<br>GT - - - - - CCTCGAGTCCGGCAGCTCTG<br>GTGTAC <u>CT</u> CCTCCTCGAGTCCGGCAGCTCTG               | +1 (×9)<br>-10 (×10)<br>0 (×6)  | chimeric                                                                         |
| <b>Axillary bud</b>        | T1-1-7A-7B | GCAATTTTTGTGACTTCAACTTTAAT <u>TGGAAGAA</u>                                                                           | 0 (×25) | WT                                                                               | GCGTAC <u>CT</u> CCT- CCTCGAGTCCAGCGGCTCTGC<br>GCGTAC <u>CT</u> C - - - - - GAGTCCAGCGGCTCTGC<br>GCGTAC <u>CT</u> CCTCCTCGAGTCCAGCGGCTCTGC | -1 (×13)<br>-7 (×8)<br>0 (×4)   | chimeric                                                                         |
|                            |            | GCAATTTTTGTGACTTCAACTTTAAT <u>TGGAAGAA</u>                                                                           | 0 (×25) | WT                                                                               | GTGTAC <u>CT</u> CCTa TCCTCGAGTCCGGCAGCTCTG<br>GT - - - - - CCTCGAGTCCGGCAGCTCTG<br>GTGTAC <u>CT</u> CCTCCTCGAGTCCGGCAGCTCTG               | +1 (×11)<br>-10 (×10)<br>0 (×4) | chimeric                                                                         |
|                            | T1-2-      | GCAATTTTTGTGACTTCAACTTTAAT <u>TGGAAGAA</u>                                                                           | 0 (×25) | WT                                                                               | GCGTAC <u>CT</u> CCT - CCTCGAGTCCAGCGGCTCTG                                                                                                | -1 (×10)                        | chimeric                                                                         |

|                           |                                                                                                         |                                                                              |                                                                                 |                  |                                                                                                              |                                            |                                                                                 |          |
|---------------------------|---------------------------------------------------------------------------------------------------------|------------------------------------------------------------------------------|---------------------------------------------------------------------------------|------------------|--------------------------------------------------------------------------------------------------------------|--------------------------------------------|---------------------------------------------------------------------------------|----------|
|                           | 7A<br>-7B                                                                                               |                                                                              |                                                                                 |                  | GCGTACCTC ----- GAGTCCAGCGGCTCTGC<br>GCGTACCTCCTTCCTCGAGTCCAGCGGCTCTGC                                       | -7 (×9)<br>0 (×6)                          |                                                                                 |          |
|                           |                                                                                                         | GCAATTTTTGTGACTTCAACTTTAAT <u>TGGAAGAA</u>                                   | 0 (×25)                                                                         | WT               | GTGTACCTCCTaTCCTCGAGTCCGGCAGCTCTG<br>GT ----- CCTCGAGTCCGGCAGCTCTGC<br>GTGTACCTCCTTCCTCGAGTCCGGCAGCTCTGC     | +1 (×13)<br>-10 (×8)<br>0 (×4)             | chimeric                                                                        |          |
|                           | T2-1-<br>7A<br>-7B                                                                                      | GCAATTTTTGTGACTTCAACTTTAAT <u>TGGAAGAA</u>                                   | 0 (×25)                                                                         | WT               | GCGTACCTCCT- CCTCGAGTCCAGCGGCTCTGC<br>GCGTACCTC ----- GAGTCCAGCGGCTCTGC<br>GCGTACCTCCTTCCTCGAGTCCAGCGGCTCTGC | -1 (×10)<br>-7 (×10)<br>0 (×5)             | chimeric                                                                        |          |
|                           |                                                                                                         | GCAATTTTTGTGACTTCAACTTTAAT <u>TGGAAGAA</u>                                   | 0 (×25)                                                                         | WT               | GTGTACCTCCTa TCCTCGAGTCCGGCAGCTCTG<br>GT ----- CCTCGAGTCCGGCAGCTCTGC<br>GTGTACCTCCTTCCTCGAGTCCGGCAGCTCTGC    | +1 (×11)<br>-10 (×9)<br>0 (×5)             | chimeric                                                                        |          |
|                           | T2-2-<br>7A<br>-7B                                                                                      | GCAATTTTTGTGACTTCAACTTTAAT <u>TGGAAGAA</u>                                   | 0 (×25)                                                                         | WT               | GCGTACCTCCT- CCTCGAGTCCAGCGGCTCTGC<br>GCGTACCTC ----- GAGTCCAGCGGCTCTGC<br>GCGTACCTCCTTCCTCGAGTCCAGCGGCTCTGC | -1 (×12)<br>-7 (×9)<br>0 (×4)              | chimeric                                                                        |          |
|                           |                                                                                                         | GCAATTTTTGTGACTTCAACTTTAAT <u>TGGAAGAA</u>                                   | 0 (×25)                                                                         | WT               | GTGTACCTCCTa TCCTCGAGTCCGGCAGCTCTG<br>GT ----- CCTCGAGTCCGGCAGCTCTGC<br>GTGTACCTCCTTCCTCGAGTCCGGCAGCTCTGC    | +1 (×11)<br>-10 (×10)<br>0 (×4)            | chimeric                                                                        |          |
| Shoot<br>regeneration     | T1-1-<br>7A<br>-7B                                                                                      | GCAATTTTTGTGACTTCAACTTTAAT <u>TGGAAGAA</u><br>GCAATTTTTGTGACTTCAA ----- ...] | 0 (×22)<br>-244<br>(×3)                                                         | heterozygou<br>s | GCGTACCTCCT- CCTCGAGTCCAGCGGCTCTGC<br>GCGTACCTC ----- GAGTCCAGCGGCTCTGC<br>... ----- TTTACGGTTCAAT]          | -1 (×12)<br>-7 (×10)<br>-244 (×3)          | chimeric                                                                        |          |
|                           |                                                                                                         | GCAATTTTTGTGACTTCAACTTTAAT <u>TGGAAGAA</u>                                   | 0 (×25)                                                                         | WT               | GTGTACCTCCTaTCCTCGAGTCCGGCAGCTCTG<br>GT ----- CCTCGAGTCCGGCAGCTCTGC                                          | +1 (×11)<br>-10 (×14)                      | biallelic                                                                       |          |
|                           | T1-2-<br>7A<br>-7B                                                                                      | GCAATTTTTGTGACTTCAACTTTAAT <u>TGGAAGAA</u>                                   | 0 (×25)                                                                         | WT               | GCGTACCTCCT- CCTCGAGTCCAGCGGCTCTGC<br>GCGTACCTC ----- GAGTCCAGCGGCTCTGC                                      | -1 (×14)<br>-7 (×11)                       | biallelic                                                                       |          |
|                           |                                                                                                         | GCAATTTTTGTGACTTCAACTTTAAT <u>TGGAAGAA</u>                                   | 0 (×25)                                                                         | WT               | GTGTACCTCCTa TCCTCGAGTCCGGCAGCTCTG<br>GT ----- CCTCGAGTCCGGCAGCTCTGC                                         | +1 (×12)<br>-10 (×13)                      | biallelic                                                                       |          |
|                           | T1-3-<br>7A<br>-7B                                                                                      | GCAATTTTTGTGACTTCAACTTTAAT <u>TGGAAGAA</u>                                   | 0 (×25)                                                                         | WT               | GCGTACCTCCT- CCTCGAGTCCAGCGGCTCTGC<br>GCGTACCTC ----- GAGTCCAGCGGCTCTGC                                      | -1 (×15)<br>-7 (×10)                       | biallelic                                                                       |          |
|                           |                                                                                                         | GCAATTTTTGTGACTTCAACTTTAAT <u>TGGAAGAA</u>                                   | 0 (×25)                                                                         | WT               | GTGTACCTCCTaTCCTCGAGTCCGGCAGCTCTG<br>GT ----- CCTCGAGTCCGGCAGCTCTGC                                          | +1 (×11)<br>-10 (×14)                      | biallelic                                                                       |          |
| Line (#)                  | gCesA8A/B-1<br>CesA8A-1, AGTTCCGCCGGAACAGCAGAT <u>TGG</u><br>CesA8B-1, AGTTCCGCCGGAACAGCAGAT <u>TGG</u> |                                                                              | Mutation types<br>(Number of plasmids<br>containing the cloned<br>PCR products) |                  | gCesA8A/B-2<br>CesA8A-2, <u>CCACTACAGAATAACAAATCCTG</u><br>CesA8B-2, <u>CCACTACAGAATAACAAATCCTG</u>          |                                            | Mutation types<br>(Number of plasmids<br>containing the cloned PCR<br>products) |          |
| <i>ptrces8ab-3#-8A-8B</i> | GCTCAAGTCCGCCGGAACA --- GAT <u>TGGAAGA</u>                                                              |                                                                              | -3 (×18)                                                                        | biallelic        | TTCTT <u>CCACTACAGAATAACAAATCCTG</u> TGAT                                                                    | 0 (×25)                                    | WT                                                                              |          |
|                           | GCTCAAGTCCGCCGGA --- GAT <u>TGGAAGA</u>                                                                 |                                                                              | -5 (×7)                                                                         |                  |                                                                                                              |                                            |                                                                                 |          |
|                           | GCTCAAGTCCGCCGGA --- GAAGACTAAGA                                                                        |                                                                              | -4 (×13)                                                                        | biallelic        |                                                                                                              | TTCTT <u>CCACTACaAGAATAACAAATCCTG</u> TGCA | +1 (×10)                                                                        | chimeric |

|                                                                      |                                                                      |                                    |                                                                                                                                                                                            |                                                                                                                                                                                            |                                                                                                                                            |                               |              |
|----------------------------------------------------------------------|----------------------------------------------------------------------|------------------------------------|--------------------------------------------------------------------------------------------------------------------------------------------------------------------------------------------|--------------------------------------------------------------------------------------------------------------------------------------------------------------------------------------------|--------------------------------------------------------------------------------------------------------------------------------------------|-------------------------------|--------------|
|                                                                      |                                                                      | GCTCAAGTTCGCGCG ----- ATGGAAGA     | -9 (×12)                                                                                                                                                                                   |                                                                                                                                                                                            | TTCTT <u>CC</u> ACTAaCAGAATAACAAATCCTGTGCGA<br>TTCTT <u>CC</u> ACTA- AGAATAACAAATCCTGTGCGAT<br>TTCTT <u>CC</u> ACTACAGAATAACAAATCCTGTGCGAT | +1 (×2)<br>-1 (×10)<br>0 (×3) |              |
| Apical bud                                                           | T0-8A<br>-8B                                                         | GCTCAAGTTCGCGCGGAACA --- GATGGAAGA | -3 (×19)                                                                                                                                                                                   | biallelic                                                                                                                                                                                  | TTCTT <u>CC</u> ACTACAGAATAACAAATCCTGTTGAT                                                                                                 | 0 (×25)                       | WT           |
|                                                                      |                                                                      | GCTCAAGTTCGCGCGGAA ----- GATGGAAGA | -5 (×6)                                                                                                                                                                                    |                                                                                                                                                                                            |                                                                                                                                            |                               |              |
|                                                                      | GCTCAAGTTCGCGCGGA ---- GAAGACTAAGA<br>GCTCAAGTTCGCGCG ----- ATGGAAGA | -4 (×14)<br>-9 (×11)               | biallelic                                                                                                                                                                                  | TTCTT <u>CC</u> ACTACaAGAATAACAAATCCTGTGCGAT<br>TTCTT <u>CC</u> ACTAaCAGAATAACAAATCCTGTGCGAT<br>TTCTT <u>CC</u> ACTA-AGAATAACAAATCCTGTGCGAT<br>TTCTT <u>CC</u> ACTACAGAATAACAAATCCTGTGCGAT | +1 (×10)<br>+1 (×2)<br>-1 (×9)<br>0 (×4)                                                                                                   | chimeric                      |              |
| Axillary bud                                                         | T1-1-<br>8A<br>-8B                                                   | GCTCAAGTTCGCGCGGAACA --- GATGGAAGA | -3 (×18)                                                                                                                                                                                   | biallelic                                                                                                                                                                                  | TTCTT <u>CC</u> ACTACAGAATAACAAATCCTGTTGAT                                                                                                 | 0 (×25)                       | WT           |
|                                                                      |                                                                      | GCTCAAGTTCGCGCGGAA ----- GATGGAAGA | -5 (×7)                                                                                                                                                                                    |                                                                                                                                                                                            |                                                                                                                                            |                               |              |
|                                                                      | GCTCAAGTTCGCGCGGA ---- GAAGACTAAGA<br>GCTCAAGTTCGCGCG ----- ATGGAAGA | -4 (×14)<br>-9 (×11)               | biallelic                                                                                                                                                                                  | TTCTT <u>CC</u> ACTACaAGAATAACAAATCCTGTGCGAT<br>TTCTT <u>CC</u> ACTAaCAGAATAACAAATCCTGTGCGAT<br>TTCTT <u>CC</u> ACTA-AGAATAACAAATCCTGTGCGAT<br>TTCTT <u>CC</u> ACTACAGAATAACAAATCCTGTGCGAT | +1 (×10)<br>+1 (×4)<br>-1 (×9)<br>0 (×2)                                                                                                   | chimeric                      |              |
|                                                                      | T1-2-<br>8A<br>-8B                                                   | GCTCAAGTTCGCGCGGAACA --- GATGGAAGA | -3 (×15)                                                                                                                                                                                   | biallelic                                                                                                                                                                                  | TTCTT <u>CC</u> ACTACAGAATAACAAATCCTGTTGAT                                                                                                 | 0 (×24)                       | WT           |
|                                                                      |                                                                      | GCTCAAGTTCGCGCGGAA ----- GATGGAAGA | -5 (×10)                                                                                                                                                                                   |                                                                                                                                                                                            |                                                                                                                                            |                               |              |
|                                                                      | GCTCAAGTTCGCGCGGA ---- GAAGACTAAGA<br>GCTCAAGTTCGCGCG ----- ATGGAAGA | -4 (×9)<br>-9 (×16)                | biallelic                                                                                                                                                                                  | TTCTT <u>CC</u> ACTACaAGAATAACAAATCCTGTGCGAT<br>TTCTT <u>CC</u> ACTAaCAGAATAACAAATCCTGTGCGAT<br>TTCTT <u>CC</u> ACTA-AGAATAACAAATCCTGTGCGAT<br>TTCTT <u>CC</u> ACTACAGAATAACAAATCCTGTGCGAT | +1 (×10)<br>+1 (×2)<br>-1 (×11)<br>0 (×2)                                                                                                  | chimeric                      |              |
|                                                                      | T2-1-<br>8A<br>-8B                                                   | GCTCAAGTTCGCGCGGAACA --- GATGGAAGA | -3 (×15)                                                                                                                                                                                   | biallelic                                                                                                                                                                                  | TTCTT <u>CC</u> ACTACAGAATAACAAATCCTGTTGAT                                                                                                 | 0 (×20)                       | heterozygous |
|                                                                      |                                                                      | GCTCAAGTTCGCGCGGAA ----- GATGGAAGA | -5 (×10)                                                                                                                                                                                   |                                                                                                                                                                                            | TTCTT <u>CC</u> ACTA --- AATAACAAATCCTGTTGAT                                                                                               | -3 (×5)                       |              |
|                                                                      | GCTCAAGTTCGCGCGGA ---- GAAGACTAAGA<br>GCTCAAGTTCGCGCG ----- ATGGAAGA | -4 (×15)<br>-9 (×10)               | biallelic                                                                                                                                                                                  | TTCTT <u>CC</u> ACTACaAGAATAACAAATCCTGTGCGAT<br>TTCTT <u>CC</u> ACTAaCAGAATAACAAATCCTGTGCGAT<br>TTCTT <u>CC</u> ACTA-AGAATAACAAATCCTGTGCGAT<br>TTCTT <u>CC</u> ACTACAGAATAACAAATCCTGTGCGAT | +1 (×8)<br>+1 (×3)<br>-1 (×11)<br>0 (×3)                                                                                                   | chimeric                      |              |
|                                                                      | T2-2-<br>8A<br>-8B                                                   | GCTCAAGTTCGCGCGGAACA --- GATGGAAGA | -3 (×14)                                                                                                                                                                                   | biallelic                                                                                                                                                                                  | TTCTT <u>CC</u> ACTACAGAATAACAAATCCTGTTGAT                                                                                                 | 0 (×25)                       | WT           |
| GCTCAAGTTCGCGCGGAA ----- GATGGAAGA                                   |                                                                      | -5 (×11)                           |                                                                                                                                                                                            |                                                                                                                                                                                            |                                                                                                                                            |                               |              |
| GCTCAAGTTCGCGCGGA ---- GAAGACTAAGA<br>GCTCAAGTTCGCGCG ----- ATGGAAGA | -4 (×10)<br>-9 (×15)                                                 | biallelic                          | TTCTT <u>CC</u> ACTACaAGAATAACAAATCCTGTGCGAT<br>TTCTT <u>CC</u> ACTAaCAGAATAACAAATCCTGTGCGAT<br>TTCTT <u>CC</u> ACTA-AGAATAACAAATCCTGTGCGAT<br>TTCTT <u>CC</u> ACTACAGAATAACAAATCCTGTGCGAT | +1 (×9)<br>+1 (×1)<br>-1 (×12)<br>0 (×3)                                                                                                                                                   | chimeric                                                                                                                                   |                               |              |
| Shoot regeneration                                                   | T1-1-<br>8A<br>-8B                                                   | GCTCAAGTTCGCGCGGAACA --- GATGGAAGA | -3 (×25)                                                                                                                                                                                   | homozygous                                                                                                                                                                                 | TTCTT <u>CC</u> ACTACAGAATAACAAATCCTGTTGAT                                                                                                 | 0 (×23)                       | heterozygous |
|                                                                      |                                                                      | GCTCAAGTTCGCGCGGAA ----- GATGGAAGA | -5 (×10)                                                                                                                                                                                   |                                                                                                                                                                                            | TTCTT <u>CC</u> CAC ----- AACAAATCCTGTTGAT                                                                                                 | -8 (×2)                       |              |
|                                                                      | GCTCAAGTTCGCGCGGA ---- GAAGACTAAGA<br>GCTCAAGTTCGCGCG ----- ATGGAAGA | -4 (×12)<br>-9 (×13)               | biallelic                                                                                                                                                                                  | TTCTT <u>CC</u> ACTAC aAGAATAACAAATCCTGTGCGAT<br>TTCTT <u>CC</u> ACTA - AGAATAACAAATCCTGTGCGAT                                                                                             | +1 (×12)<br>-1 (×13)                                                                                                                       | biallelic                     |              |
| T1-2-                                                                | GCTCAAGTTCGCGCGGAACA --- GATGGAAGA                                   | -3 (×25)                           | homozygous                                                                                                                                                                                 | TTCTT <u>CC</u> ACTACAGAATAACAAATCCTGTTGAT                                                                                                                                                 | 0 (×25)                                                                                                                                    | WT                            |              |

|                      |                    |                                                                                                               |                                                         |                                                                                        |                                                                                                              |                                |                                                                                        |
|----------------------|--------------------|---------------------------------------------------------------------------------------------------------------|---------------------------------------------------------|----------------------------------------------------------------------------------------|--------------------------------------------------------------------------------------------------------------|--------------------------------|----------------------------------------------------------------------------------------|
|                      | 8A<br>-8B          | GCTCAAGTCCGCCGGA ---- GAAGACTAAGA<br>GCTCAAGTCCGCCG ----- ATGGAAGA                                            | -4 (×13)<br>-9 (×12)                                    | biallelic                                                                              | TTCTTCCACTACaAGAATAACAAATCCTGTGCGAT<br>TTCTTCCACTA- AGAATAACAAATCCTGTGCGAT                                   | +1 (×9)<br>-1 (×16)            | biallelic                                                                              |
|                      | T1-3-<br>8A<br>-8B | GCTCAAGTCCGCCGGAACA --- GATGGAAGA<br>GCTCAAGTCCGCCGGAA ---- GATGGAAGA                                         | -3 (×20)<br>-5 (×5)                                     | biallelic                                                                              | TTCTTCCACTACAGAATAACAAATCCTGTTGAT<br>TTCTTCCACTA t CAGAATAACAAATCCTGTTGAT                                    | 0 (×22)<br>+1 (×2)             | heterozygous                                                                           |
|                      |                    | GCTCAAGTCCGCCGGA ---- GAAGACTAAGA<br>GCTCAAGTCCGCCG ----- ATGGAAGA                                            | -4 (×12)<br>-9 (×13)                                    | biallelic                                                                              | TTCTTCCACTACaAGAATAACAAATCCTGTGCGAT<br>TTCTTCCACTA- AGAATAACAAATCCTGTGCGAT                                   | +1 (×9)<br>-1 (×16)            | biallelic                                                                              |
| <b>Line (#)</b>      |                    | <b>gCesA8A/B-3</b><br>CesA8A-3, GAACTGGTTGTGTTTTCAATAGG<br>CesA8B-3, GAACTGGTTGTGTTTTCAATAGG                  |                                                         | <b>Mutation types</b><br>(Number of plasmids<br>containing the cloned<br>PCR products) | <b>gCesA8A/B-4</b><br>CesA8A-4, CCACAAGTAGGTCGAGATGTATG<br>CesA8B-4, CCACAAGTAGGTCGAGATGTATG                 |                                | <b>Mutation types</b><br>(Number of plasmids<br>containing the cloned PCR<br>products) |
| <i>ptrcesA8ab-6#</i> | 8A<br>-8B          | TGTGGGAAGTGGTTGTGTTTTC t AATAGGCAAG<br>TGTGGGAAGTGGT ----- ...                                                | +1 (×18)<br>-31 (×7)                                    | biallelic                                                                              | TGGATCCACAAaGTAGGTCGAGATGTATGCTATG<br>TGGATCCACAAGTAGGTCGAGATGTATGCTATG                                      | +1 (×22)<br>0 (×3)             | heterozygous                                                                           |
|                      |                    | TGTGGGAAGTGGTTGTGTTTTCaAATAGGCAAG<br>TGTGGGAAGTGGTTGTGTTTTCaA ATAGGCAAG<br>TGTGGGAAGTGGTTGTGTA --- AATAGGCAAG | +1 (×15)<br>+2 (×2)<br>-3 (×8)                          | chimeric                                                                               | TGGATCCACAAGTAGGTCGAGATGTATGCTATG                                                                            | 0 (×25)                        | WT                                                                                     |
| <b>Apical bud</b>    | T0-8A<br>-8B       | TGTGGGAAGTGGTTGTGTTTTC t AATAGGCAAG<br>TGTGGGAAGTGGT ----- ...                                                | +1 (×14)<br>-31 (×11)                                   | biallelic                                                                              | TGGATCCACAAaGTAGGTCGAGATGTATGCTATG<br>TGGATCCACAAGTAGGTCGAGATGTATGCTATG                                      | +1 (×17)<br>0 (×8)             | heterozygous                                                                           |
|                      |                    | TGTGGGAAGTGGTTGTGTTTTCaAATAGGCAAG<br>TGTGGGAAGTGGTTGTGTTTTCaA ATAGGCAAG<br>TGTGGGAAGTGGTTGTGTA --- AATAGGCAAG | +1 (×13)<br>+2 (×2)<br>-3 (×10)                         | chimeric                                                                               | TGGATCCACAAGTAGGTCGAGATGTATGCTATG                                                                            | 0 (×25)                        | WT                                                                                     |
|                      |                    | TGTGGGAAGTGGTTGTGTTTTCaAATAGGCAAG<br>TGTGGGAAGTGGTTGTGTTTTCaAATAGGCAAG<br>TGTGGGAAGTGGTTGTGTA --- AATAGGCAAG  | +1 (×12)<br>-31 (×13)<br>+1 (×17)<br>+2 (×1)<br>-3 (×7) | biallelic<br>chimeric                                                                  | TGGATCCACAAaGTAGGTCGAGATGTATGCTATG<br>TGGATCCACAAGTAGGTCGAGATGTATGCTATG<br>TGGATCCACAAGTAGGTCGAGATGTATGCTATG | +1 (×13)<br>0 (×12)<br>0 (×25) | heterozygous<br>WT                                                                     |
| <b>Axillary bud</b>  | T1-1-<br>8A<br>-8B | TGTGGGAAGTGGTTGTGTTTTCaAATAGGCAAG<br>TGTGGGAAGTGGT ----- ...                                                  | +1 (×12)<br>-31 (×13)                                   | biallelic                                                                              | TGGATCCACAAaGTAGGTCGAGATGTATGCTATG<br>TGGATCCACAAGTAGGTCGAGATGTATGCTATG                                      | +1 (×13)<br>0 (×12)            | heterozygous                                                                           |
|                      |                    | TGTGGGAAGTGGTTGTGTTTTCaAATAGGCAAG<br>TGTGGGAAGTGGTTGTGTTTTCaA ATAGGCAAG<br>TGTGGGAAGTGGTTGTGTA --- AATAGGCAAG | +1 (×17)<br>+2 (×1)<br>-3 (×7)                          | chimeric                                                                               | TGGATCCACAAGTAGGTCGAGATGTATGCTATG                                                                            | 0 (×25)                        | WT                                                                                     |
|                      | T1-2-<br>8A<br>-8B | TGTGGGAAGTGGTTGTGTTTTC t AATAGGCAAG<br>TGTGGGAAGTGGT ----- ...                                                | +1 (×12)<br>-31 (×13)                                   | biallelic                                                                              | TGGATCCACAAaGTAGGTCGAGATGTATGCTATG<br>TGGATCCACAAGTAGGTCGAGATGTATGCTATG                                      | +1 (×15)<br>0 (×10)            | heterozygous                                                                           |
|                      |                    | TGTGGGAAGTGGTTGTGTTTTCaAATAGGCAAG<br>TGTGGGAAGTGGTTGTGTTTTCaA ATAGGCAAG<br>TGTGGGAAGTGGTTGTGTA --- AATAGGCAAG | +1 (×18)<br>+2 (×1)<br>-3 (×6)                          | chimeric                                                                               | TGGATCCACAAGTAGGTCGAGATGTATGCTATG                                                                            | 0 (×25)                        | WT                                                                                     |
|                      |                    | TGTGGGAAGTGGTTGTGTTTTC t AATAGGCAAG<br>TGTGGGAAGTGGT ----- ...                                                | +1 (×10)<br>-31 (×15)                                   | biallelic                                                                              | TGGATCCACAAaGTAGGTCGAGATGTATGCTATG<br>TGGATCCACAAGTAGGTCGAGATGTATGCTATG                                      | +1 (×16)<br>0 (×9)             | heterozygous                                                                           |
|                      |                    | TGTGGGAAGTGGTTGTGTTTTCaAATAGGCAAG<br>TGTGGGAAGTGGTTGTGTTTTCaA ATAGGCAAG<br>TGTGGGAAGTGGTTGTGTA --- AATAGGCAAG | +1 (×20)<br>+2 (×1)<br>-3 (×5)                          | chimeric                                                                               | TGGATCCACAAGTAGGTCGAGATGTATGCTATG                                                                            | 0 (×25)                        | WT                                                                                     |
|                      | T2-1-<br>8A<br>-8B | TGTGGGAAGTGGTTGTGTTTTC t AATAGGCAAG<br>TGTGGGAAGTGGT ----- ...                                                | +1 (×15)<br>-31 (×10)                                   | biallelic                                                                              | TGGATCCACAA a<br>GTAGGTCGAGATGTATGCTATG<br>TGGATCCACAAGTAGGTCGAGATGTATGCTATG                                 | +1 (×16)<br>0 (×9)             | heterozygous                                                                           |

|                       |                    |                                                                                                                    |                                |            |                                                                              |                      |              |
|-----------------------|--------------------|--------------------------------------------------------------------------------------------------------------------|--------------------------------|------------|------------------------------------------------------------------------------|----------------------|--------------|
|                       |                    | TGTGGGAAGTGGTTGTGTTTTCa AATAGGCAAG<br>TGTGGGAAGTGGTTGTGTTTTCaaAATAGGCAA<br>G<br>TGTGGGAAGTGGTTGTGTA --- AATAGGCAAG | +1 (×17)<br>+2 (×1)<br>-3 (×7) | chimeric   | TGGATCCACAAGTAGGTCGAGATGTATGCTATG                                            | 0 (×25)              | WT           |
| Shoot<br>regeneration | T1-1-<br>8A<br>-8B | TGTGGGAAGTGGTTGTGTTTTCt AATAGGCAAG<br>TGTGGGAAGTGGT -----...                                                       | +1 (×11)<br>-31 (×14)          | biallelic  | TGGATCCACAA a<br>GTAGGTCGAGATGTATGCTATG<br>TGGATCCACAAGTAGGTCGAGATGTATGCTATG | +1 (×15)<br>0 (×10)  | heterozygous |
|                       |                    | TGTGGGAAGTGGTTGTGTTTTCa AATAGGCAAG                                                                                 | +1 (×25)                       | homozygous | TGGATCCACAAGTAGGTCGAGATGTATGCTATG<br>TGGATCCACAA c<br>GTAGGTCGAGATGTATGCTATG | 0 (×23)<br>+1 (×2)   | heterozygous |
|                       | T1-2-<br>8A<br>-8B | TGTGGGAAGTGGTTGTGTTTTC t AATAGGCAAG<br>TGTGGGAAGTGGT -----...                                                      | +1 (×20)<br>-31 (×5)           | biallelic  | TGGATCCACAA a<br>GTAGGTCGAGATGTATGCTATG<br>TGGATCCACAAGTAGGTCGAGATGTATGCTATG | +1 (×16)<br>0 (×9)   | heterozygous |
|                       |                    | TGTGGGAAGTGGTTGTGTA ---<br>AATAGGCAAGC<br>..... AATAGGCAAGC                                                        | -3 (×3)<br>-689 (×22)          | biallelic  | TGGATCCACAAGTAGGTCGAGATGTATGCTATG<br>TGGATCCACAAA -----...                   | 0 (×3)<br>-689 (×22) | heterozygous |
|                       | T1-3-<br>8A<br>-8B | TGTGGGAAGTGGTTGTGTTTTC t AATAGGCAAG<br>TGTGGGAAGTGGT -----...                                                      | +1 (×9)<br>-31 (×16)           | biallelic  | TGGATCCACAA a<br>GTAGGTCGAGATGTATGCTATG<br>TGGATCCACAAGTAGGTCGAGATGTATGCTATG | +1 (×9)<br>0 (×16)   | heterozygous |
|                       |                    | TGTGGGAAGTGGTTGTGTTTTCa AATAGGCAAG<br>..... AATAGGCAAGC                                                            | +1 (×2)<br>-689 (×23)          | biallelic  | TGGATCCACAAGTAGGTCGAGATGTATGCTATG<br>TGGATCCACAAA -----...                   | 0 (×2)<br>-689 (×23) | heterozygous |



**Table S8** Inheritance of the Cas9/gRNA-induced mutations in the progeny of the *ptrcesa* lines.

| <i>ptrcesa</i> line#    | Genotype               | Apical bud | Axillary bud |      |      |      | Shoot regeneration |      |      |
|-------------------------|------------------------|------------|--------------|------|------|------|--------------------|------|------|
|                         |                        | T0         | T1-1         | T1-2 | T2-1 | T2-2 | T1-1               | T1-2 | T1-3 |
| <i>ptrcesa4-2#</i>      | heterozygous/biallelic | N/N        | N/N          | N/N  | N/N  | N/N  | Y/N                | N/Y  | N/N  |
| <i>ptrcesa4-5#</i>      | biallelic/WT           | N/N        | N/N          | N/N  | N/N  | N/N  | N/N                | N/N  | N/N  |
| <i>ptrcesa7ab-5#-7A</i> | WT/biallelic           | N/N        | N/N          | N/N  | N/N  | N/N  | N/N                | N/N  | N/N  |
| <i>-5#-7B</i>           | WT/biallelic           | N/N        | N/N          | N/N  | N/N  | N/N  | N/N                | N/N  | N/N  |
| <i>ptrcesa7ab-6#-7A</i> | WT/chimeric            | N/N        | N/N          | N/N  | N/N  | N/N  | Y/Y                | N/Y  | N/Y  |
| <i>-6#-7B</i>           | WT/chimeric            | N/N        | N/N          | N/N  | N/N  | N/N  | N/Y                | N/Y  | N/Y  |
| <i>ptrcesa8ab-3#-8A</i> | biallelic/WT           | N/N        | N/N          | N/N  | N/Y  | N/N  | Y/Y                | Y/N  | N/Y  |
| <i>-3#-8B</i>           | biallelic/chimeric     | N/N        | N/N          | N/N  | N/N  | N/N  | N/Y                | N/Y  | N/Y  |
| <i>ptrcesa8ab-6#-8A</i> | biallelic/heterozygous | N/N        | N/N          | N/N  | N/N  | N/N  | N/N                | N/N  | N/N  |
| <i>-6#-8B</i>           | chimeric/WT            | N/N        | N/N          | N/N  | N/N  | N/N  | Y/Y                | Y/Y  | Y/Y  |

Biallelic, two alleles of the gene were edited and the different mutations were induced.  
Chimeric, more than three different allelic mutations in a target editing site of the gene.
